# Supplementary material for: Lead-oriented synthesis of epigenetic relevant scaffolds
Source: Royal Society of Chemistry journal article supplement (doi:10.1039/d3cc04317g), 2023-01-01

## Lead-Oriented Synthesis of Epigenetic Relevant Scaffolds

Timothé Maujean,<sup>[a]</sup> Prakash Kannaboina,<sup>[a]</sup> Adam I. Green,<sup>[a]</sup> George M. Burslem<sup>[a]</sup>

---

## Table of contents

|      |                                                                                |    |
|------|--------------------------------------------------------------------------------|----|
| 1    | General information.....                                                       | 4  |
| 2    | Synthetic procedures .....                                                     | 4  |
| 2.1  | Synthesis of maleimide S1.....                                                 | 4  |
| 2.2  | Synthesis of tetrahydroquinoline 1b.....                                       | 5  |
| 2.3  | Synthesis of protected dipeptide S2 .....                                      | 5  |
| 2.4  | Synthesis of diketopiperazine methyl ester S3 .....                            | 6  |
| 2.5  | Synthesis of diketopiperazine carboxylic acid S4 .....                         | 6  |
| 2.6  | Synthesis of diketopiperazine-pyridinone 2b.....                               | 6  |
| 2.7  | Synthesis of O-benzyl diketopiperazine hydroxamate S5 .....                    | 7  |
| 2.8  | Synthesis of hydroxamic acid 2c .....                                          | 7  |
| 2.9  | Synthesis of Boc-protected diketopiperazine S6 .....                           | 7  |
| 2.10 | Synthesis of diketopiperazine isoxazole 2a.....                                | 8  |
| 2.11 | Synthesis of hydrazone S7.....                                                 | 8  |
| 2.12 | Synthesis of boronic acid S8.....                                              | 9  |
| 2.13 | Synthesis of spiro-indoline S9 .....                                           | 9  |
| 2.14 | Synthesis of Acetylated isoxazole spiro-indoline 3a .....                      | 9  |
| 2.15 | Synthesis of hydrazone S10.....                                                | 10 |
| 2.16 | Synthesis of spiro-indoline S10 .....                                          | 10 |
| 2.17 | Synthesis of spiroindoline pyridinone 3b.....                                  | 11 |
| 2.18 | Synthesis of O-benzyl spiro-indoline hydroxamate S11.....                      | 11 |
| 2.19 | Synthesis of spiro-indoline hydroxamic acid 3c .....                           | 12 |
| 3    | Computational procedures .....                                                 | 13 |
| 3.1  | General information.....                                                       | 13 |
| 3.2  | Selection and tuning of the evaluation sub-functions $\lambda$ .....           | 13 |
| 3.3  | Design of the sub-evaluation function for global 3D-ness.....                  | 14 |
| 3.4  | Optimisation and Expression of the evaluation function $\Delta$ .....          | 15 |
| 3.5  | Application on the MLSMR.....                                                  | 16 |
| 3.6  | Relation between PMI scoring and other properties.....                         | 19 |
| 3.7  | Benchmarking against LLAMA.....                                                | 20 |
| 3.8  | Correlation with Molecular complexity according to Böttcher <sup>6</sup> ..... | 21 |

---

|        |                                                                  |    |
|--------|------------------------------------------------------------------|----|
| 3.9    | Lead-likeness distribution in all three chemical libraries ..... | 21 |
| 3.10   | Generation of conformers using OEOMEGA .....                     | 23 |
| 3.11   | Docking study .....                                              | 23 |
| 3.11.1 | Command lines .....                                              | 23 |
| 3.11.2 | Docking poses for selected compounds .....                       | 24 |
| 3.12   | Biological evaluation .....                                      | 26 |
| 4      | References .....                                                 | 27 |
| 5      | NMR spectra.....                                                 | 27 |

## 1 General information

Solvents were removed under reduced pressure using an IKA rotary evaporator equipped with an IKA MVP10 basic vacuum pump. Dry solvents and reagents were purchased from commercial suppliers and used without further purification. Thin-layer chromatography was performed on Merck silica gel 60F254 plates. Flash column chromatography was conducted using a Teledyne ISCO CombiFlash NextGen 300+ purification system using 4g, 12g, or 24g RediSep Rf silica cartridges. Thermo Scientific silica gel (35-70  $\mu\text{m}$ ) was used for manual chromatography columns.

Analytical LC-MS was performed using a system comprised of an Agilent 1260 Infinity II HPLC instrument equipped with an Agilent InfinityLab LS/MSD XT MS detector with electrospray ionisation. The system ran with a positive and negative switching mode and UV diode array detector using an Agilent ZORBAX SB-C18 RRHT (50 mm  $\times$  4.6 mm  $\times$  1.8  $\mu\text{m}$ ) column and gradient elution with two binary solvent systems: MeCN/H<sub>2</sub>O or MeCN/H<sub>2</sub>O plus 0.1% formic acid. Preparative HPLC was performed using a system comprising an Agilent 1260 Infinity II HPLC system equipped with an Agilent 1290 Prep Bin Pump, an Agilent Prep-C18 column (250 mm  $\times$  21.2 mm  $\times$  10  $\mu\text{m}$ ), and an Agilent prep autosampler and fraction collector. The system ran using a UV diode array detector and purification was performed using a gradient elution using a MeCN/H<sub>2</sub>O binary solvent system.

NMR analysis was conducted using a Bruker NEO400 spectrometer equipped with a 5mm BBFO IProbe ( $^1\text{H}$  = 400 MHz and  $^{13}\text{C}$  = 100 MHz) or a Bruker NEO600 spectrometer equipped with a Prodigy BBO cryoprobe ( $^1\text{H}$  = 600 MHz and  $^{13}\text{C}$  = 150 MHz). Chemical shifts are quoted in parts per million (ppm) and coupling constants are given in Hz. Splitting patterns have been abbreviated as follows: s (singlet), d (doublet), dd (doublet of doublets), ddd (doublet of doublets of doublets), td (triplet of doublets), t (triplet), q (quartet) and m (multiplet). NMR data is reported in the format: ppm (number of protons, splitting pattern, coupling constant).

Reactions were irradiated using a Kessil A160WE (Tuna Blue) LED lamp at 5cm.

## 2 Synthetic procedures

Compounds **1a** and **1c** have been previously reported in the literature.<sup>1</sup>

### 2.1 Synthesis of maleimide **S1**

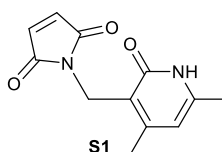

Maleic anhydride (1 equiv., 500 mg, 5.1 mmol) and 3-(Aminomethyl)-4,6-dimethylpyridin-2(1H)-one (1.1 equiv., 854 mg, 5.61 mmol) were added to acetic acid (3 mL) and stirred at 120°C for 6 hours (checked by LC-MS). The mixture was cooled to room temperature and poured in cold water. The aqueous fraction was extracted three times with DCM, the organic phases were combined, dried over MgSO<sub>4</sub>, and concentrated *in vacuo*. The crude was purified by column chromatography (0% MeOH in DCM to 2.5% MeOH in DCM + 0.5% AcOH) to afford the desired product **S1** as a white powder (196 mg, 17%). Fractions need to be checked by LCMS as a side product co-elutes but cannot be detected by TLC.

$^1\text{H}$  NMR (400 MHz, DMSO)  $\delta$  11.34 (s, 1H), 6.92 (s, 2H), 5.82 (s, 1H), 4.40 (s, 2H), 2.15 (s, 3H), 2.08 (s, 3H).  $^{13}\text{C}$  NMR (101 MHz, DMSO)  $\delta$  171.0, 162.6, 150.3, 143.6, 134.8, 119.3, 107.8, 34.3, 19.5, 18.6. **LCMS (ESI)**: Calculated for C<sub>12</sub>H<sub>13</sub>N<sub>2</sub>O<sub>3</sub> [M+H]<sup>+</sup>: 233.1; Found: 232.9.

## 2.2 Synthesis of tetrahydroquinoline 1b

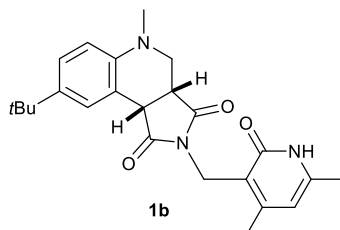

**S1** (1 equiv., 58 mg, 0.25 mmol) and 4-*tert*-butyl-*N,N*-dimethylaniline (5 equiv., 221 mg, 1.75 mmol) were added to a 10 mL vial and suspended in 1,4-dioxane (3 mL) with stirring. The reaction was then irradiated with a blue LED light (Kessil A160WE lamp), cooled with a fan and supplied with oxygen with an air balloon for 48 hours at room temperature. The solvent was then evaporated under reduced pressure and the crude product was dissolved in DMF/water (9:1) and purified by preparative reversed-phase HPLC chromatography (Agilent 1260 Infinity II HPLC) on a Agilent Prep-C18 column (250 mm × 21.2 mm × 10 μm) using a linear gradient (5% to 95% in 24 min, flow-rate of 20 mL.min<sup>-1</sup>) of solvent B (0.1% TFA in ACN, v/v) in solvent A (0.1% TFA in H<sub>2</sub>O, v/v). Detection was set at 254 and 280 nm. The volatiles were then evaporated in a SpeedVac Concentrator (Fisher Scientific). The compound was obtained as a yellow oil which showed a little degradation. It was then purified by silica gel column chromatography (0-3% MeOH in DCM) to afford the desired product as a light-yellow solid (29 mg, 28%).

**<sup>1</sup>H NMR** (400 MHz, CDCl<sub>3</sub>) δ 13.10 (s, 1H), 7.49 (d, *J* = 2.5 Hz, 1H), 7.23 (dd, *J* = 8.6, 2.4 Hz, 1H), 6.65 (d, *J* = 8.6 Hz, 1H), 5.87 (s, 1H), 4.69 (d, *J* = 14.3 Hz, 1H), 4.53 (d, *J* = 14.1 Hz, 1H), 3.93 (d, *J* = 9.6 Hz, 1H), 3.43 (dd, *J* = 11.3, 3.2 Hz, 1H), 3.31 (ddd, *J* = 9.5, 4.7, 3.2 Hz, 1H), 3.03 (dd, *J* = 11.3, 4.7 Hz, 1H), 2.78 (s, 3H), 2.24 (d, *J* = 5.4 Hz, 6H), 1.33 (s, 9H); **<sup>13</sup>C NMR** (101 MHz, CDCl<sub>3</sub>) δ 178.0, 176.2, 164.4, 151.7, 146.1, 143.7, 142.0, 127.5, 125.1, 118.7, 118.3, 111.9, 109.4, 50.9, 43.3, 42.0, 39.4, 35.7, 34.0, 31.5, 19.6, 18.5; **LCMS (ESI)**: Calculated C<sub>24</sub>H<sub>30</sub>N<sub>3</sub>O<sub>3</sub> for [M+H]<sup>+</sup>: 408.2; Found: 408.0; **R<sub>f</sub>** = 0.37 (5% MeOH in DCM).

## 2.3 Synthesis of protected dipeptide S2

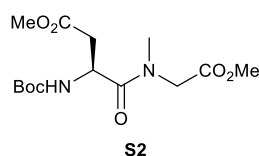

To a solution of Boc-Asp(OMe)-OH (1 equiv., 1771 mg, 7.16 mmol) in DCM (35 mL) were added DMAP (1.2 equiv., 1051 mg, 8.6 mmol), EDCI (1 equiv., 1373 mg, 7.16 mmol) and sarcosine methyl ester hydrochloride (1 equiv., 1000 mg, 7.16 mmol). The reaction was stirred overnight at room temperature. The solution was then washed with 1N HCl, brine and dried over Na<sub>2</sub>SO<sub>4</sub> and concentrated under reduced pressure. The crude was purified by silica gel chromatography (20%-50% EtOAc in hexanes) to afford the desired compound **S2** as a clear oil (770 mg, 32%) and as a mixture of rotamers.

**<sup>1</sup>H NMR** (400 MHz, CDCl<sub>3</sub>) δ 5.40 (t, *J* = 9.3 Hz, 1H, M+m), 5.14 – 5.00 (m, 1H, M), 4.93 – 4.80 (m, 1H, m), 4.30 (d, *J* = 2.0 Hz, 2H, m), 4.21 (d, *J* = 17.3 Hz, 1H, M), 4.05 (d, *J* = 17.3 Hz, 1H, M), 3.78 (s, 3H, m), 3.75 (s, 3H, M), 3.71 (s, 3H, M), 3.70 (s, 3H, m), 3.22 (s, 3H, M), 3.00 (s, 3H, m), 2.86 – 2.74 (m, 2H, m+M), 2.64 (ddd, *J* = 15.6, 7.9, 5.9 Hz, 2H, M+m), 1.45 (s, 9H), 1.44 (s, 9H); **<sup>13</sup>C NMR** (101 MHz, CDCl<sub>3</sub>) δ 171.6 (m), 171.5 (M), 171.2 (m), 171.1 (M), 169.4 (m), 169.2 (M), 154.97 (M), 154.89 (m), 80.26 (m), 80.16 (M), 52.4 (m), 52.2 (M), 52.0 (M), 51.9 (m), 51.3 (m), 49.8 (M), 47.38 (M), 47.33 (M), 37.5 (M), 37.3 (m), 36.5 (M), 35.4 (m), 28.27 (M), 28.25 (m); **LCMS (ESI)**: Calculated for C<sub>14</sub>H<sub>24</sub>N<sub>2</sub>NaO<sub>7</sub> [M+H]<sup>+</sup>: 355.2 ;Found 354.8; **R<sub>f</sub>** = 0.32 (50% EtOAc in Hexanes).

## 2.4 Synthesis of diketopiperazine methyl ester S3

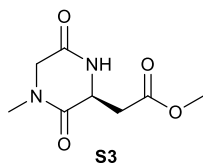

**S2** (1 eq., 770 mg, 2.32 mmol) was dissolved in a solution of 4 M HCl in dioxane (10 mL) and stirred at room temperature for one hour. The solvent was then evaporated under reduced pressure. The product was used without further purification. The crude was dissolved in MeOH (22 mL) and DIPEA was added until pH reached 8-9 (5 mL in this case). The reaction mixture was then stirred at 50 °C overnight. The solvent was evaporated under reduced pressure. The crude was purified by silica gel column chromatography (0-10% MeOH in DCM) to afford the pure product as a yellow oil (302 mg, 65%).

**<sup>1</sup>H NMR** (400 MHz, CDCl<sub>3</sub>) δ 7.05 (bs, 1H), 4.35 (broad d, J = 8.3 Hz, 1H), 4.07 (dd, J = 17.7, 1.3 Hz, 1H), 3.96 (dd, J = 17.6, 1.3 Hz, 1H), 3.73 (s, 3H), 3.05 (dd, J = 17.5, 3.5 Hz, 1H), 3.00 (s, 3H), 2.85 (dd, J = 17.5, 8.1 Hz, 1H); **<sup>13</sup>C NMR** (101 MHz, CDCl<sub>3</sub>) δ 171.1, 165.1, 164.8, 52.2, 51.7, 51.6, 38.0, 34.0; **LCMS (ESI)**: Calculated for C<sub>8</sub>H<sub>13</sub>N<sub>2</sub>O<sub>4</sub> [M+H]<sup>+</sup>: 201.1; Found 201.1; **R<sub>f</sub>** = 0.24 (5% MeOH in DCM).

## 2.5 Synthesis of diketopiperazine carboxylic acid S4

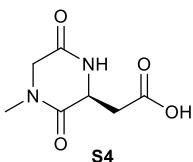

**S3** (1 eq., 186 mg, 0.93 mmol) was dissolved in THF (32 mL) and cooled to 0 °C. A solution of LiOH (2.5 eq., 56 mg, 2.32 mmol) in H<sub>2</sub>O (16 mL) was added dropwise and the reaction mixture was stirred at 0 °C for 1 hour. Keeping the solution at room temperature, the reaction mixture was acidified with HCl to pH = 1 and extracted with DCM. Organic phases were combined, dried over Na<sub>2</sub>SO<sub>4</sub> and concentrated *in vacuo*. The crude was purified by silica gel chromatography (0-10% MeOH in DCM + 1% AcOH) to afford the pure product as a white hygroscopic solid (180 mg, quant.).

**<sup>1</sup>H NMR** (400 MHz, MeOD) δ 4.25 (t, J = 4.8 Hz, 1H), 4.11 (d, J = 17.6 Hz, 1H), 3.99 (d, J = 17.5 Hz, 1H), 2.97 (s, 3H), 2.80 (dd, J = 17.3, 4.2 Hz, 1H); **<sup>13</sup>C NMR** (101 MHz, MeOD) δ 166.7, 166.4, 51.7, 51.1, 37.3, 32.7; **LCMS (ESI)**: Calculated for C<sub>7</sub>H<sub>11</sub>N<sub>2</sub>O<sub>4</sub> [M+H]<sup>+</sup>: 187.1; Found 186.9; **R<sub>f</sub>** = 0.17 (% MeOH in DCM + 1% AcOH).

## 2.6 Synthesis of diketopiperazine-pyridinone 2b

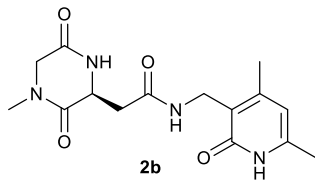

To a solution of **S4** (1 eq., 50 mg, 0.269 mmol) in DMF (4 mL) were added triethylamine (2.5 eq., 94 μL, 0.67 mmol), HOBt (1.2 eq., 44 mg, 0.32 mmol), and EDCI (1.2 eq., 62 mg, 0.32 mmol) and stirred for 10 min. Then, 3-(Aminomethyl)-4,6-dimethylpyridin-2(1H)-one (1.1 eq., 41 mg, 0.27 mmol) was added. The reaction mixture was stirred overnight at room temperature. The solvent and volatiles were removed under reduced pressure. The residue was purified by silica gel chromatography (0%-20% MeOH in DCM + 1% AcOH) to afford the desired product as a yellow solid (71 mg, 89%).

**<sup>1</sup>H NMR** (400 MHz, MeOD) δ 6.12 (s, 1H), 5.51 (s, 1H), 4.35 – 4.18 (m, 3H), 4.08 (d, J = 17.4 Hz, 1H), 3.96 (d, J = 17.4 Hz, 1H), 2.96 (s, 3H), 2.77 (qd, J = 15.6, 5.1 Hz, 2H), 2.27 (d, J = 10.1 Hz, 6H); **<sup>13</sup>C NMR** (101 MHz, MeOD) δ 166.7, 152.5, 143.6, 109.8, 78.1, 52.0, 51.0, 38.4, 34.5, 32.7, 18.2, 17.2; **LCMS (ESI)**: Calculated for C<sub>15</sub>H<sub>21</sub>N<sub>4</sub>O<sub>4</sub> [M+H]<sup>+</sup>: 321.2; Found 320.8; **R<sub>f</sub>** = 0.2 (10% MeOH in DCM + 1% AcOH).

## 2.7 Synthesis of O-benzyl diketopiperazine hydroxamate S5

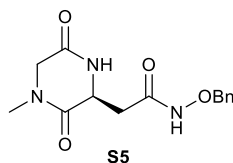

To a solution of **S4** (1 eq., 50 mg, 0.27 mmol) in DMF (4 mL) were added HATU (1.1 eq., 112 mg, 0.3 mmol), DIPEA (1.3 eq., 108  $\mu$ L, 0.62 mmol), and *O*-Benzylhydroxylamine hydrochloride (1 eq., 43 mg, 0.27 mmol). The reaction mixture was stirred at room temperature overnight. The volatiles were removed under reduced pressure. The residue was retaken in EtOAc and washed with an aqueous 1M HCl solution, saturated  $\text{NaHCO}_3$  and brine. The organic phases were gathered, dried over  $\text{Na}_2\text{SO}_4$  and concentrated under vacuo. The product could be seen in this residue so the aqueous phases was concentrated under vacuo. The solid thus obtained was extracted twice with DCM which allowed to obtain the desired product after evaporation of the volatiles. The residue was further purified by flash chromatography on silica gel (0-10% MeOH in DCM) to afford the desired product as a yellow oil (60 mg, 77%).

$^1\text{H NMR}$  (400 MHz, MeOD)  $\delta$  7.48 – 7.19 (m, 5H), 4.25 (t,  $J$  = 4.9 Hz, 1H), 4.06 (dd,  $J$  = 17.6, 1.4 Hz, 1H), 3.93 (dd,  $J$  = 17.6, 1.2 Hz, 1H), 2.94 (s, 3H), 2.72 (dd,  $J$  = 15.7, 5.2 Hz, 1H), 2.55 (dd,  $J$  = 15.8, 4.8 Hz, 1H);  $^{13}\text{C NMR}$  (101 MHz, MeOD)  $\delta$  167.5, 166.4, 166.4, 135.5, 129.0, 128.3, 128.1, 77.8, 51.7, 51.0, 35.5, 32.8; **LCMS (ESI)**: Calculated for  $\text{C}_{14}\text{H}_{18}\text{N}_3\text{O}_4$   $[\text{M}+\text{H}]^+$ : 292.1; Found 291.9.

## 2.8 Synthesis of hydroxamic acid 2c

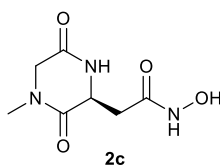

To a solution of **S5** (1 eq., 60 mg, 0.206 mmol) in MeOH (5 mL) flushed with nitrogen was added 10% Pd/C (12 mg, 20% w/w). In the reaction mixture was bubbled hydrogen and it was stirred at room temperature for 6 hours. Completion was checked by TLC (10% MeOH in DCM). The reaction mixture was filtered over celite and washed with MeOH. The product was obtained as a white solid (39 mg, quant.) that could be used without further purification.

$^1\text{H NMR}$  (400 MHz, DMSO)  $\delta$  10.46 (s, 1H), 8.79 (s, 1H), 8.12 – 7.94 (m, 1H), 4.10 – 4.03 (m, 1H), 3.91 – 3.85 (m, 1H), 3.82 (dd,  $J$  = 17.0, 1.0 Hz, 1H), 2.79 (d,  $J$  = 3.4 Hz, 3H), 2.55 – 2.36 (m, 3H);  $^{13}\text{C NMR}$  (101 MHz, DMSO)  $\delta$  166.5, 166.4, 165.5, 51.8, 51.7, 35.9, 33.5; **LCMS (ESI)**: Calculated for  $\text{C}_7\text{H}_{10}\text{N}_3\text{O}_4$   $[\text{M}-\text{H}]^-$ : 200.1; Found 200.1.

## 2.9 Synthesis of Boc-protected diketopiperazine S6

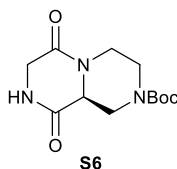

To a solution of Cbz-Gly-OH (1 eq., 236 mg, 1.13 mmol) in DCM (8 mL), under a nitrogen atmosphere and at 0  $^{\circ}\text{C}$ , was added HATU (473 mg, 1.24 mmol, 1.1 equiv) and DIPEA (394  $\mu$ L, 2.26 mmol, 2 equiv). After 30 min, a solution of (S)-1-tert-Butyl 3-methyl piperazine-1,3-dicarboxylate (276 mg, 1.13 mmol, 1 equiv) in DCM (1.6 mL) was added and the reaction was stirred at 0  $^{\circ}\text{C}$  for 1 h and at rt for 24 h. The mixture was then diluted with EtOAc (100 mL) and the organic phase was washed in order with 1 M  $\text{KHSO}_4$  (2 \* 20 mL), aqueous  $\text{NaHCO}_3$  (2 \* 20 mL), and brine (2 \* 20 mL) and dried over  $\text{Na}_2\text{SO}_4$ , then volatiles

were removed under reduced pressure. The residue was purified by flash chromatography on silica gel (n-hexanes/EtOAc) to afford the desired product as a clear/light-yellow oil (386 mg). The product was slightly contaminated with tetramethylurea but was telescoped into the next step.

The compound obtained above was dissolved in MeOH (8 mL) and ammonium formate (20 eq., 1.12 g, 17.7 mmol). The suspension was placed under an atmosphere of N<sub>2</sub> and 10% Pd/C (177 mg) was added portion wise. The suspension was then refluxed for 20 hours and conversion was checked by TLC & LC-MS. The reaction mixture was filtered over celite which was washed with MeOH (100 mL). The filtrate was then concentrated under vacuo. The residue was purified by flash chromatography on silica gel (0-6% MeOH in DCM) to afford the desired product **S6** as a white solid (150 mg, 49% over two steps).

**<sup>1</sup>H NMR** (400 MHz, CDCl<sub>3</sub>) δ 6.85 (s, 1H), 4.66 – 4.50 (m, 2H), 4.22 – 4.10 (m, 1H), 4.08 (s, 2H), 4.00 – 3.91 (m, 1H), 2.87 – 2.66 (m, 3H), 1.48 (s, 9H); **<sup>13</sup>C NMR** (101 MHz, CDCl<sub>3</sub>) δ 164.8, 162.0, 154.2, 81.0, 56.5, 44.7, 41.3, 28.3. **LCMS (ESI)**: Calculated for C<sub>12</sub>H<sub>19</sub>N<sub>3</sub>NaO<sub>4</sub> [M+H]<sup>+</sup>: 292.1; Found 292.0; R<sub>f</sub> = 0.32 (10% MeOH in DCM).

## 2.10 Synthesis of diketopiperazine isoxazole 2a

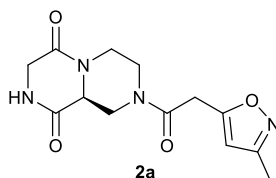

**S5** (1 equiv., 42 mg, 0.16 mmol) was placed in a round bottom flask in an ice-bath under argon and 4M HCl in dioxane (2 mL) was added. The ice-bath was removed and the reaction mixture was stirred at room temperature for 1 hour (Completion check by TLC). The solvent was removed under vacuo and the crude was used without purification.

Then to a solution of 3-Methyl-5-isoxazoleacetic acid (1.1 equiv., 24 mg, 0.17 mmol) in DMF (2.3 mL) were added triethylamine (3 equiv., 70 μL, 0.47 mmol), HOBt (1.25 equiv., 26 mg, 0.19 mmol), and EDCI (1.25 equiv., 37 mg, 0.19 mmol) and stirred for 10 min. Then, the above crude product (1 equiv., 32 mg, 0.156 mmol) in DMF (2.3 mL) was added. The reaction mixture was stirred at room temperature overnight. The reaction mixture was evaporated under vacuo. The crude was purified by silica gel chromatography (0-8% MeOH in DCM) to afford the desired product in a mixture with HOBt as an oil. This oil was dissolved in DCM and washed with saturated NaHCO<sub>3</sub>. The aqueous phase was extracted five times with DCM. The organic phases were combined, dried over Na<sub>2</sub>SO<sub>4</sub> and concentrated in vacuo to afford the desired product as a white solid (20 mg, 45%). This compound was obtained as a mixture of rotamers visible by NMR.

**<sup>1</sup>H NMR** (400 MHz, CDCl<sub>3</sub>) δ 8.31 (s, 1H, m), 8.25 (s, 1H, M), 6.22 (s, 1H, M), 6.21 (s, 1H, m), 4.69 (dd, J = 13.0, 3.8, 1H, M), 4.35 – 4.23 (m, 1H+2H, m+M), 4.21 – 3.77 (m, 6H, m+M), 3.26 (dd, J = 13.4, 10.8 Hz, 1H, m), 3.16 – 3.02 (m, 1H, M), 2.82 – 2.58 (m, 2H, m+M), 2.20 (s, 3H); **<sup>13</sup>C NMR** (101 MHz, DMSO) δ 167.15 (M), 167.09 (m), 166.2 (M+m), 164.58 (m), 164.53 (M), 163.5 (m), 163.4 (M), 159.94 (M), 159.92 (m), 104.6 (M+m), 56.13 (M), 56.09 (m), 48.0 (m), 44.9 (M), 44.5 (M), 44.3 (m), 41.2 (M), 40.9 (m), 32.0 (m), 31.84 (M), 11.44 (M+m); **LCMS (ESI)**: Calculated for C<sub>13</sub>H<sub>17</sub>N<sub>4</sub>O<sub>4</sub> [M+H]<sup>+</sup>: 293.1; Found 292.8.

## 2.11 Synthesis of hydrazone S7

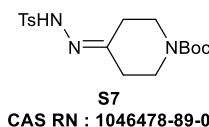

**S7**  
CAS RN : 1046478-89-0

To a solution of sulfonyl hydrazide (1.0 eqv) in MeOH (0.5M) was added ketone (1.0 eqv). The rxn mix was stirred at RT until complete conversion was observed by TLC. Solvents were removed in vacuum to give the title compound as a white solid (9.7 g, 98%).

**<sup>1</sup>H NMR** (400 MHz, CDCl<sub>3</sub>) δ 7.83 (dt, J = 8.6, 2.3 Hz, 2H), 7.36 – 7.29 (m, 2H), 3.57 – 3.40 (m, 4H), 2.49 – 2.32 (m, 7H), 1.44 (s, 9H); **LCMS (ESI)**: Calculated for C<sub>17</sub>H<sub>26</sub>N<sub>3</sub>O<sub>4</sub>S [M+H]<sup>+</sup>: 368.2; Found 367.9.



## 2.12 Synthesis of boronic acid **S8**

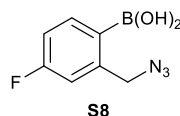

(2-(bromomethyl)-4-fluorophenyl)boronic acid (1 eq., 1 g, 4.31 mmol) was dissolved in THF (7 mL) and distilled water (2 mL). After the addition of sodium azide (3 eq., 0.84 g, 12.9 mmol), the reaction mixture was vigorously stirred at room temperature for 12 h. The resulting mixture was extracted with diethyl ether (40 mL) and the organic layer was washed with water (3 x 10 mL) and dried over Na<sub>2</sub>SO<sub>4</sub>. Solvent was evaporated under reduced pressure to obtain **S8** as a white solid (620 mg, 75%).

<sup>1</sup>H NMR (400 MHz, CDCl<sub>3</sub>) δ 8.31 – 8.21 (m, 1H), 7.26 – 7.16 (m, 2H), 4.87 (s, 2H); <sup>13</sup>C NMR (101 MHz, CDCl<sub>3</sub>) δ 165.7 (d, J = 254.7 Hz), 145.7 (d, J = 8.0 Hz), 140.1 (d, J = 9.1 Hz), 116.9 (d, J = 21.4 Hz), 115.2 (d, J = 20.0 Hz), 53.7.

## 2.13 Synthesis of spiro-indoline **S9**

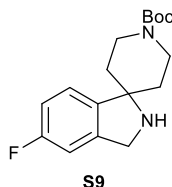

A pressure tube provided with a stir bar was charged with boronic acid **S7** (3 eq., 478 mg, 2.452 mmol) and LiOMe (3 eq., 92 mg, 2.452 mmol) in dry dioxane (5 mL) under an argon atmosphere. The tube was heated at 120 °C and a solution of N-sulfonylhydrazone (1 eq., 300 mg, 0.82 mmol) dissolved in dry dioxane (5 mL) was added with a syringe pump (0.25 mL/h). Once the addition was finished, the tube was heated at 120 °C for 16 hours. The reaction mixture was then cooled down to room temperature and to the mixture was added 10 mL of EtOAc and 5 mL 1M HCl and vigorously stirred. The layers were separated, and the organic phase was extracted three more times with 5 mL of 1M HCl. The organic phase was discarded. The combined aqueous acidic phase was treated with EtOAc (10 mL). To the mixture was added a solution of aqueous 3M NaOH until the aqueous phase reached basic pH > 10. The layers were separated, and the basic aqueous phase was extracted three times with EtOAc (3 x 10 mL). The combined basic organic phases were washed with brine, dried over Na<sub>2</sub>SO<sub>4</sub> and concentrated under reduced pressure to give the product. After column chromatography (EtOAc in hexanes) compound **S9** was obtained as a gummy solid (130 mg, 52 %).

<sup>1</sup>H NMR (400 MHz, CDCl<sub>3</sub>) δ 7.10 – 7.03 (m, 1H), 6.97 – 6.88 (m, 2H), 4.17 (s, 2H), 4.15 – 3.99 (m, 2H), 3.11 (t, J = 11.5 Hz, 2H), 2.04 – 1.97 (m, 1H), 1.83 (td, J = 12.9, 4.0 Hz, 2H), 1.65 – 1.54 (m, 2H), 1.50 (s, 9H); <sup>13</sup>C NMR (101 MHz, CDCl<sub>3</sub>) δ 162.5 (d, J = 244.1 Hz), 154.9, 144.2 (d, J = 2.2 Hz), 143.8 (d, J = 8.0 Hz), 122.3 (d, J = 9.1 Hz), 113.9 (d, J = 22.9 Hz), 109.6 (d, J = 22.5 Hz), 79.6, 64.3, 50.2, 50.2, 40.7, 36.8, 28.5.; **LCMS (ESI)**: Calculated for C<sub>17</sub>H<sub>24</sub>FN<sub>2</sub>O<sub>2</sub> [M+H]<sup>+</sup>: 307.2; Found 306.8.

**LCMS (ESI)**: Calculated for C<sub>22</sub>H<sub>26</sub>FN<sub>3</sub>NaO<sub>4</sub> [M+Na]<sup>+</sup>: 438.2; Found 437.7.

## 2.14 Synthesis of Acetylated isoxazole spiro-indoline **3a**

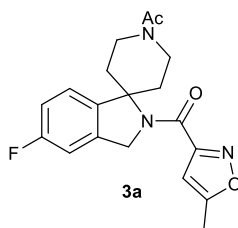

5-Methyl-isoxazole-3-carboxylic acid (1 eq., 6 mg, 0.049 mmol) was added to a solution of S8 (1 eq., 15 mg, 0.049 mmol), DIPEA (2.1 eq., 17.89  $\mu$ L, 0.65 mmol), HATU (1.1 eq., 20.49 mg, 0.054 mmol) in DCM (0.5 mL). The resulting mixture was stirred at room temperature for 12 h. The mixture was concentrated and used without further purification.

The above crude was dissolved in DCM (0.3 mL), and 4 N HCl in 1,4-dioxane (0.1 mL) was added. After 12 h, the reaction mixture was concentrated to give a white solid which was used in the next step without purification.

To a solution of the previous crude (1 eq., 16 mg, 0.051 mmol) and triethylamine (2 eq., 14.241  $\mu$ L, 0.101 mmol) in DCM (0.3 mL) at 0 °C, acetyl chloride (1.2 eq., 4.333  $\mu$ L, 0.0609 mmol) was added dropwise, and the resulting reaction mixture was allowed to warm to room temperature while stirring overnight (18 h). After this time, saturated NaHCO<sub>3</sub> was added, and the biphasic system was separated. The aqueous phase was extracted with DCM (three times) and the organic phases were combined, dried over Na<sub>2</sub>SO<sub>4</sub>, filtered and concentrated under reduced pressure. The resulting crude material was purified by flash column chromatography on silica gel (20% EtOAc on hexanes) to afford the desired compound **3a** (9 mg, 65%)

<sup>1</sup>H NMR (400 MHz, CDCl<sub>3</sub>)  $\delta$  7.35 (dd, J = 8.6, 4.8 Hz, 1H), 7.04 (td, J = 8.8, 2.6 Hz, 1H), 7.00 – 6.92 (m, 1H), 6.41 (d, J = 1.0 Hz, 1H), 5.28 (d, J = 16.0 Hz, 1H), 5.21 (d, J = 16.0 Hz, 1H), 4.20 – 4.10 (m, 1H), 4.08–3.99 (m, 1H), 3.74 – 3.57 (m, 2H), 3.23–3.10 (m, 2H), 2.51 (d, J = 1.0 Hz, 4H), 2.19 (s, 3H), 1.93 (ddd, J = 14.0, 6.8, 4.4 Hz, 1H), 1.78 (dt, J = 13.6, 4.3 Hz, 1H); <sup>13</sup>C NMR (101 MHz, CDCl<sub>3</sub>)  $\delta$  169.9, 169.8, 162.8 (d, J = 246.7 Hz), 160.6, 159.1, 140.4 (d, J = 2.9 Hz), 136.7 (d, J = 8.7 Hz), 124.1 (d, J = 8.7 Hz), 115.4 (d, J = 22.5 Hz), 109.8 (d, J = 23.6 Hz), 103.1, 68.8, 54.0 (d, J = 2.9 Hz), 42.4, 38.0, 33.9, 31.7, 21.8, 12.1; LCMS (ESI): Calculated for C<sub>19</sub>H<sub>21</sub>FN<sub>3</sub>O<sub>3</sub> [M+H]<sup>+</sup>: 358.15; Found 357.8.

## 2.15 Synthesis of hydrazone S10

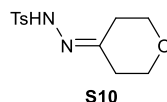

To a solution of sulfonyl hydrazide (1.0 equiv., 5.02 g, 29.2 mmol) in MeOH (0.5 M) was added the tetrahydro-4H-pyran-4-one (1.0 equiv., 2.92 g, 29.2 mmol). The reaction mixture was stirred at room temperature until complete conversion was observed by TLC. Solvents were removed in vacuum to give the title compound as a white solid (7.6 g, 97 %).

Analyses were in accordance with literature.<sup>2</sup>

## 2.16 Synthesis of spiro-indoline S10

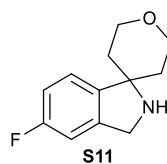

A pressure tube provided with a stir bar was charged with boronic acid S7 (3 eq., 478 mg, 2.452 mmol) and LiOMe (3 eq., 92 mg, 2.452 mmol) in dry dioxane (5 mL) under an argon atmosphere. The tube was heated at 120 °C and a solution of N-sulfonylhydrazone (1 eq., 300 mg, 0.82 mmol) dissolved in dry dioxane (5 mL) was added with a syringe pump (0.25 mL/h). Once the addition was finished, the tube was heated at 120 °C for 16 hours. The reaction mixture was then cooled down to room temperature and to the mixture was added 10 mL of EtOAc and 5 mL 1M HCl and vigorously stirred. The layers were separated, and the organic phase was extracted three more times with 5 mL of 1M HCl. The organic phase was discarded. The combined aqueous acidic phase was treated with EtOAc (10 mL). To the mixture was added a solution of aqueous 3M NaOH until the aqueous phase reached basic pH > 10. The layers were separated, and the basic aqueous phase was extracted three times with EtOAc (3 x 10 mL). The combined basic organic phases were washed with brine, dried over Na<sub>2</sub>SO<sub>4</sub> and concentrated under reduced pressure to give the product. After column chromatography (EtOAc in hexanes) compound **S10** was obtained as a brown oil (118 mg, 51%).

<sup>1</sup>H NMR (400 MHz, CDCl<sub>3</sub>)  $\delta$  7.09 (dd, J = 6.9, 4.9 Hz, 1H), 6.98 – 6.81 (m, 1H), 4.16 (d, J = 1.1 Hz, 2H), 4.00 – 3.87 (m, 2H), 3.83 – 3.72 (m, 2H), 2.01 (dddd, J = 13.7, 12.3, 5.0, 1.5 Hz, 2H), 1.52 (ddd, J = 13.6, 2.4, 1.3 Hz, 2H); <sup>13</sup>C NMR (101 MHz, CDCl<sub>3</sub>)



## 2.19 Synthesis of spiro-indoline hydroxamic acid **3c**

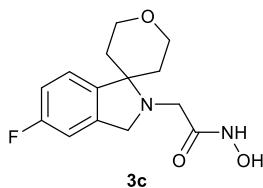

To a solution of **S11** (1 eq., 10 mg, 0.027 mmol) in MeOH (2 mL) flushed with nitrogen was added 10% Pd/C (6 mg, 60% w/w). In the reaction mixture was bubbled hydrogen and it was stirred at room temperature for 6 hours. Completion was checked by TLC (10% MeOH in DCM). The reaction mixture was filtered over celite and washed with MeOH. The product was purified by semi-prep HPLC (6 min gradient from 5% ACN in H<sub>2</sub>O to 95% ACN in H<sub>2</sub>O) to give **3c** as a white solid (5.5 mg, 73%).

**<sup>1</sup>H NMR** (400 MHz, DMSO)  $\delta$  10.42 b(s, 1H), 8.74 (bs, 1H), 7.72 (dd,  $J$  = 8.4, 5.1 Hz, 1H), 7.17 (dd,  $J$  = 8.9, 2.7 Hz, 1H), 7.02 (ddd,  $J$  = 9.4, 8.5, 2.8 Hz, 1H), 3.98 (s, 2H), 3.92 – 3.71 (m, 4H), 3.21 (s, 2H), 1.86 (ddd,  $J$  = 13.6, 10.9, 5.8 Hz, 2H), 1.53 – 1.42 (m, 2H); **<sup>13</sup>C NMR** (101 MHz, DMSO)  $\delta$  167.2, 161.8 (d,  $J$  = 241.6 Hz), 144.0 (d,  $J$  = 2.5 Hz), 142.1 (d,  $J$  = 8.7 Hz), 124.6 (d,  $J$  = 8.7 Hz), 113.3 (d,  $J$  = 21.8 Hz), 110.3 (d,  $J$  = 22.5 Hz), 64.5, 64.1, 55.9, 50.1, 32.7; **LCMS (ESI)**: Calculated for C<sub>14</sub>H<sub>18</sub>FN<sub>2</sub>O<sub>3</sub> [M+H]<sup>+</sup>: 281.1; Found: 280.8.

### 3 Computational procedures

#### 3.1 General information

PDB files for each protein (.cif, .mtz and .pdb) were downloaded from the PDB website (HDAC6: 5EDU<sup>3</sup>, BRD4: 4BW1<sup>4</sup> and EZH2: 5IJ7<sup>5</sup>). Receptors were prepared using the MakeReceptor software from the OpenEye suite. Water molecules were included during the preparation of the receptor and no constraints were selected.

Molecular properties were calculated using the RDKit Descriptor Calculation node in Knime.

#### 3.2 Selection and tuning of the evaluation sub-functions $\lambda$

Example of the influence of parameters **a** and **b** for evaluation sub-functions based on  $\lambda = 1 + \tanh[a * (x - b)]$

- Parameter **b** defines where the sub-evaluation function  $\lambda$  will reach 50% of its maximal value.
- Parameter **a** define the slope of the curve between both “plateau” (red dotted line).

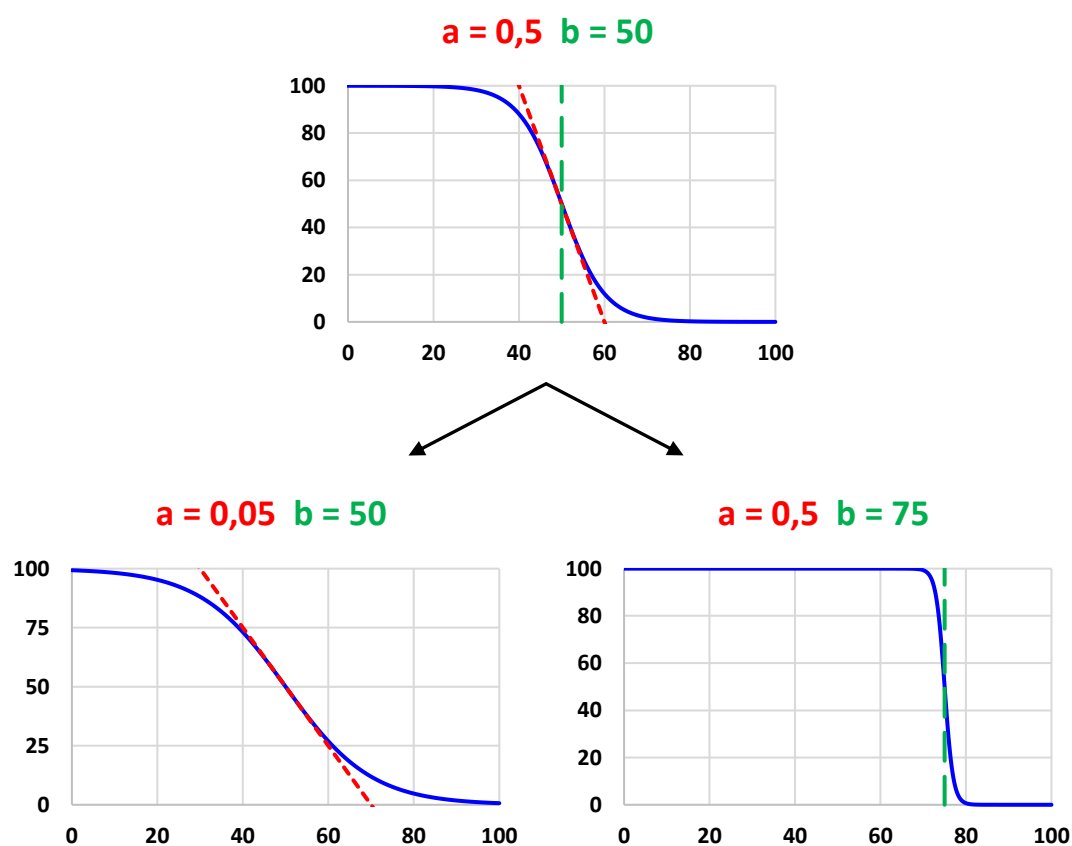

**Figure S1.** Impact of parameters **a** and **b** on our evaluation sub-functions.

Those parameters were tuned as follows:

- The parameter **b** was selected around the middle point between the limits for lead-likeness and drug-likeness. Taking molecular weight as an example, as the “limits” for lead-likeness and drug-likeness are 300 g.mol<sup>-1</sup> and 500 g.mol<sup>-1</sup> respectively, we selected **b** = 400 in the corresponding evaluation sub-function.
- Then the parameter **a** was tuned to obtain an evaluation score of  $\lambda = 95$  when the molecular property was equal to the lead-likeness limit. For the molecular weight, with  $a \approx 0.015$ ,  $\lambda_{MW} \approx 95$  for a molecular weight of 300 g.mol<sup>-1</sup>.

In the end, the following evaluation sub-functions  $\lambda_i$  were used:

|                            |                                                                       |
|----------------------------|-----------------------------------------------------------------------|
| Molecular weight:          | $\lambda_{MW} = 50 * (1 - \tanh(0.015 * [x - 400]))$                  |
| H-bond donor:              | $\lambda_{HBD} = 50 * (1 - \tanh(1.18 * [x - 4.25]))$                 |
| H-bond acceptor:           | $\lambda_{HBA} = 50 * (1 - \tanh(0.37 * [x - 7]))$                    |
| Number of rotatable bonds: | $\lambda_{RotB} = 50 * (1 - \tanh(0.37 * [x - 7]))$                   |
| Number of aromatic rings:  | $\lambda_{ArRing} = 50 * (1 - \tanh(1.47 * [x - 3]))$                 |
| Fraction $sp^3$ :          | $\lambda_{Fsp3} = 50 * (1 + \tanh(14.7 * [x - 0.4]))$                 |
| TPSA:                      | $\lambda_{TPSA} = 50 * (1 - \tanh(0.037 * [x - 100]))$                |
| LogP:                      | $\lambda_{LogP} = 50 * (1 - \tanh(1.5 * [x - 4]))$ for $LogP > 0$     |
|                            | $\lambda_{LogP} = 50 * (1 - \tanh(5.76 * [x + 1]))$ for $LogP \geq 0$ |

### 3.3 Design of the sub-evaluation function for global 3D-ness

As explained in the main text, we also aimed to reward sphere-like compounds against rod- or disk-like molecules. To do so, we decided to score each candidate on its position in a PMI plot. We thus designed an evaluation function based on the following equation:

$$\lambda_{PMI} = e^{-\frac{(\frac{I_1}{I_3}-1)^2}{0.6} - \frac{(\frac{I_2}{I_3}-1)^2}{0.2}}$$

**Equation S1.** PMI Scoring function 2D-representation.

This function can be represented in a 2D-environment using level sets where we can see that compounds in the up-right corner will obtain the highest scores and the further molecules get from this corner, the lower their score.

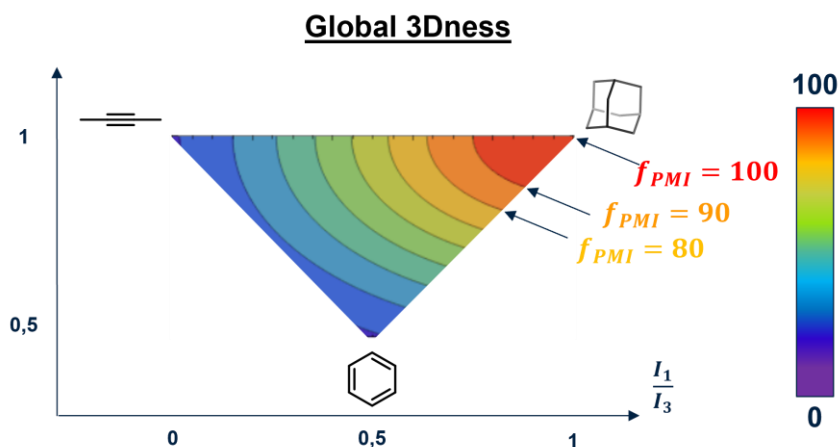

Figure S2. PMI Scoring function 2D-representation.

### 3.4 Optimisation and Expression of the evaluation function $\Lambda$

To select an efficient and rationale expression for our evaluation function  $\Lambda$ , we first tested three different possibilities:

- An arithmetic average:  $\frac{1}{n} * \sum_{i=1}^n \lambda_i$
- A quadratic average:  $\sqrt{\frac{1}{n} * \sum_{i=1}^n \lambda_i^2}$
- A geometric average:  $\sqrt[n]{\prod_{i=1}^n \lambda_i}$

All three expressions were able to rank compounds as expected (Figure S4-6) but we decided on employing an arithmetic average as it gave the most balanced results amongst the three. The quadratic average was discarded as not strict enough since it awarded high  $\Lambda$  scores for even larger and complex molecules as seen in Figure S3-4. This can also be observed in the repartition of the compounds for different values of  $\Lambda$  where most of the molecules ended up in the first two intervals (Figure S5). On the other hand, the geometric average showed excellent ranking abilities but also proved to be too strict for high values of  $\Lambda$  with most compounds getting scores lower than 75. The geometric average also presented some issues by design as it consisted in the multiplication all evaluation sub-functions  $\lambda$  together, if any  $\lambda$  gave a score of 0 then  $\Lambda$  would directly be 0 as well.

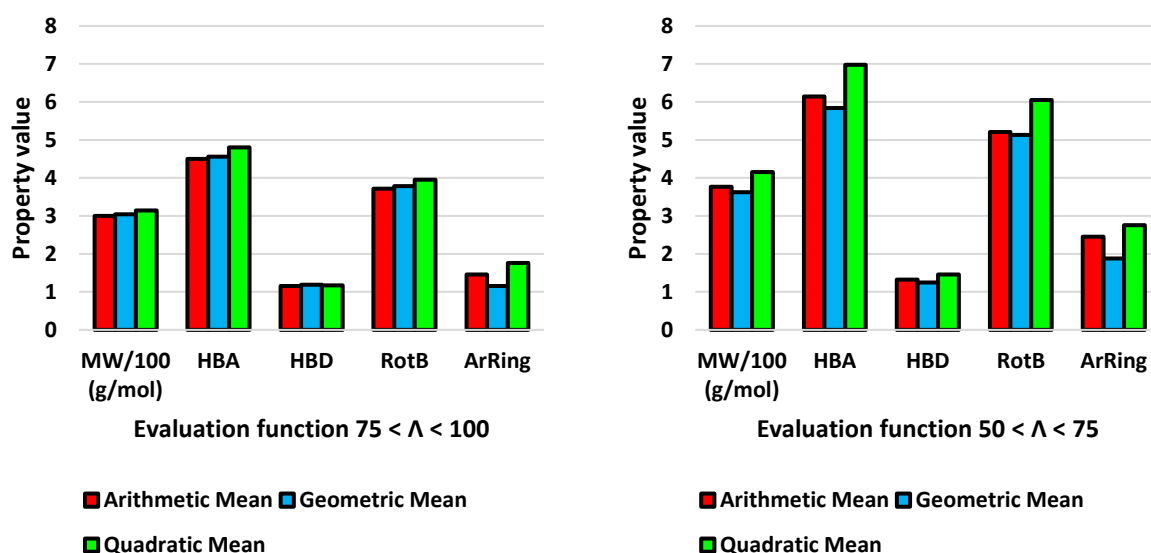

Figure S3. Mean properties obtained for  $75 < \Lambda < 100$  (left) and  $50 < \Lambda < 75$  (right) for the three averages considered.

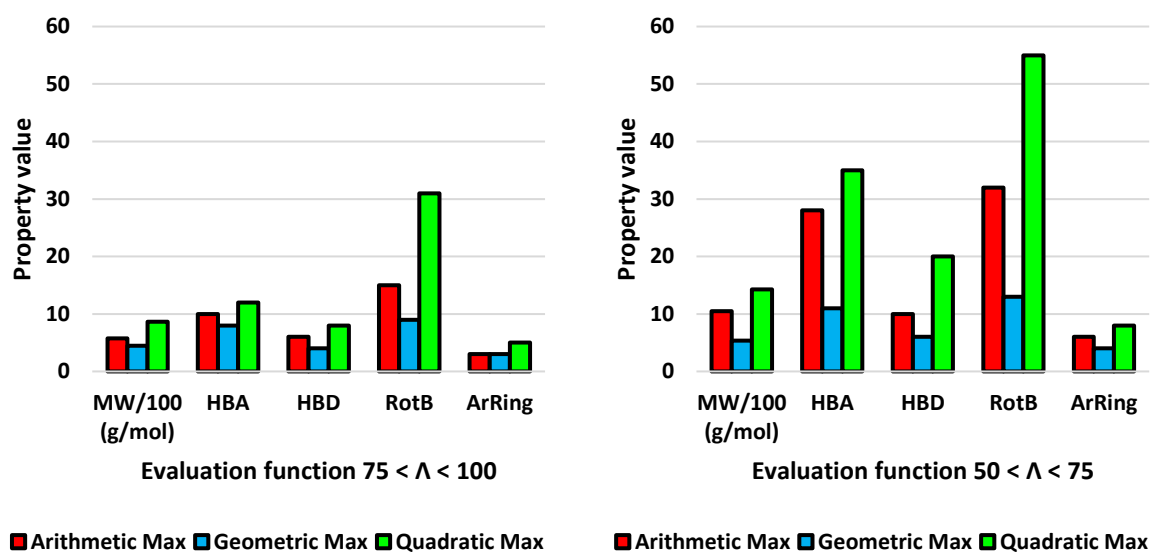

Figure S4. Max properties obtained for  $75 < \Lambda < 100$  and  $50 < \Lambda < 75$  (right) for the three averages considered.

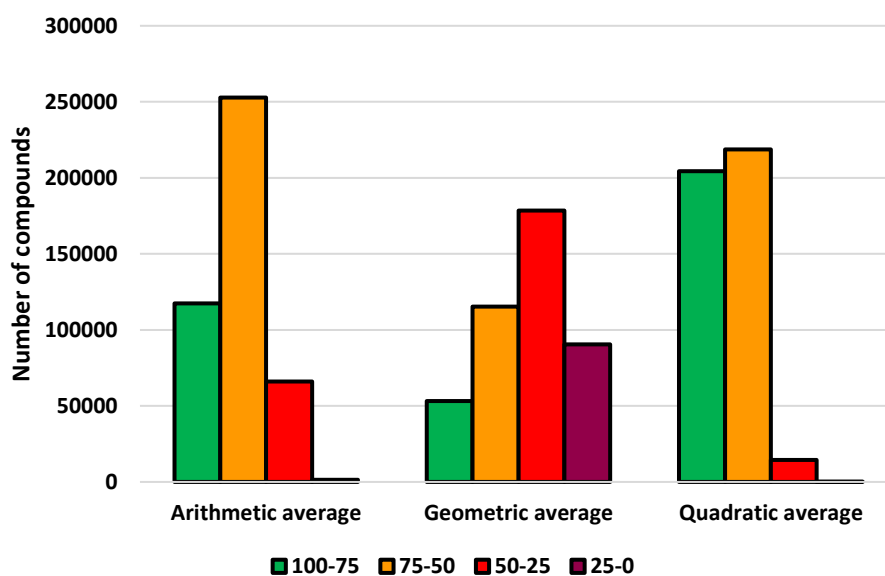

Figure S5. Repartition of the compounds of the MLSMR library amongst each interval of  $\Lambda$  for the three averages considered.

### 3.5 Application on the MLSMR

When comparing the properties of the starting MLSMR library with the properties of the molecules with a  $\Lambda > 75$ , we can also observe an improvement for all properties towards higher lead-likeness. The improvement is moderate with this example as the starting library was already mainly containing molecules with adequate properties.



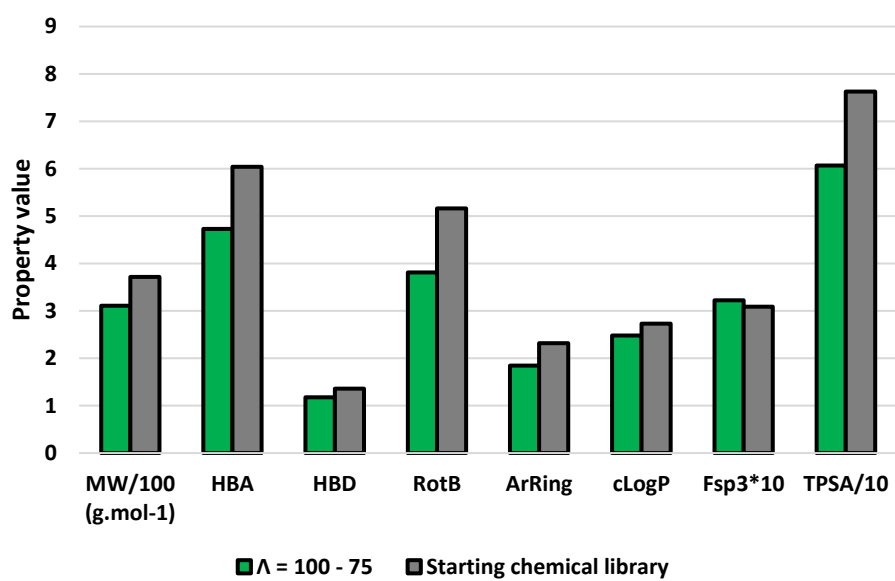

**Figure S6.** Improvement of the properties when selecting compounds with  $\Lambda > 75$  in the MLSMR

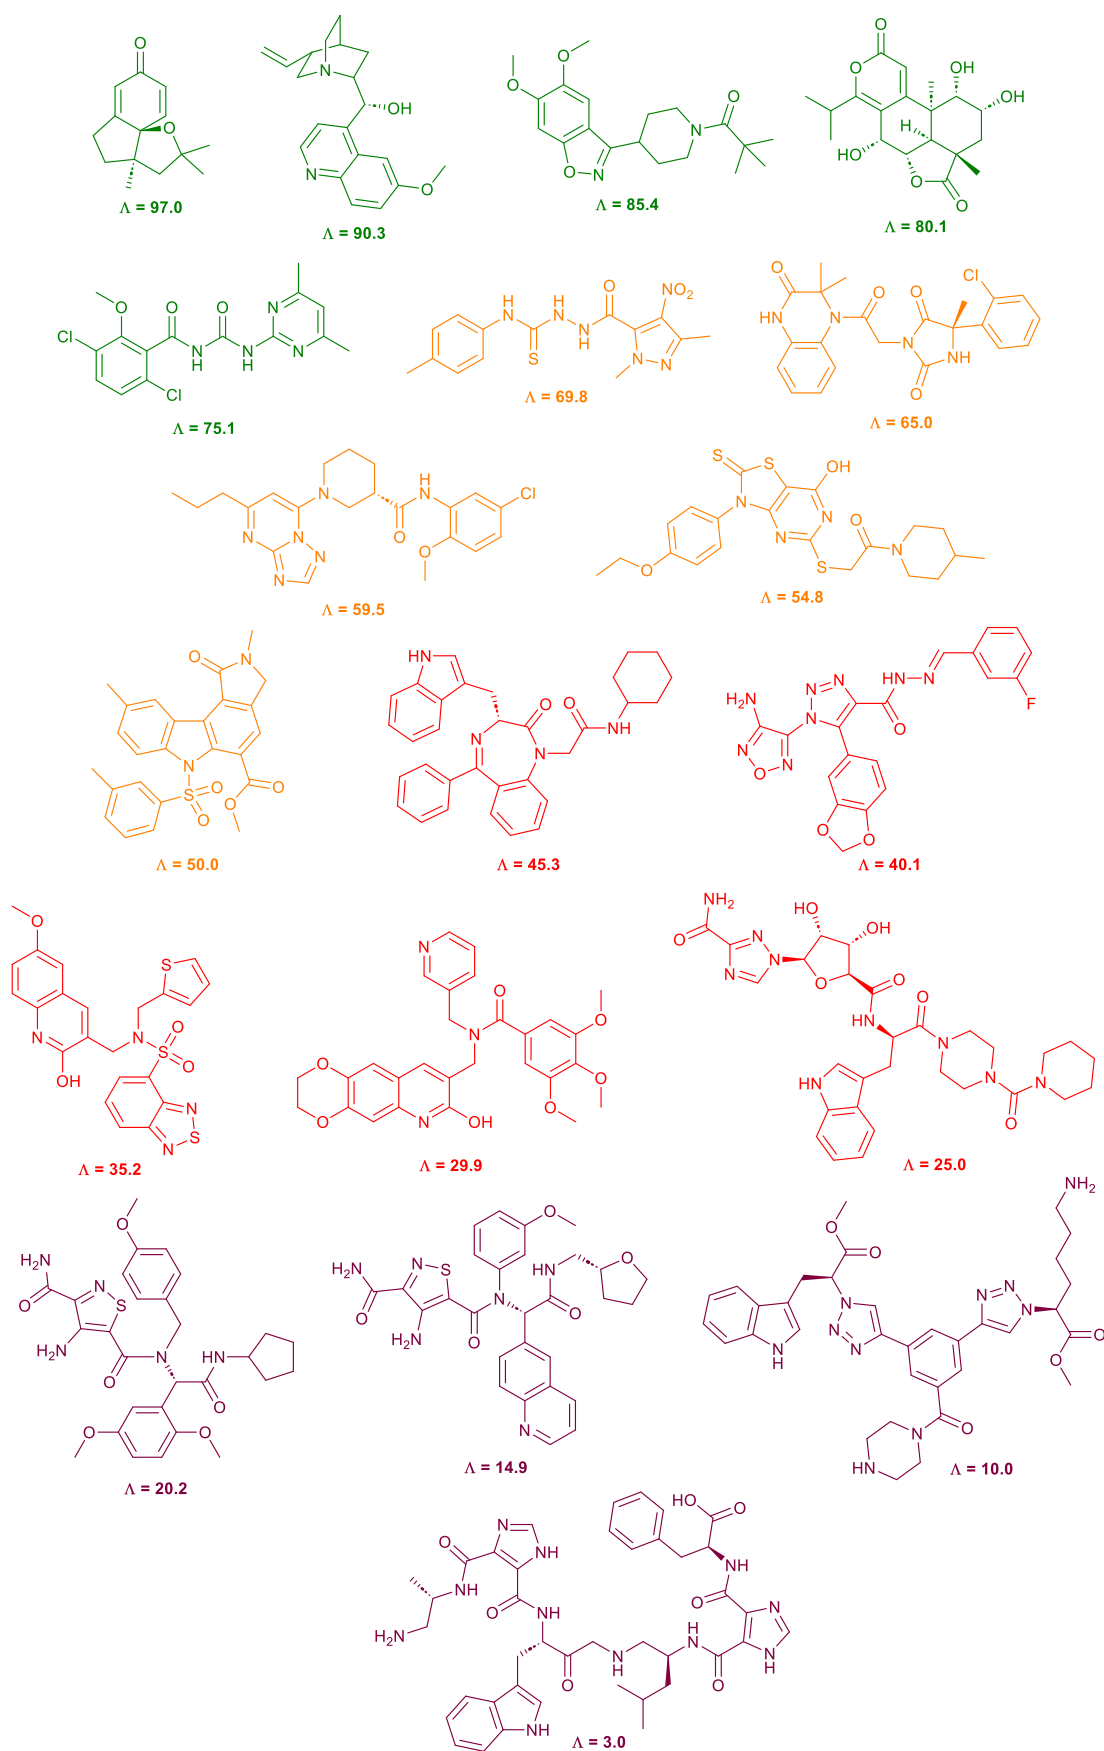

**Figure S7.** Examples of compounds from the MLSMR for different values of  $\Delta$

### 3.6 Relation between PMI scoring and other properties

We explored the properties of compounds with sphere-like 3D shape and observed a shift towards degraded molecular properties (less lead-like) which seems to validate the idea that PMI properties are driven by the main skeleton. However, we can also see that  $\lambda_{PMI}$  could be an interesting approach to target sphere-like compounds for chemical library design.

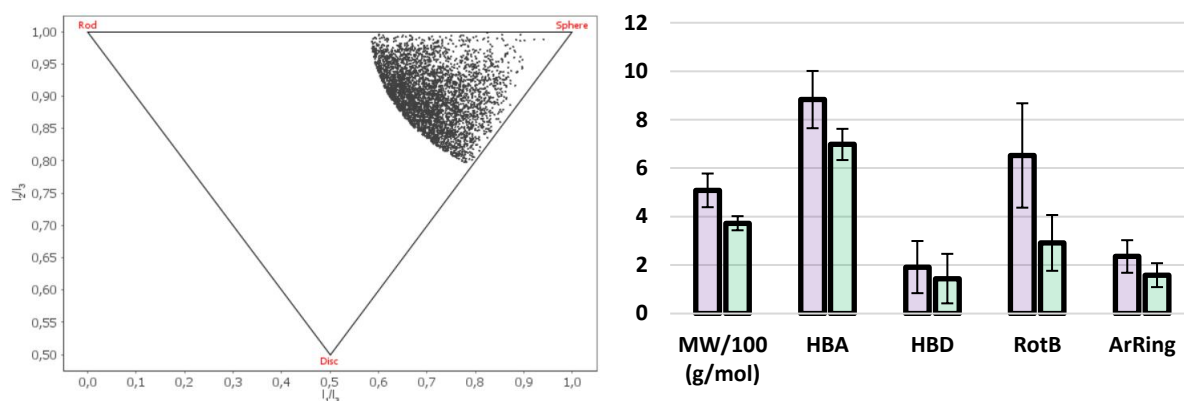

Figure S8. PMI plot and property distribution comparison for tetrahydroquinolines with  $\lambda_{PMI} > 75$  (purple, left) and  $\Delta > 75$  (green, right).

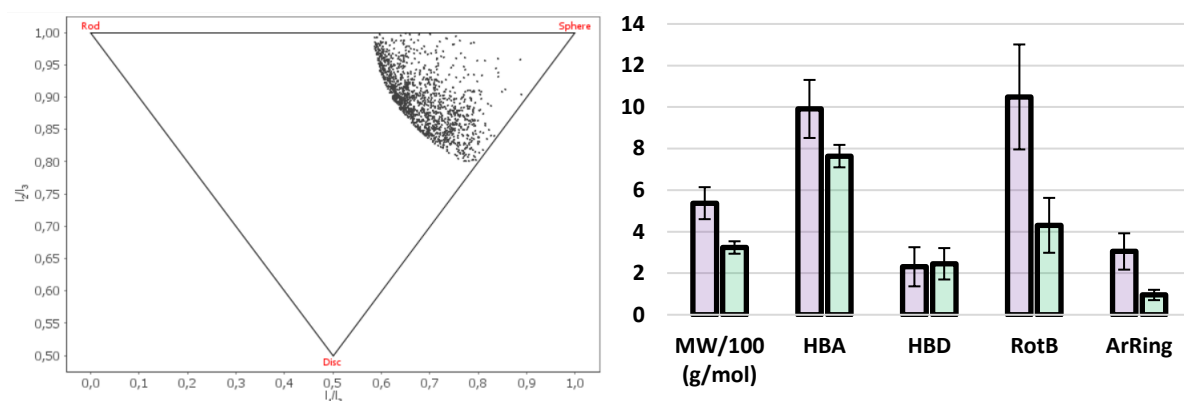

Figure S9. PMI plot and property distribution comparison for diketopiperazines with  $\lambda_{PMI} > 75$  (purple, left) and  $\Delta > 75$  (green, right).

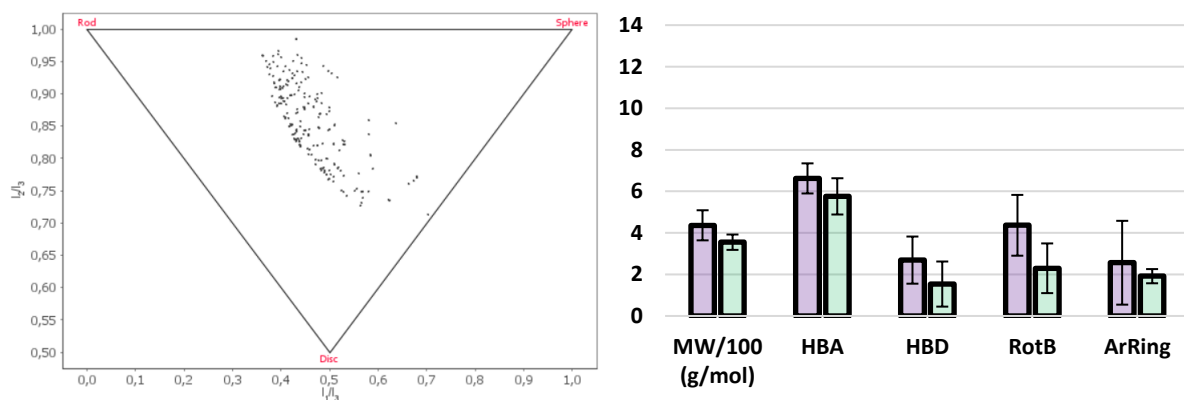

Figure S10. PMI plot and property distribution comparison for spiroindolines with  $\lambda_{PMI} > 50$  (purple, left) and  $\Delta > 75$  (green, right).

### 3.7 Benchmarking against LLAMA

To further validate our method, we tried to benchmark it against one of the few existing methods published in the literature to assess for lead-likeness, the LLAMA method described by the group of Adam Nelson in 2016. We compared our method with LLAMA using the MLSMR and the following score limits: LLAMA penalty score lower than 2 and a  $\Delta$  score above 75. A high overlap was found with 141,641 compounds succeeding with both methods of 223,305 molecules succeeding in at least one (Figure S11). We further analysed the remaining compounds (Figure S12) from each side and found that those selected by our method presented slightly better properties overall (except for cLogP) demonstrating the competitiveness of our method against one of the main strategies in the literature to drive synthetic efforts towards lead-likeness.

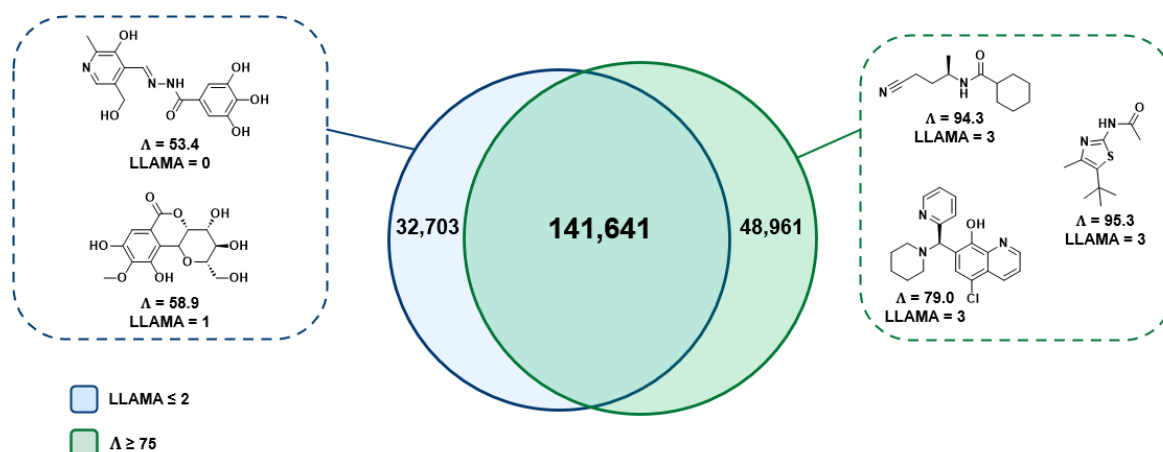

Figure S11. Examples of compounds from the MLSMR for different values of  $\Delta$

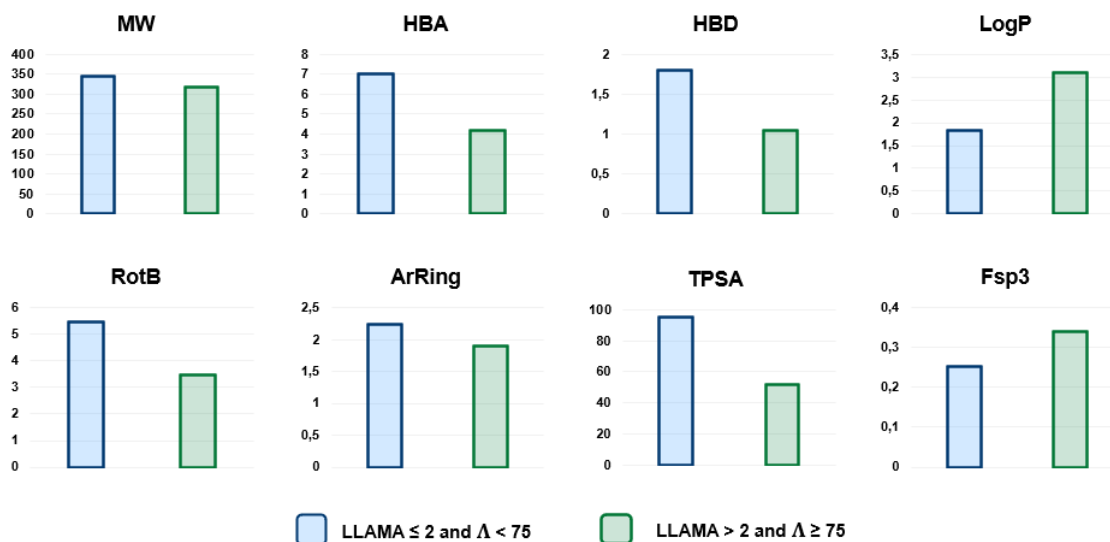

Figure S12. Examples of compounds from the MLSMR for different values of  $\Delta$

### 3.8 Correlation with Molecular complexity according to Böttcher<sup>6</sup>

Additionally, we checked for a potential correlation between our lead-likeness evaluation function  $\Lambda$  and the concept of molecular complexity as described by Thomas Böttcher in 2016.<sup>6</sup> This concept relies on information theory and doesn't depend on the parameters we used for our study (MW, HBD, HBA...). To do so, we randomly picked five hundred molecules from the MLSMR chemical library (five hundred numbers were generated using an RNG node in Knime, molecule indexes corresponding to those numbers were selected). Using the Böttcher Score Calculator available on the website of the ForliLab<sup>7</sup> from Scripps Research Institute we then plotted for each molecule their molecular complexity against their lead-likeness score  $\Lambda$ . Despite being two independent metrics, a correlation could be observed with an  $R^2$  of 0.55. This comparison shows that a high lead-likeness score  $\Lambda$  correlates with a lower molecular complexity.

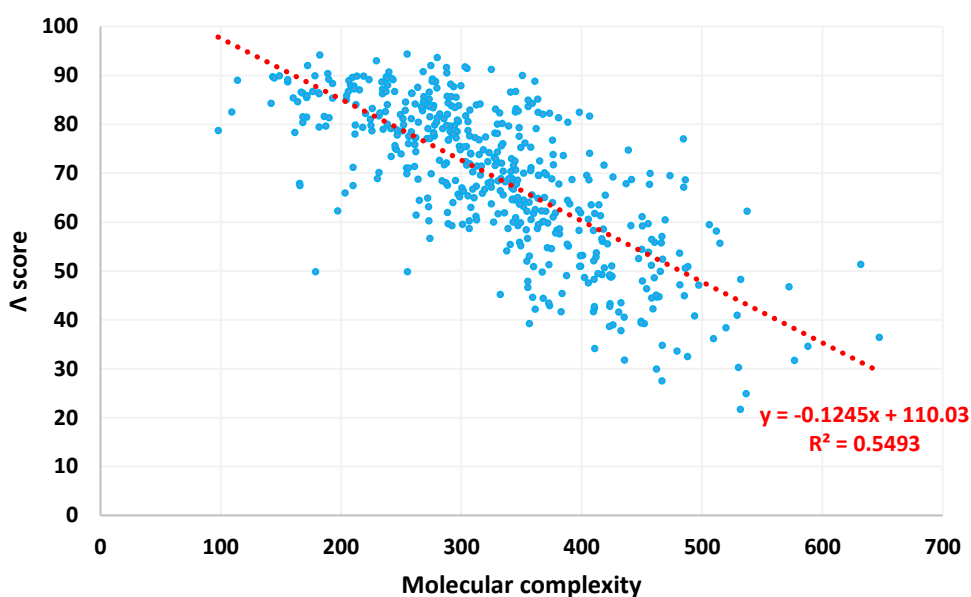

**Figure S13.** Correlation between molecular complexity and our lead-likeness score  $\Lambda$

### 3.9 Lead-likeness distribution in all three chemical libraries

The distribution for our lead-likeness evaluation function was assessed in all three libraries. The tetrahydroquinolines and diketopiperazines ones showed a gaussian distribution centered around  $\Lambda = 40$ -50. The spiroindoline was slightly shifted towards more lead-like compounds but it was also composed of 10 times less molecules which may biased the statistics.

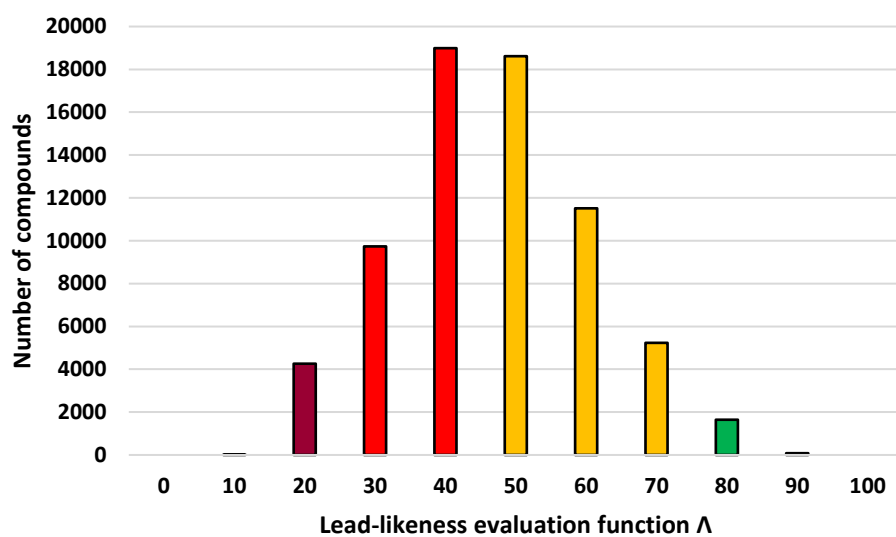

**Figure S14.** Lead-likeness distribution across the tetrahydroquinolines chemical library.

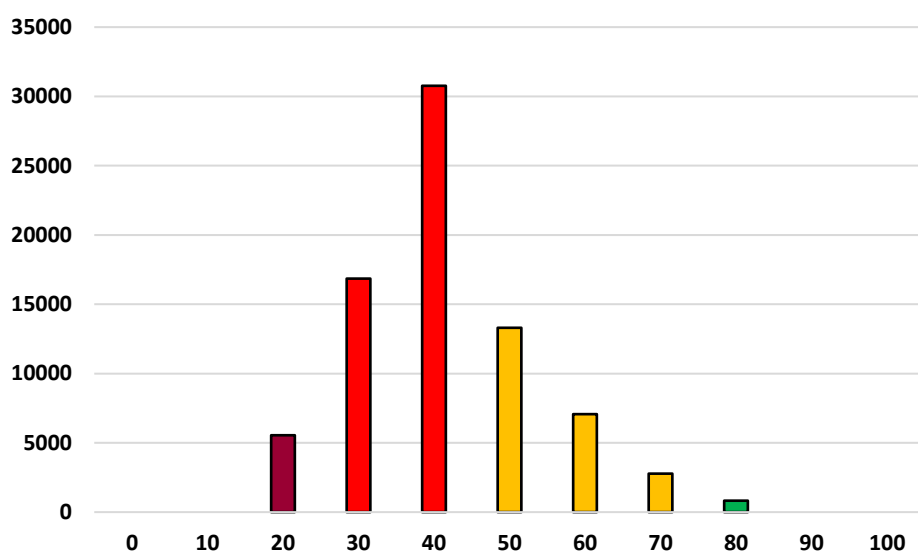

**Figure S15.** Lead-likeness distribution across the diketopiperazines chemical library.

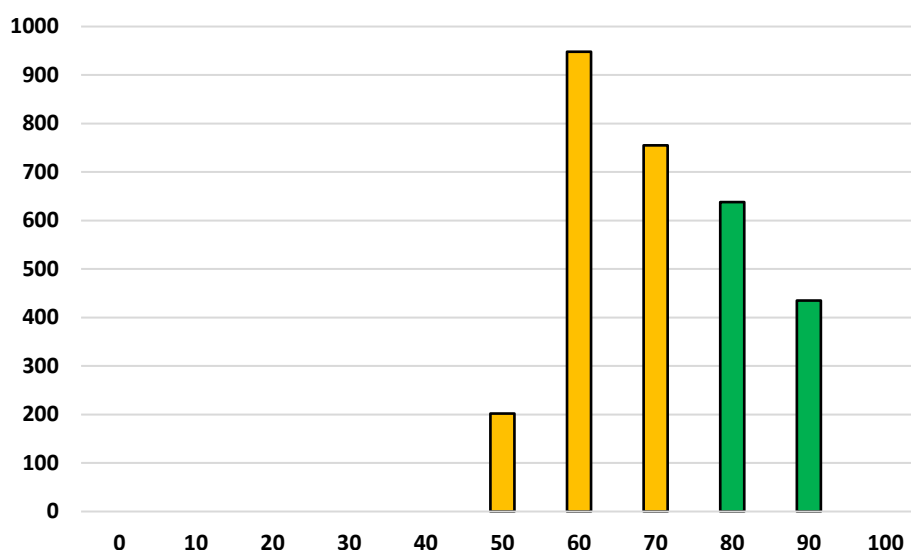

**Figure S16.** Lead-likeness distribution across the spiroindolines chemical library.

### 3.10 Generation of conformers using OEOMEGA

Conformers used in this study were generated using the OEOMEGA tool from the OpenEye suite. They were also modified to adopt the proper protonation state at a pH of 7.4 using the FILTER tool. To do so the following command line was used in OpenEye:

- `filter -filter filter.txt -pkanorm -in XXX.sdf -out XXX_pka.oeb.gz`
  - # The normalisation was performed with a personalised “filter.txt” written to accept all molecules.

One conformer was calculated for PMI plots while ten were calculated for docking studies using the following command line in OpenEye:

- `oeomega classic -in XXX_pka.oeb.gz -out XXX_pka_conf.oeb.gz -flipper true -progress dots -maxconfs Y`
  - # The option “-flipper true” allowed to generate stereoisomers, particularly on protonated quaternary ammoniums.
  - # The number of generated conformers was selected with the “-maxconfs Y”, Y being the number of conformers.

### 3.11 Docking study

#### 3.11.1 Command lines

We selected PDB files containing ligands exhibiting the isosteres of interests as shown in Figure S17 (green ligands).

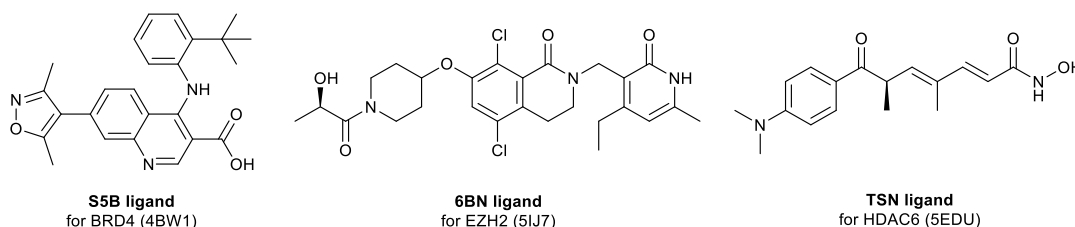

**Figure S17.** Structures of the ligands co-crystallised in each protein.

Docking experiments were performed with both FRED and HYBRID to obtain unbiased and biased results towards the isosteres we considered in this study. We used the following command lines in OpenEye for FRED and HYBRID respectively:

- fred -receptor rec\_XXX.oedu -dbase XXX\_pka\_conf.oeb.gz -dock\_resolution high -docked\_molecule\_file fred\_docked\_XXX.oeb.gz -score\_file fred\_score\_XXX.txt -hitlist\_size 0
- hybrid -receptor rec\_XXX.oedu -dbase XXX\_pka\_conf.oeb.gz -dock\_resolution high -docked\_molecule\_file hybrid\_docked\_XXX.oeb.gz -score\_file hybrid\_score\_XXX.txt -hitlist\_size 0
  - # We used the option “-hitlist\_size 0” to obtain the docking scores and poses of all compounds.

Docking poses and scores were then analysed manually by VIDA.

### 3.11.2 Docking poses for selected compounds

#### ▪ Docking poses into BRD4

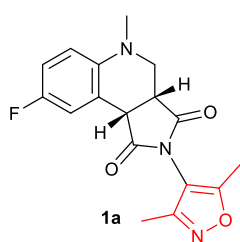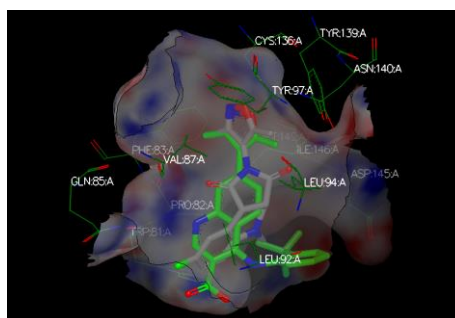

**Figure S18.** Best docking pose for **1a** in BRD4 (PDB = 4BW1) obtained with HYBRID.

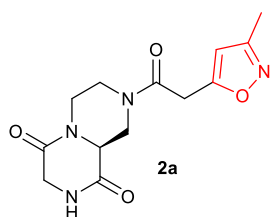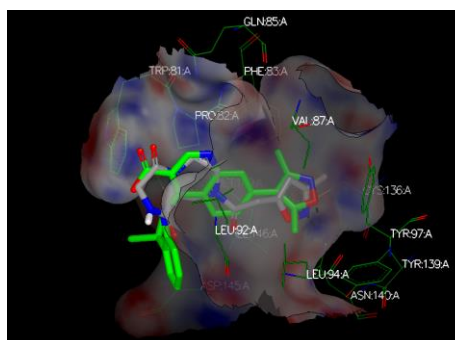

**Figure S19.** Best docking pose for **2a** in BRD4 (PDB = 4BW1) obtained with HYBRID.

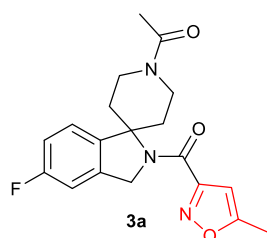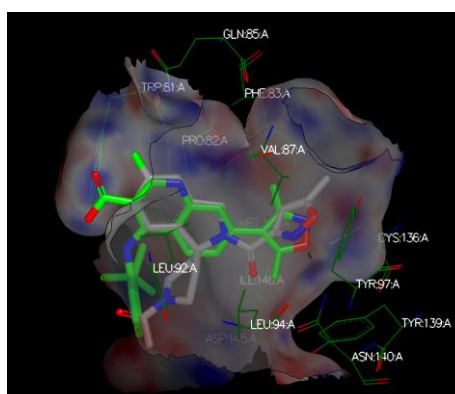

**Figure S20.** Best docking pose for **3a** in BRD4 (PDB = 4BW1) obtained with HYBRID.

#### ▪ Docking poses into EZH2



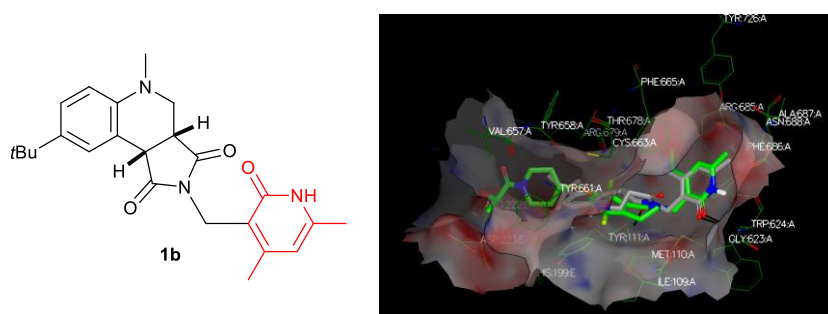

**Figure S21.** Best docking pose for **1b** in EZH2 (PDB = 5IJ7) obtained with HYBRID.

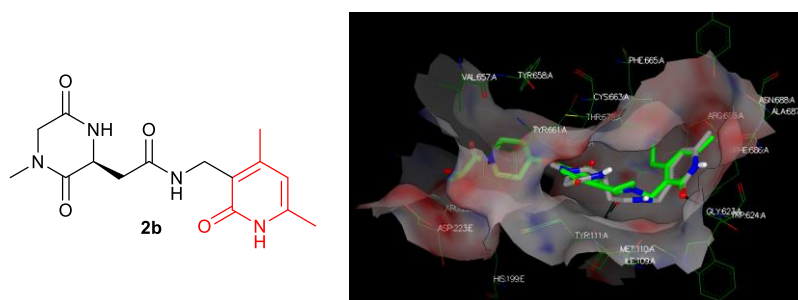

**Figure S22.** Best docking pose for **2b** in EZH2 (PDB = 5IJ7) obtained with HYBRID.

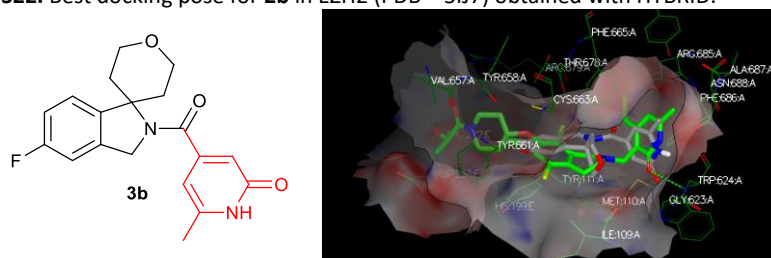

**Figure S23.** Best docking pose for **3b** in EZH2 (PDB = 5IJ7) obtained with HYBRID.

#### ▪ Docking poses into HDAC6

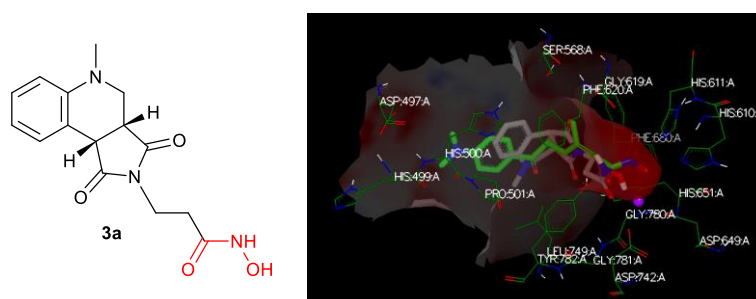

**Figure S24.** Best docking pose for **3a** in HDAC6 (PDB = 5EDU) obtained with HYBRID.

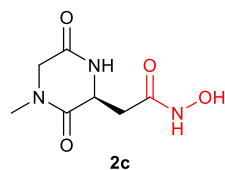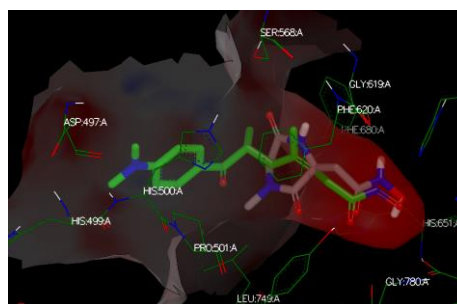

**Figure S25.** Best docking pose for **2c** in HDAC6 (PDB = 5EDU) obtained with HYBRID.

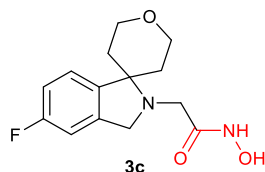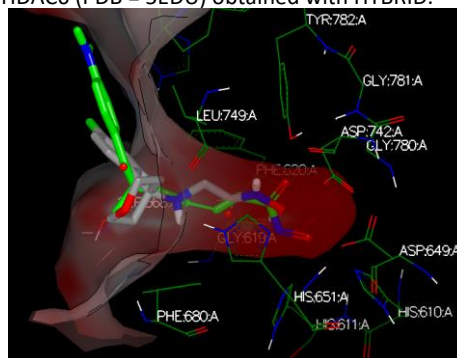

**Figure S26.** Best docking pose for **3c** in HDAC6 (PDB = 5EDU) obtained with HYBRID.

### 3.12 Biological evaluation

#### EZH2 Complex

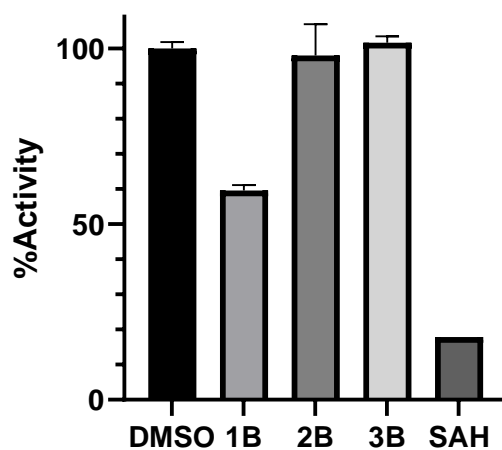

**Figure S27.** Activity Assay for EZH2 methyltransferase Activity on core histones. Compounds were tested in duplicate at 100  $\mu$ M.

Compounds **1-3b** were evaluated in a EZH2 Methyltransferase Assay via radiometric HotSpot™ by Reaction Biology. Compounds were provided as a DMSO stock solution (10 mM) and tested in a single-dose mode, in duplicate, at 100  $\mu$ M. Control compound, SAH (S-(5'-Adenosyl)-L-homocysteine) was tested in 10-dose IC<sub>50</sub> mode with 3-fold serial dilution starting at 100  $\mu$ M. Reactions were carried out at 1  $\mu$ M SAM.

|                                       |                             | Enzyme % Activity (relative to DMSO controls) |         |
|---------------------------------------|-----------------------------|-----------------------------------------------|---------|
| Methyltransferase:                    |                             | EZH2 Complex                                  |         |
| Methyltransferase Concentration (nM): |                             | 5                                             |         |
| Substrate:                            |                             | Core Histone                                  |         |
| Substrate Concentration:              |                             | 0.05 mg/mL                                    |         |
| Compound ID:                          | Testing Concentration (μM): | Data 1:                                       | Data 2: |
| 1b                                    | 100                         | 60,60                                         | 58,46   |
| 2b                                    | 100                         | 104,29                                        | 91,66   |
| 3b                                    | 100                         | 100,34                                        | 102,91  |
| SAH Control                           | 100                         | 17.87                                         |         |

## 4 References

- [1] A. I. Green and G. M. Burslem *RSC Med. Chem.*, 2021, **12**, 1780-1786.
- [2] (a) L. López, M.-P. Cabal and C. Valdés *Angew. Chem. Int. Ed.* 2022, **61**, e202113370. (b) R. Barroso, M. P. Cabal, R. Badía-Laiño and C. Valdés *Chem. Eur. J.* 2015, **21**, 16463–16473.
- [3] Y. Hai and D. W. Christianson *Nat. Chem. Bio.* 2016, **12**, 741-747.
- [4] O. Mirguet, Y. Lamotte, C.-W. Chung, P. Bamborough, D. Delannée, A. Bouillot, F. Gellibert, G. Krysa, A. Lewis, J. Witherington, P. Huet, Y. Dudit, L. Trotter and E. Nicodeme *ChemMedChem* 2013, **9**, 580-589.
- [5] A. Brooun, K. S. Gajiwala, Y.-L. Deng, W. Liu, B. Bolaños, P. Bingham, Y.-A. He, W. Diehl, N. Grable, P.-P. Kung, S. Sutton, K. A. Maegley, X. Yu and A. E. Stewart *Nat. Comm.* 2016, **7**, e11384.
- [6] T. Böttcher *J. Chem. Inf. Model.* 2016, **56**, 462–470.
- [7] R. M. Demoret, M. A. Baker, M. Ohtawa, S. Chen, C. C. Lam, S. Khom, M. Roberto, S. Forli, K. N. Houk and R. A. Shenvi *J. Am. Chem. Soc.* 2020, **142**, 18599–18618.

## 5 NMR spectra

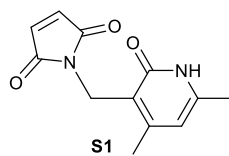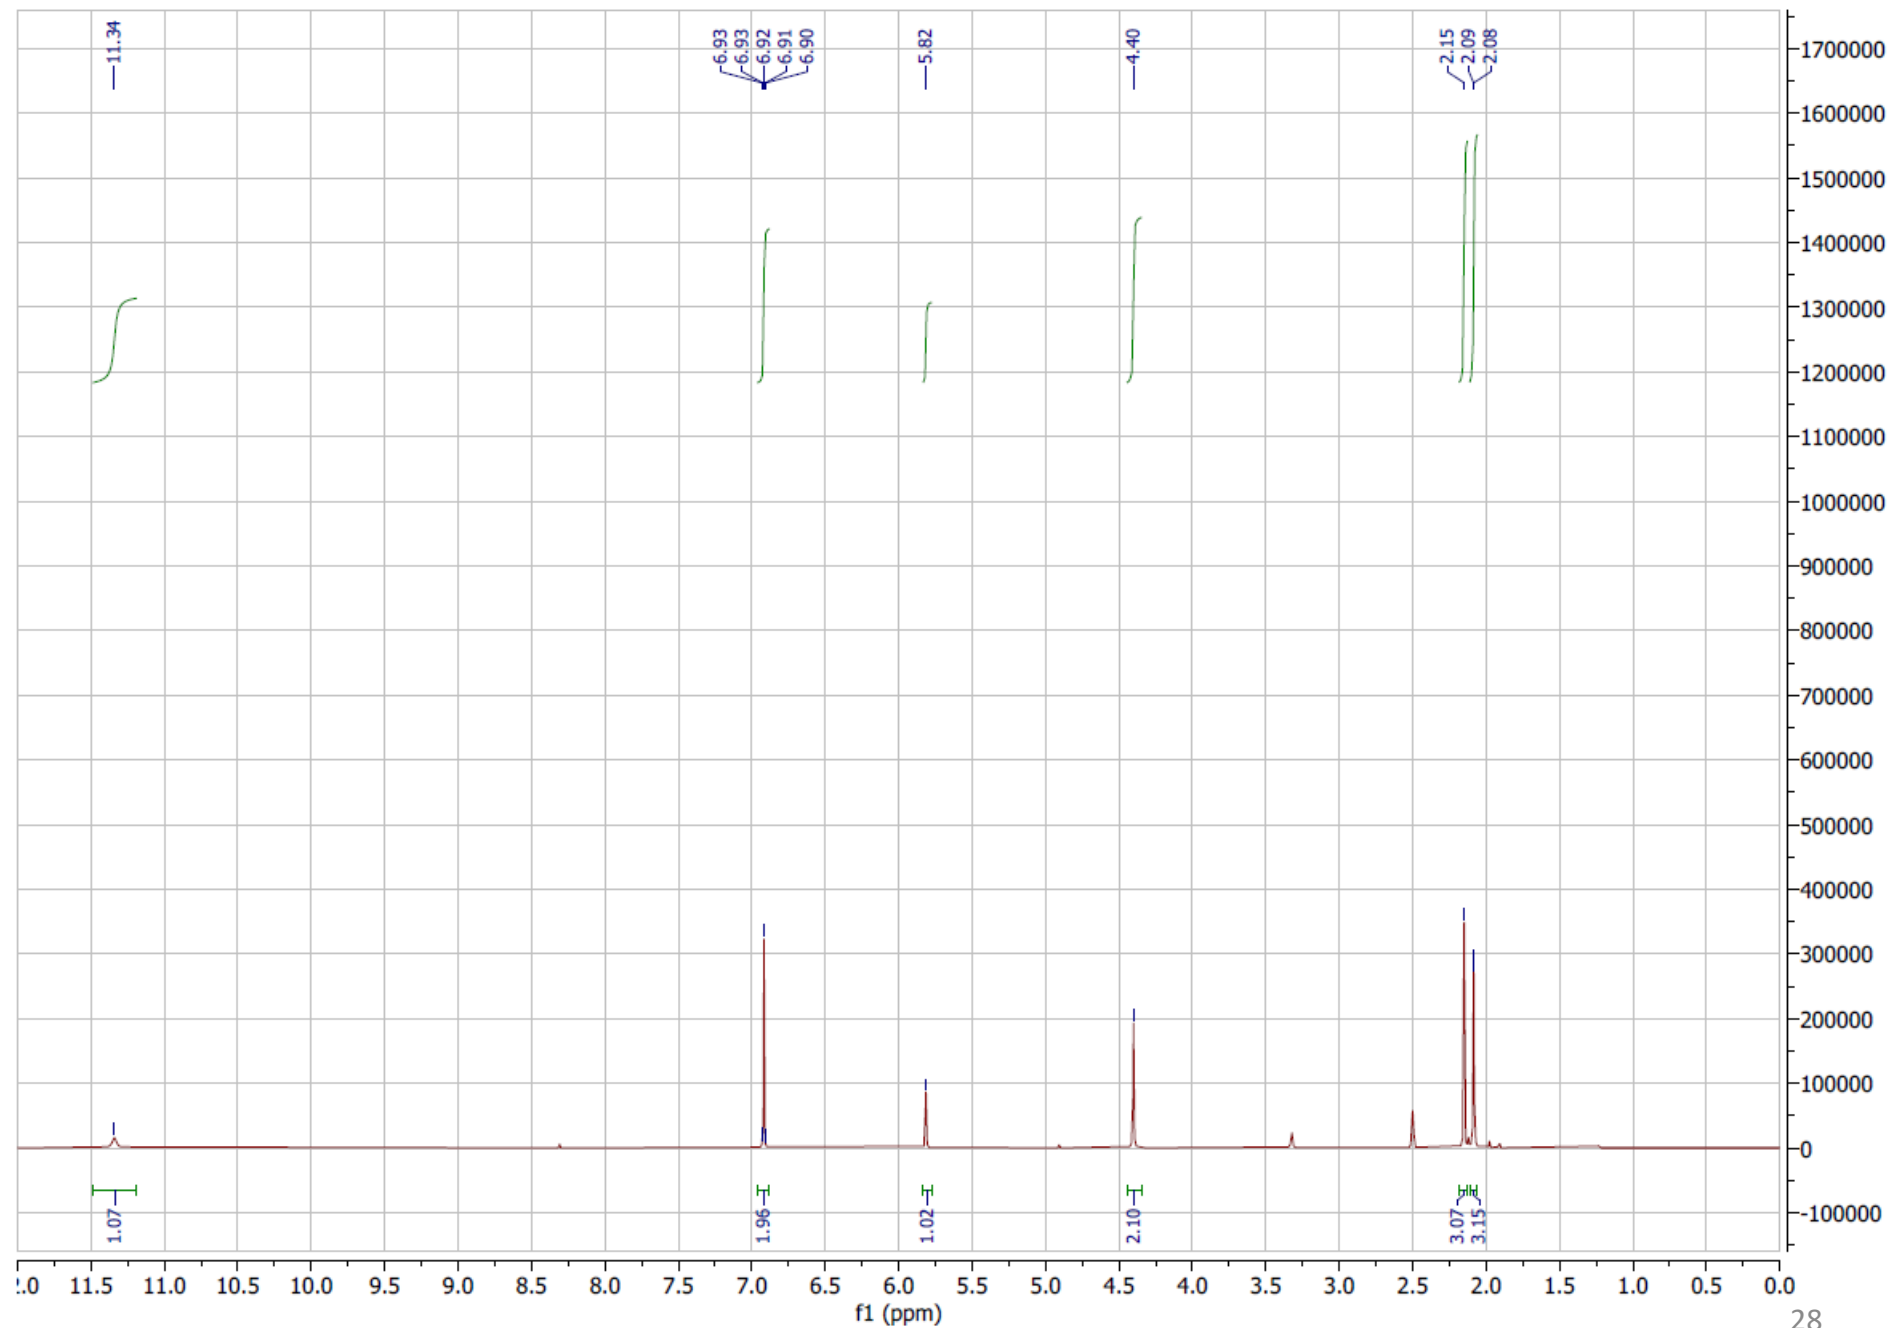

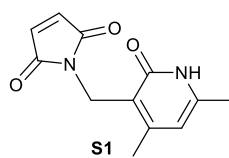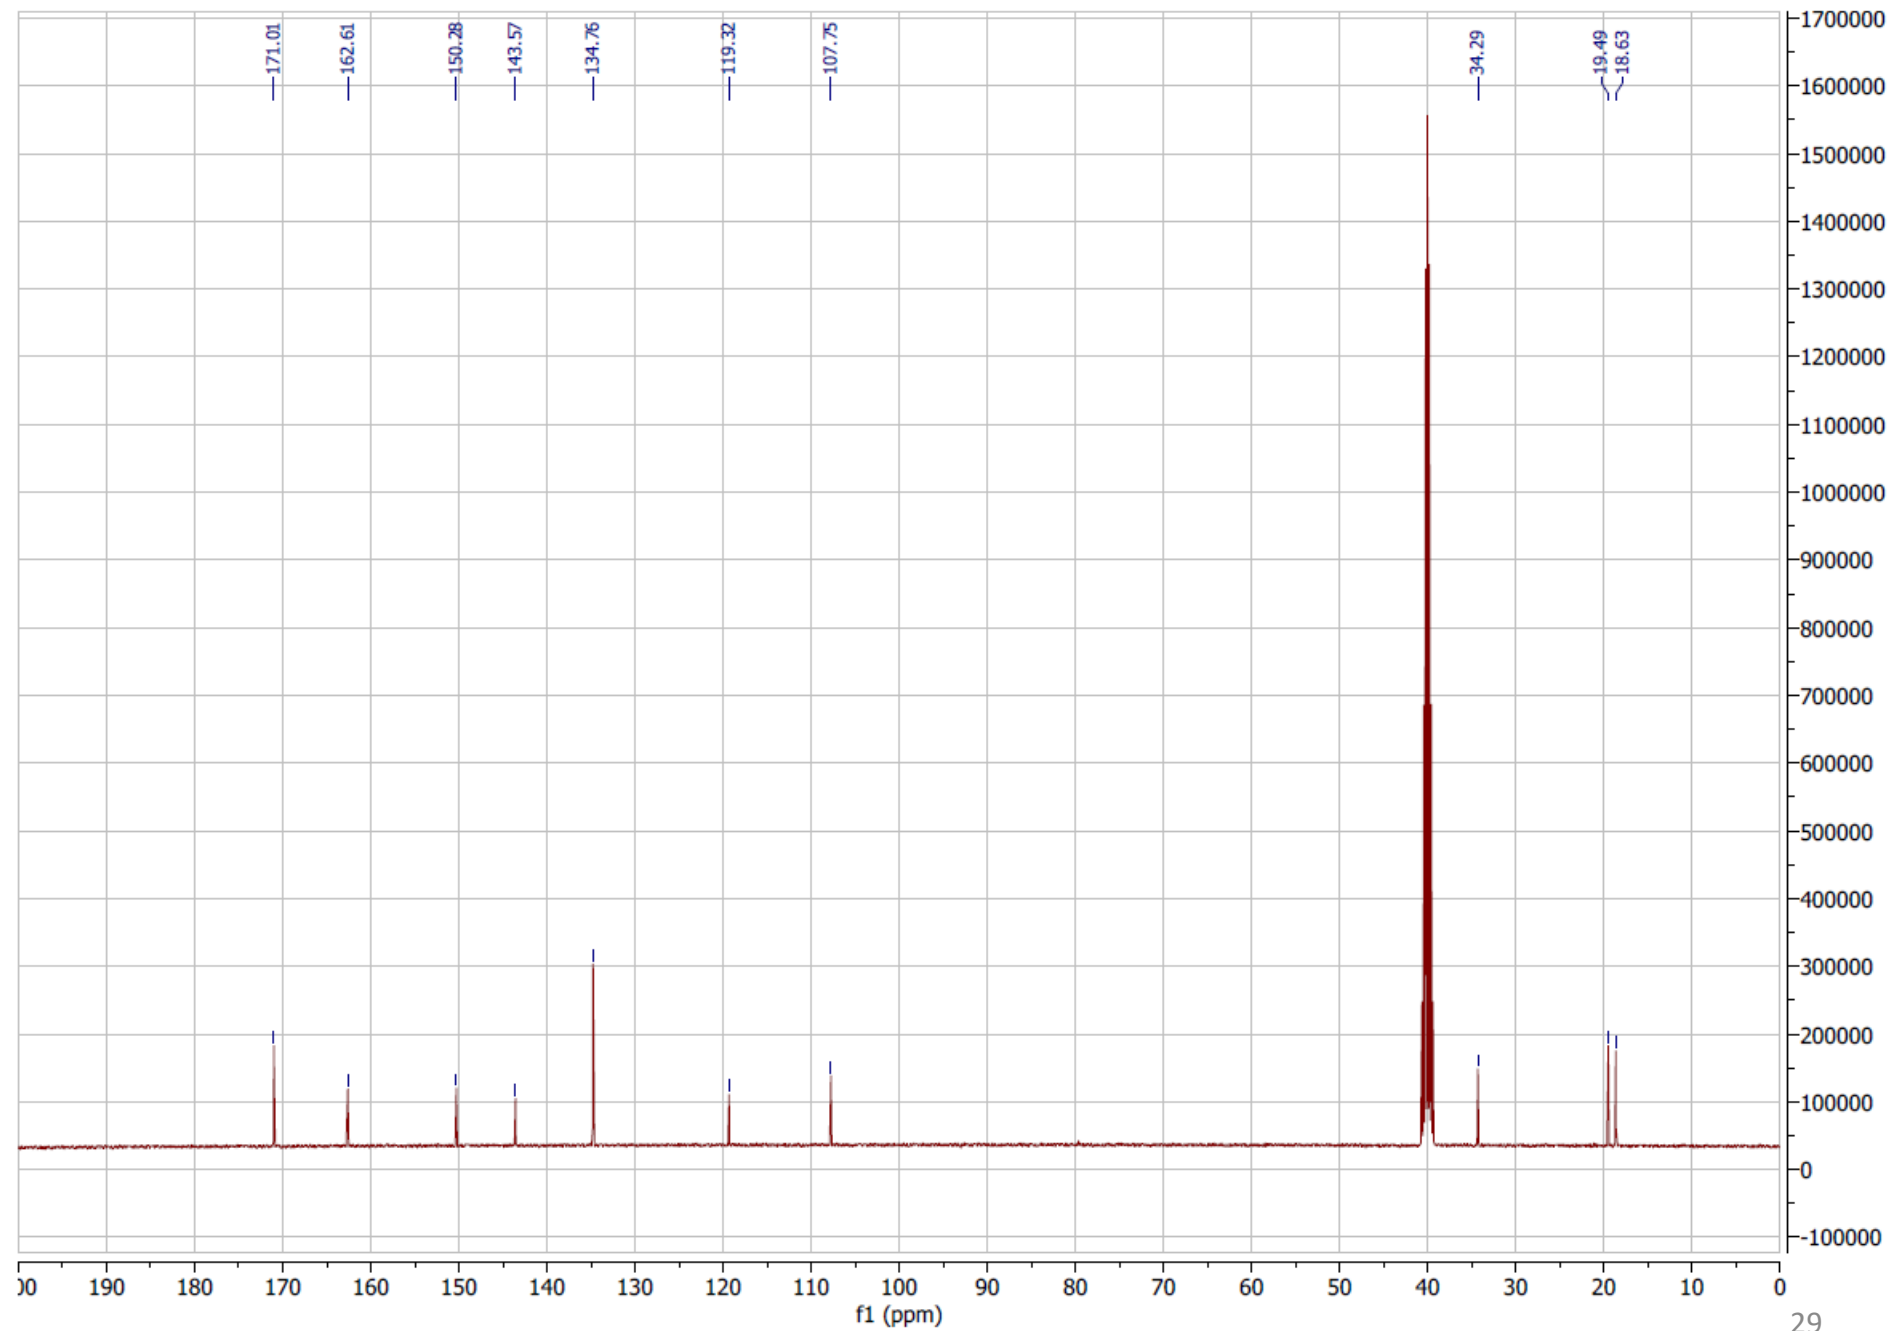

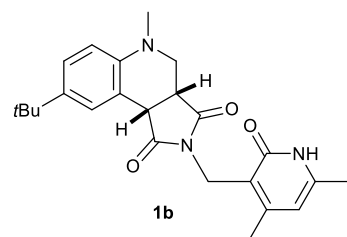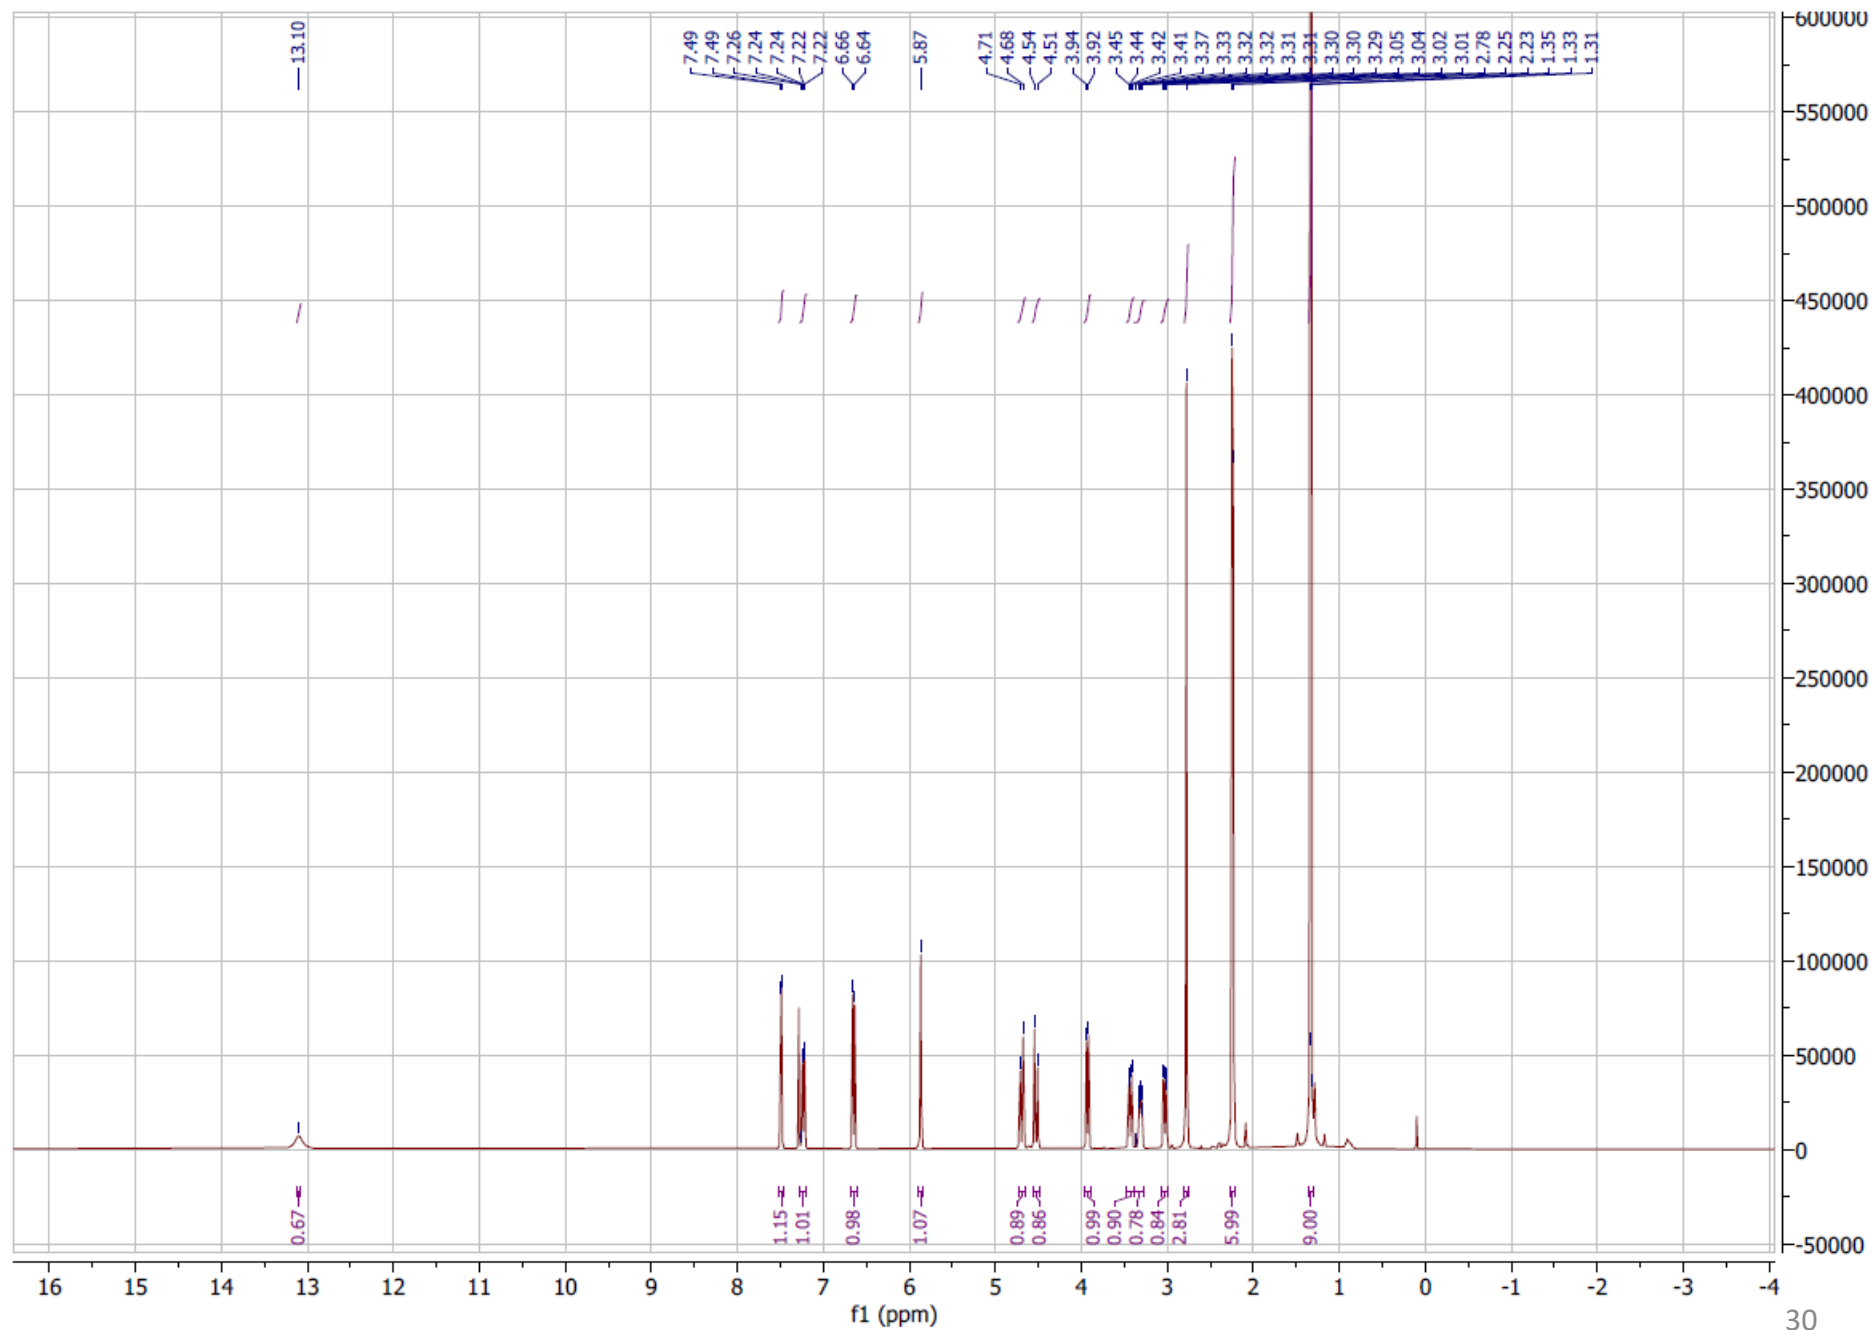

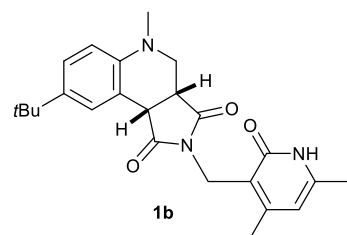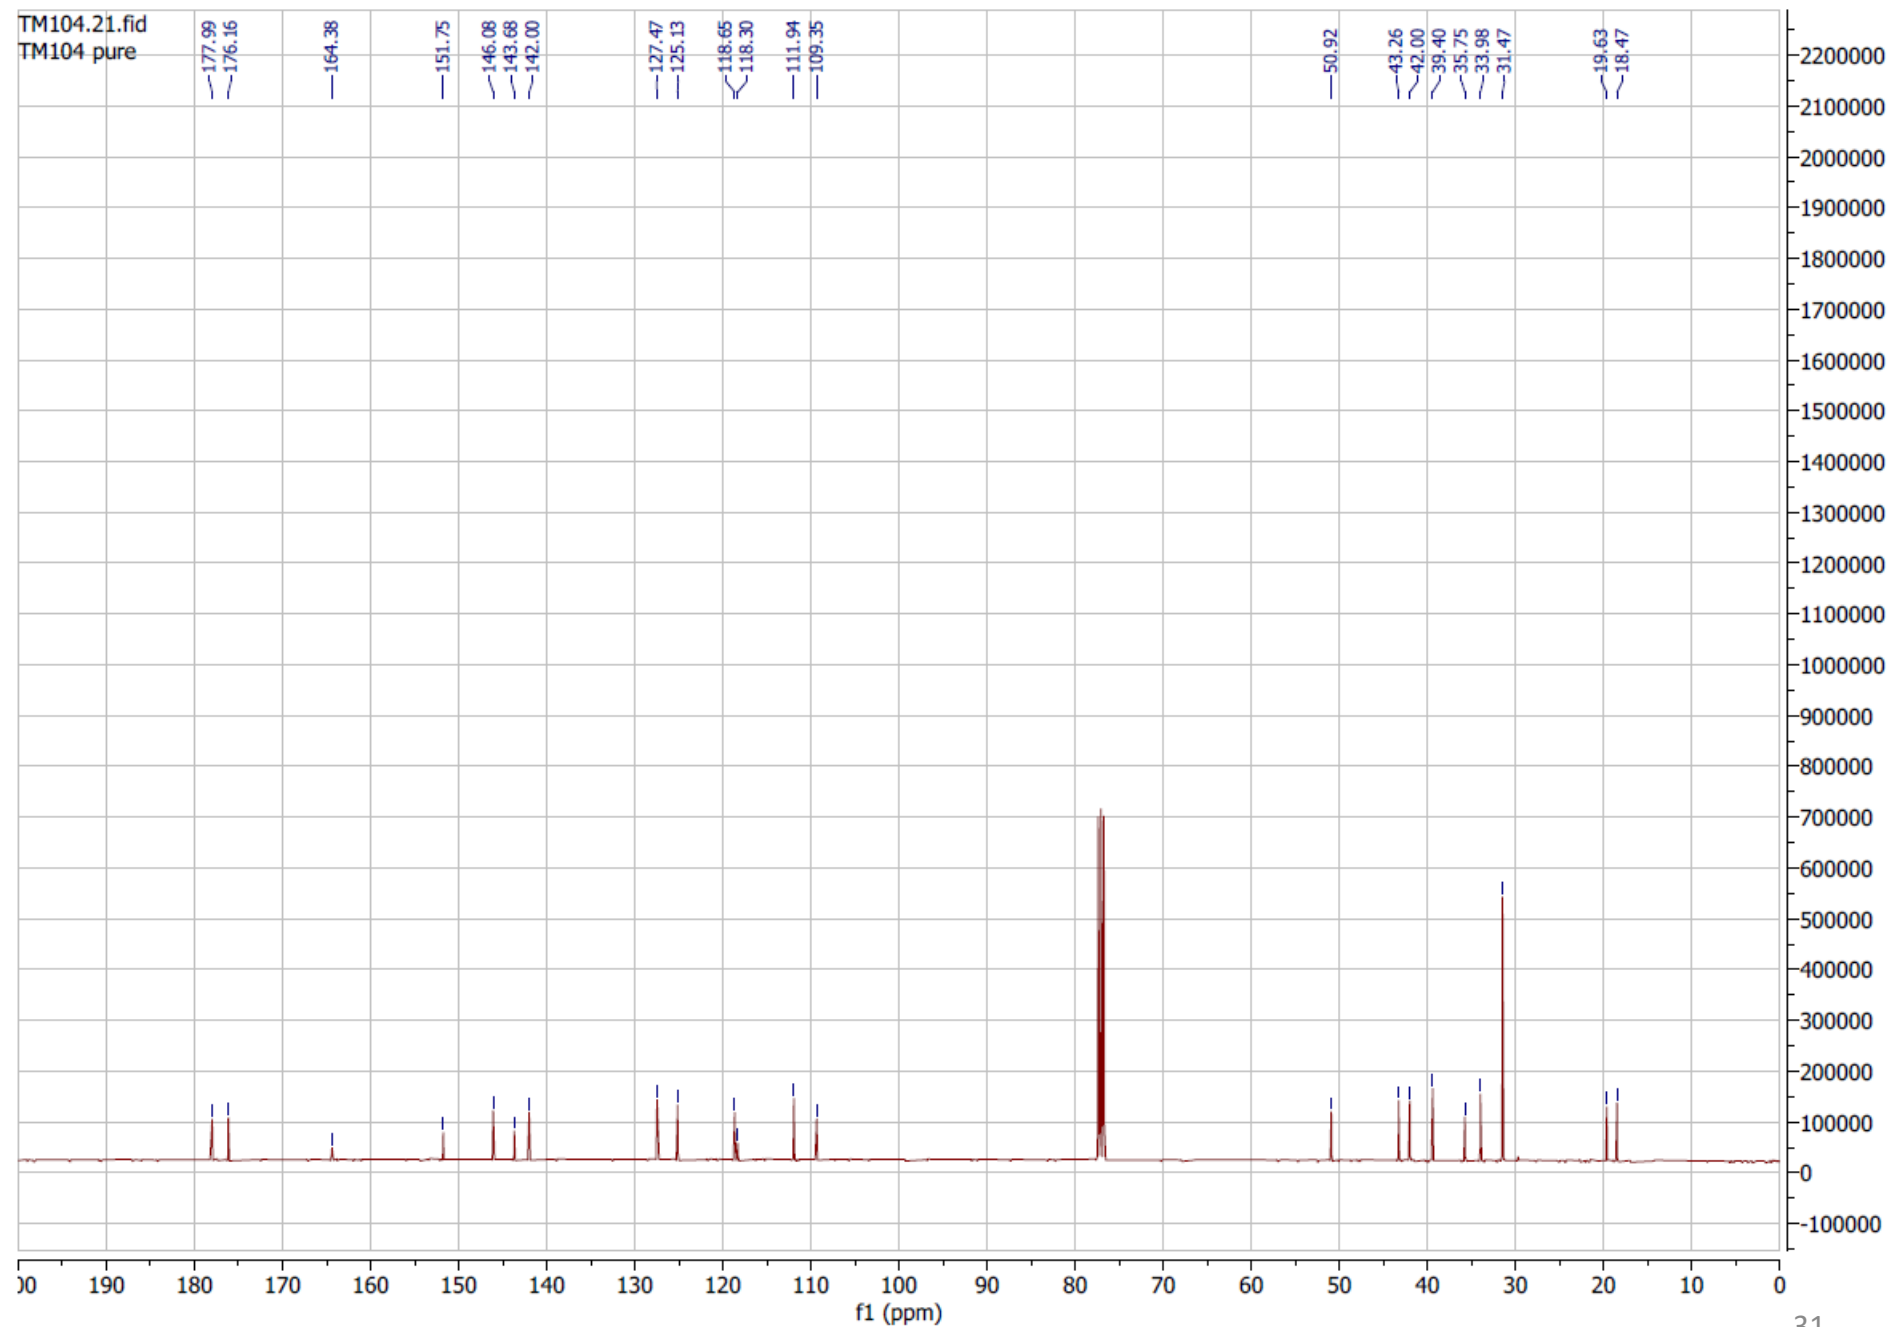

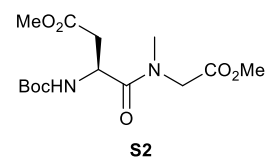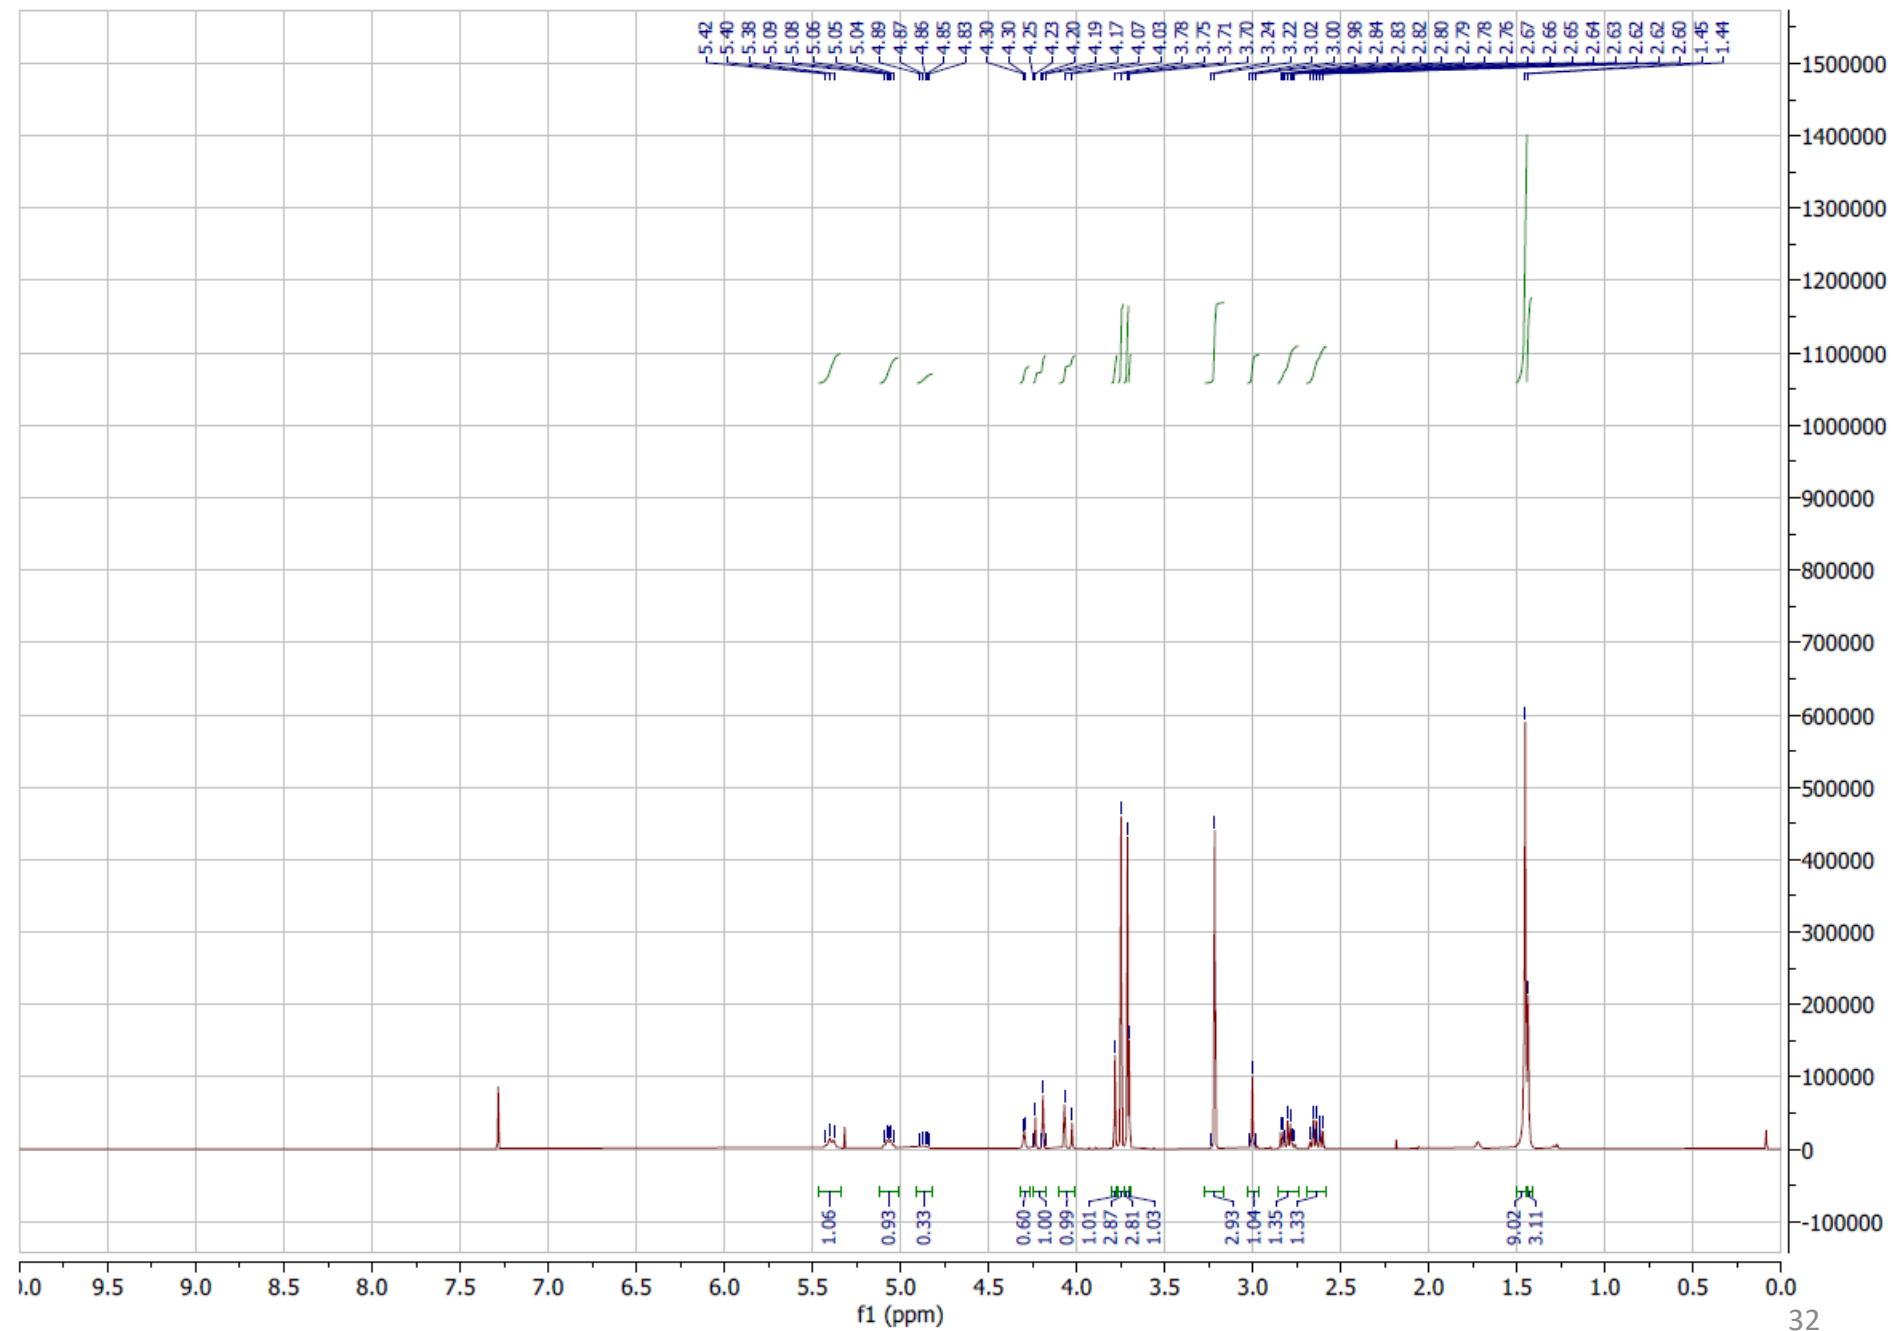



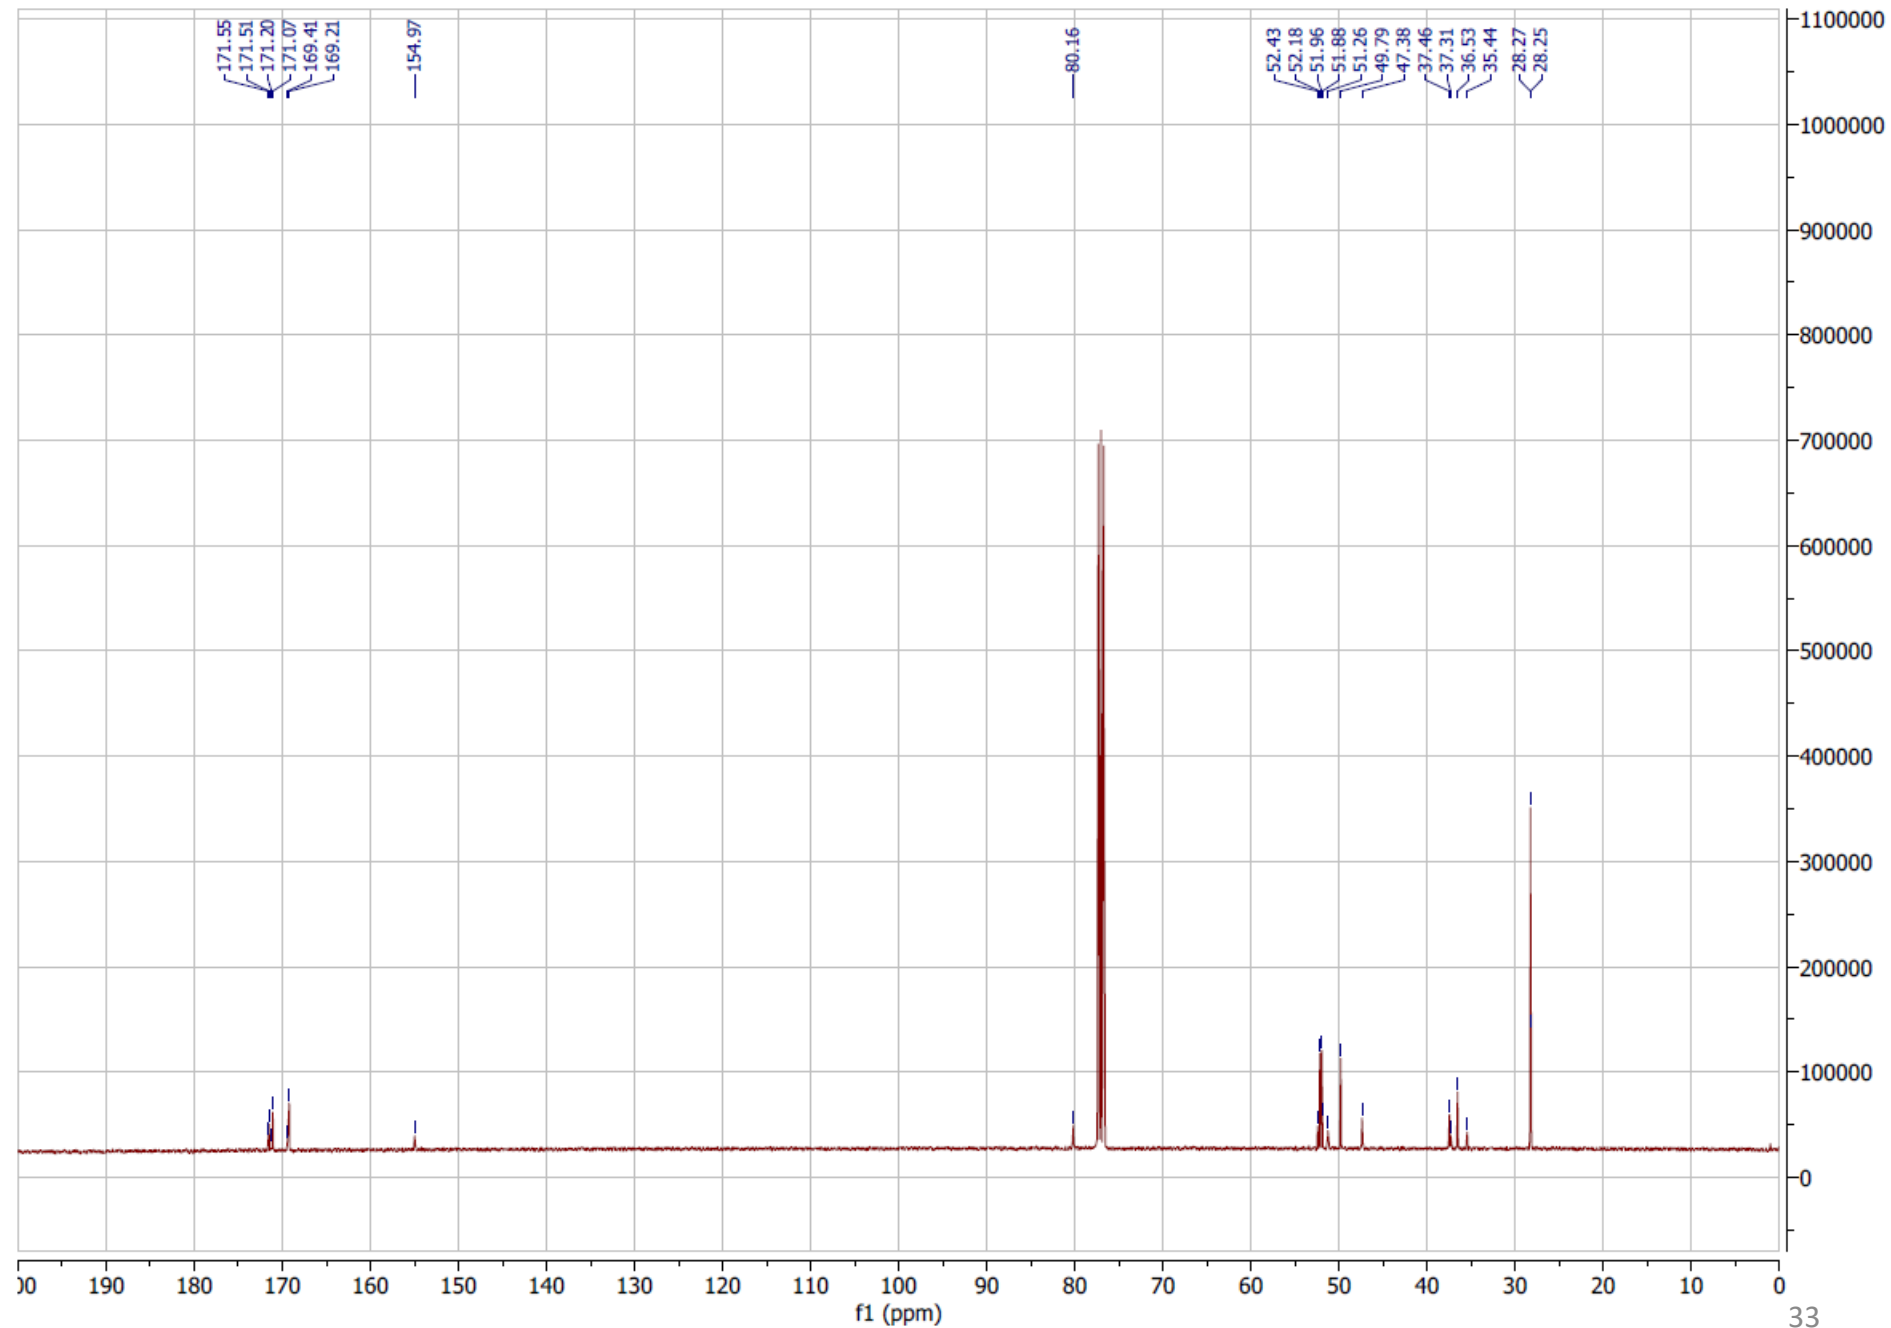

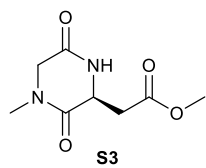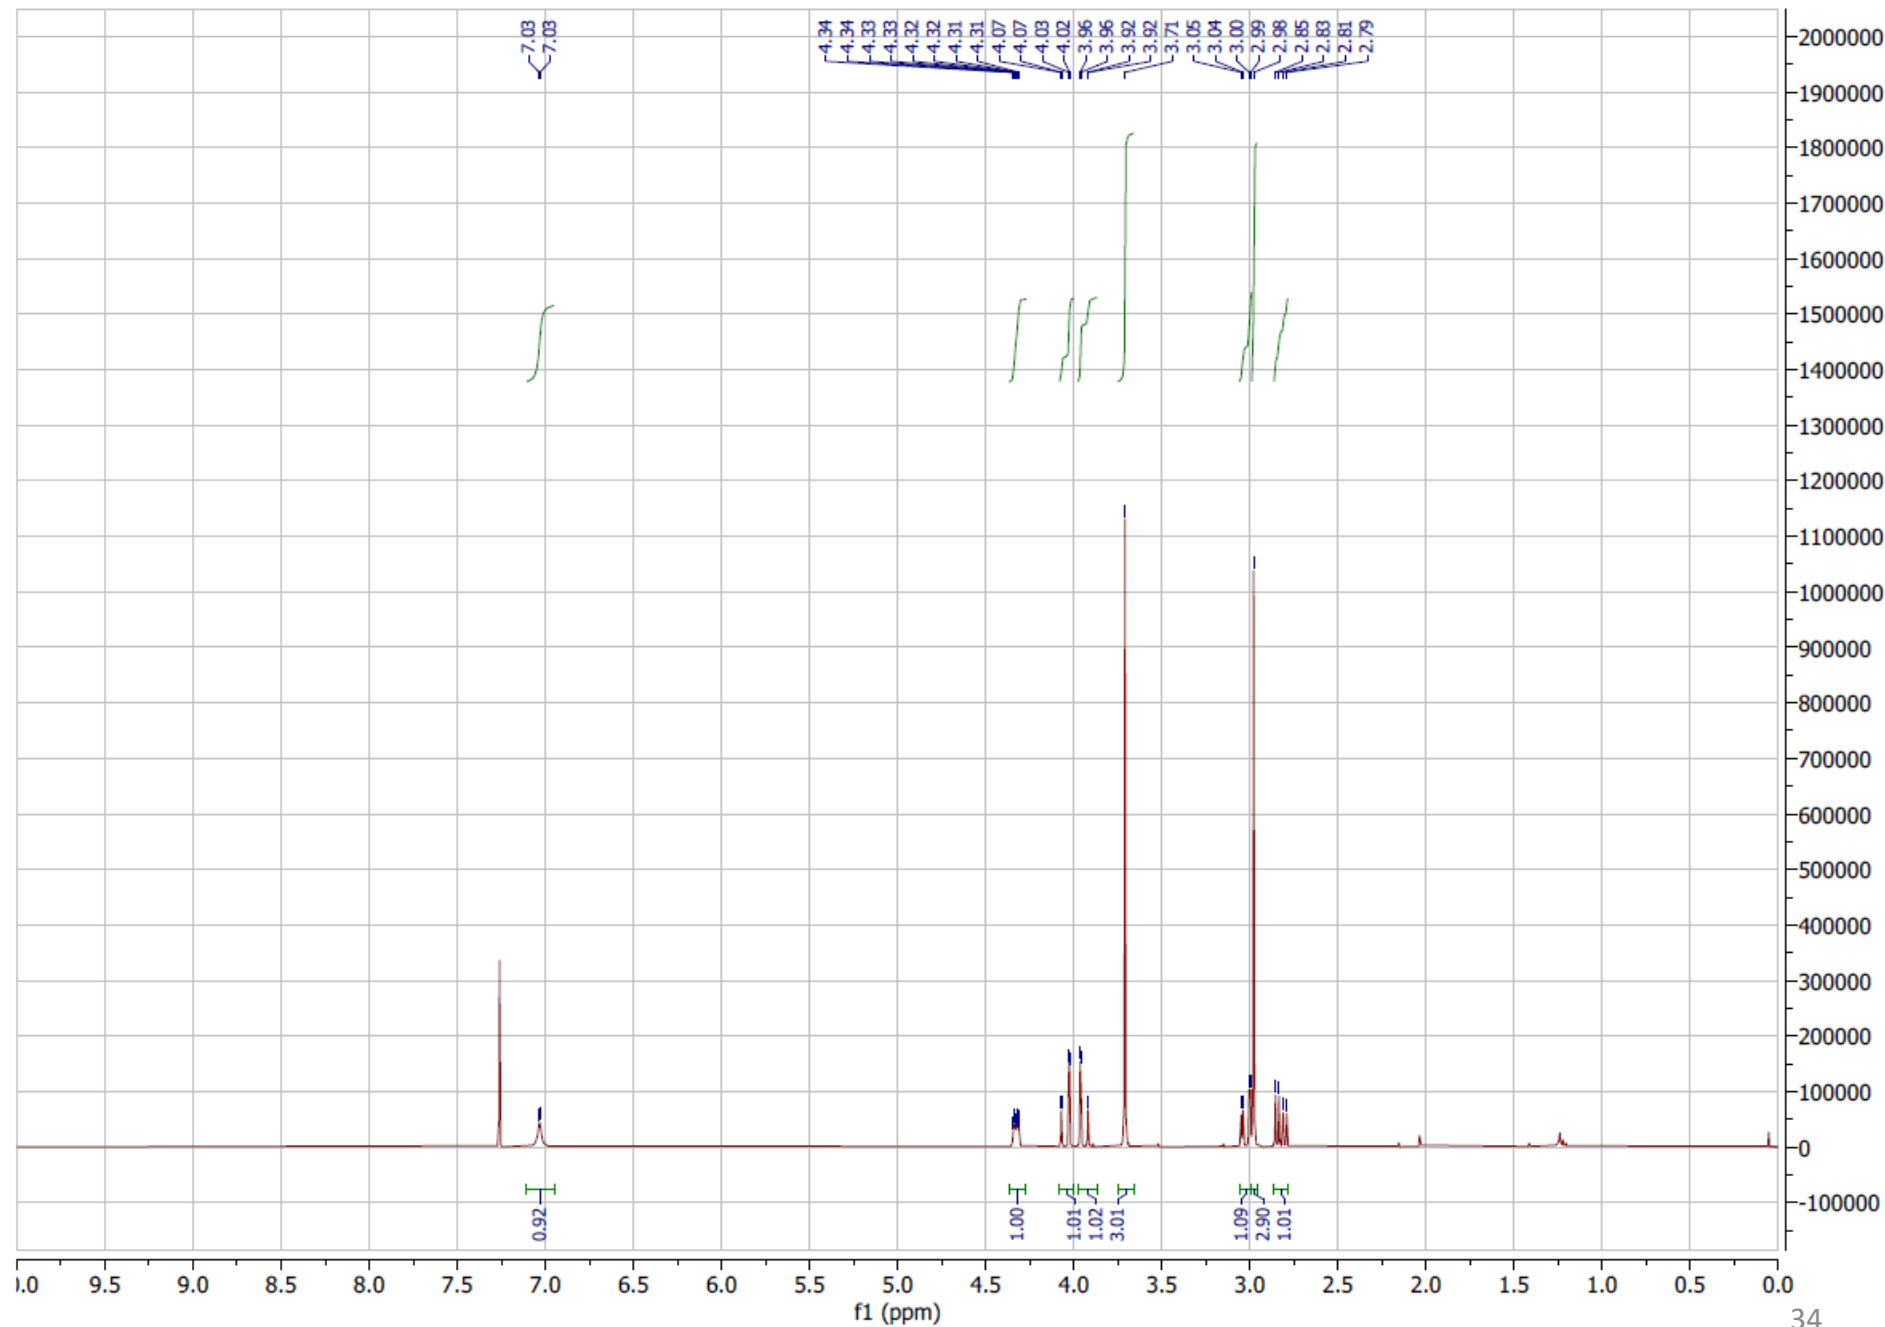

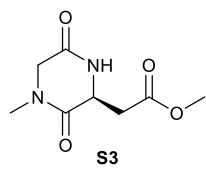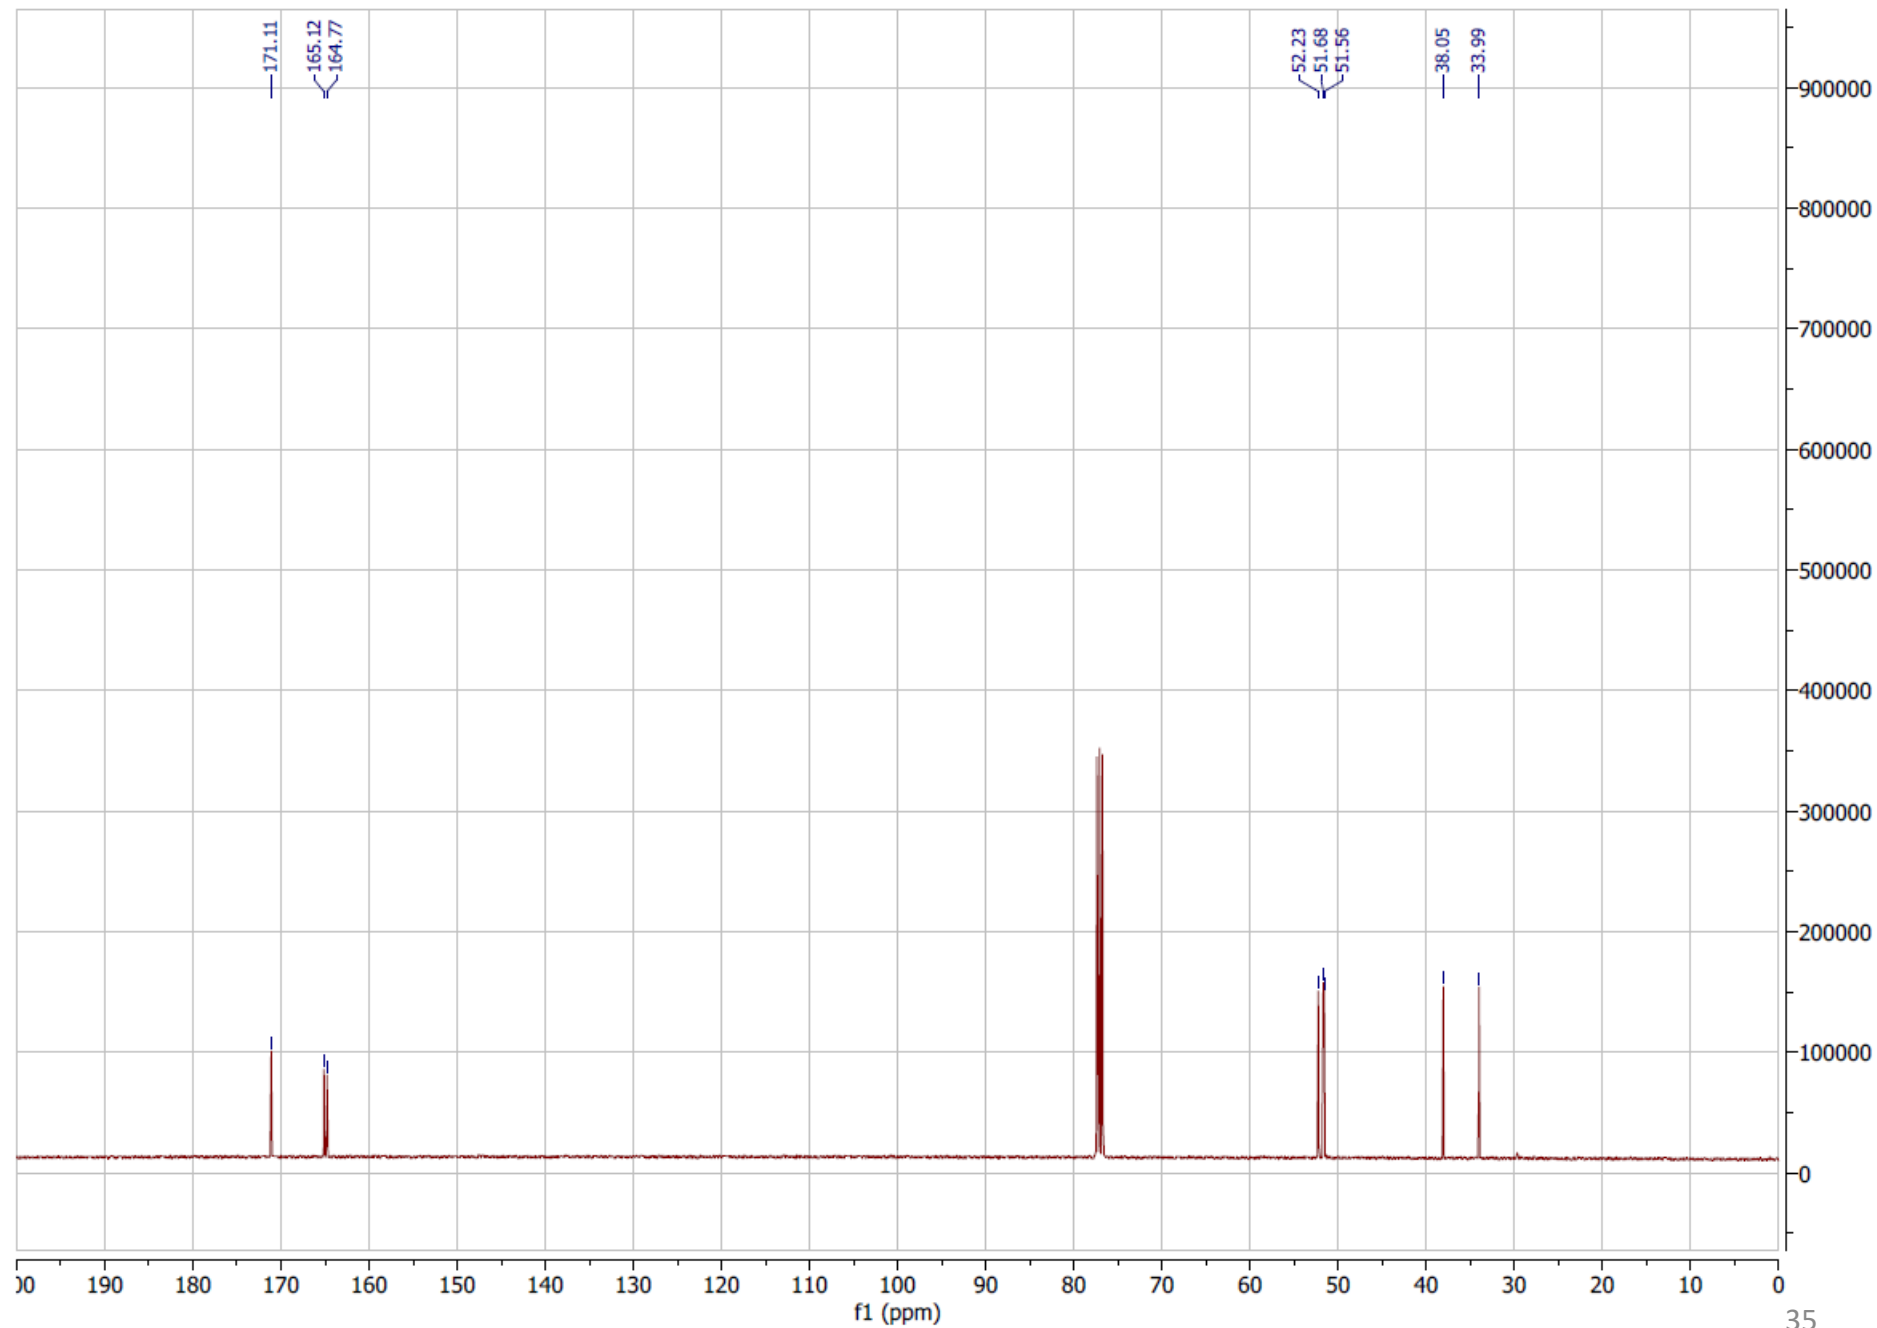

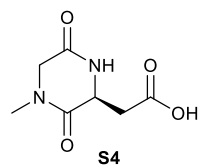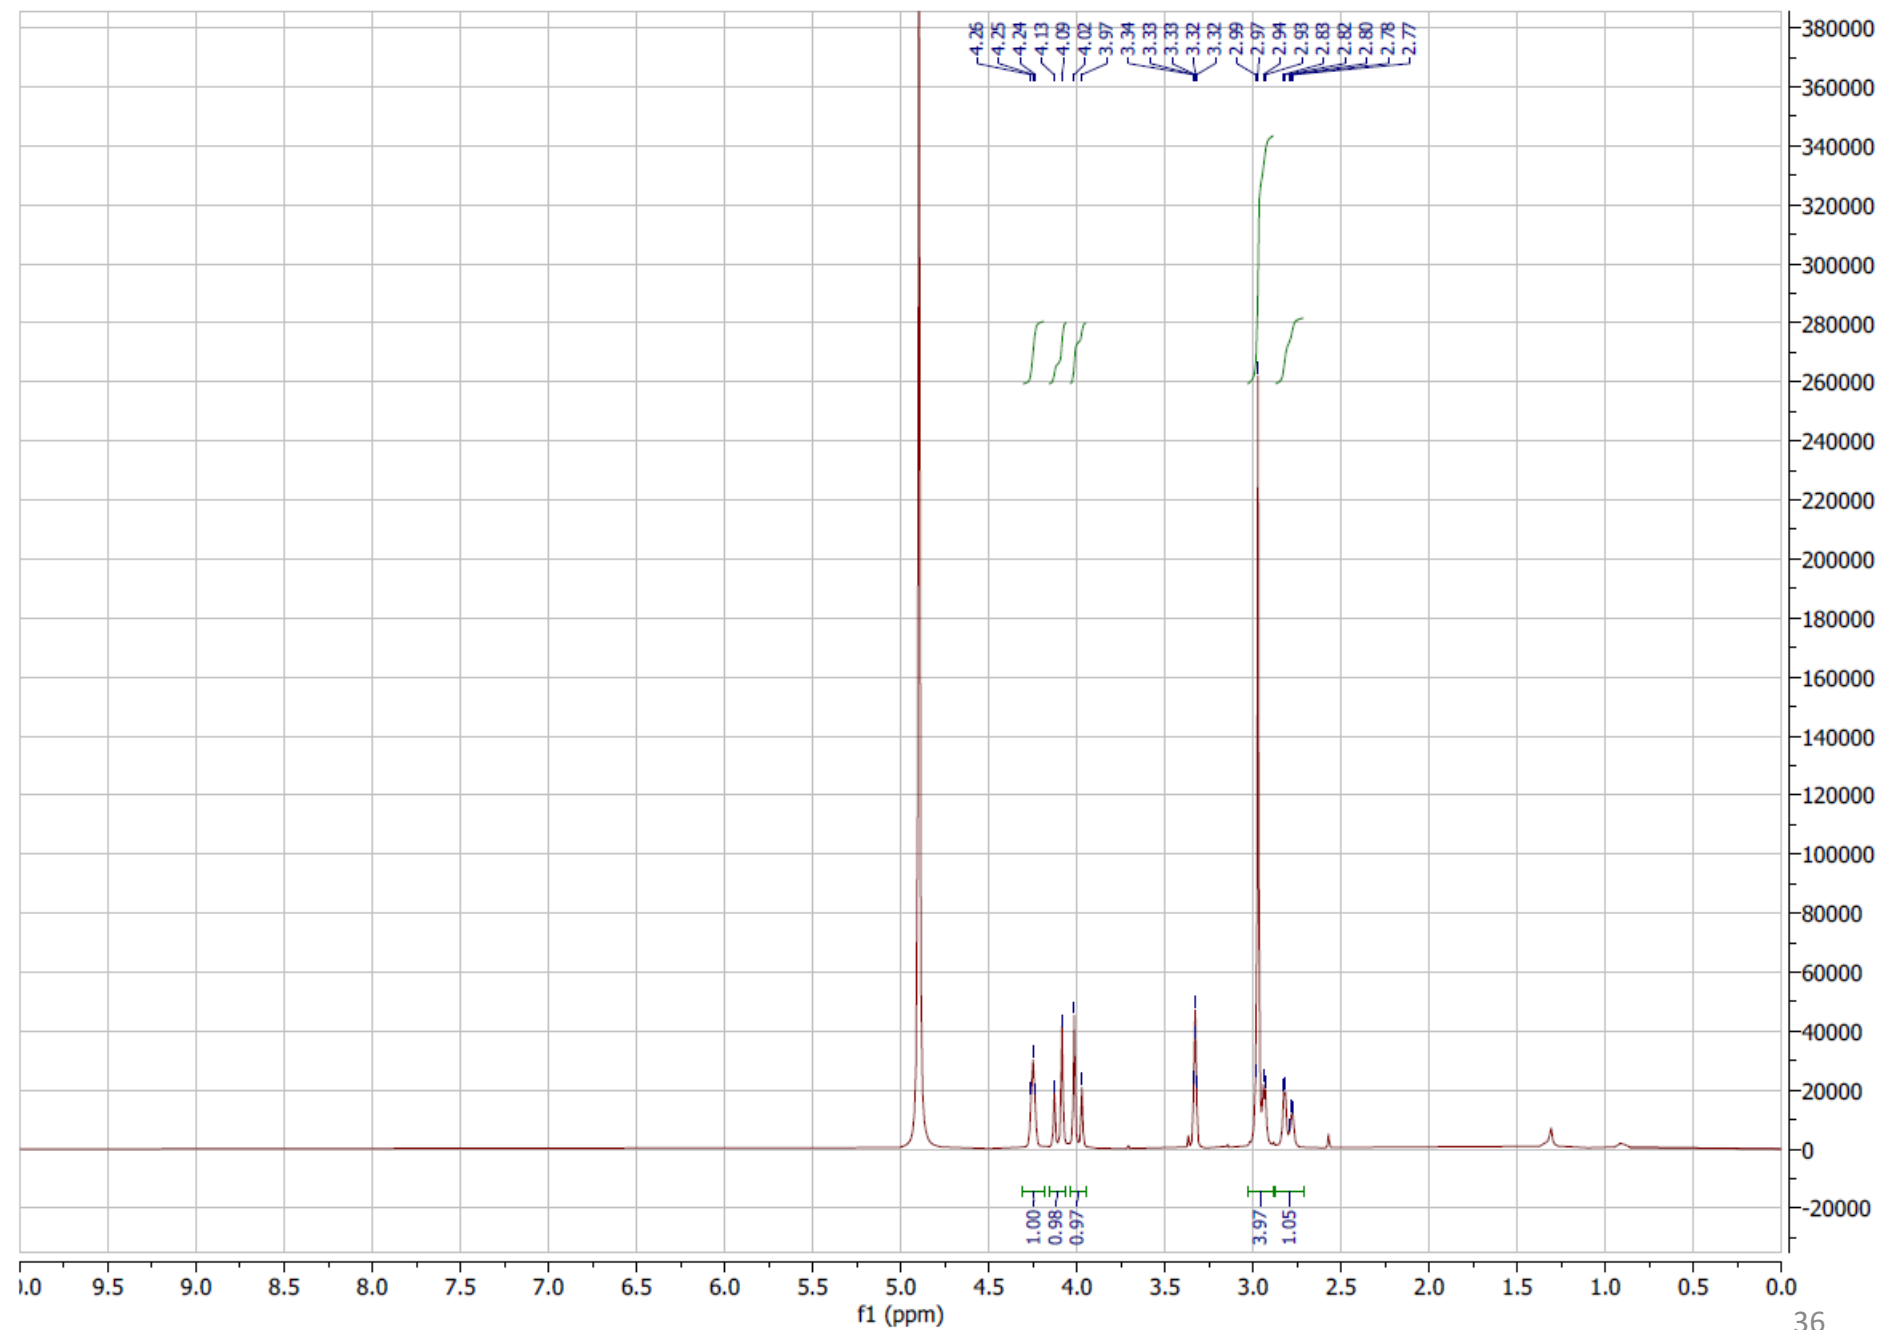

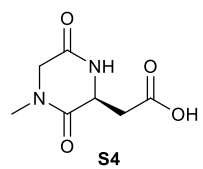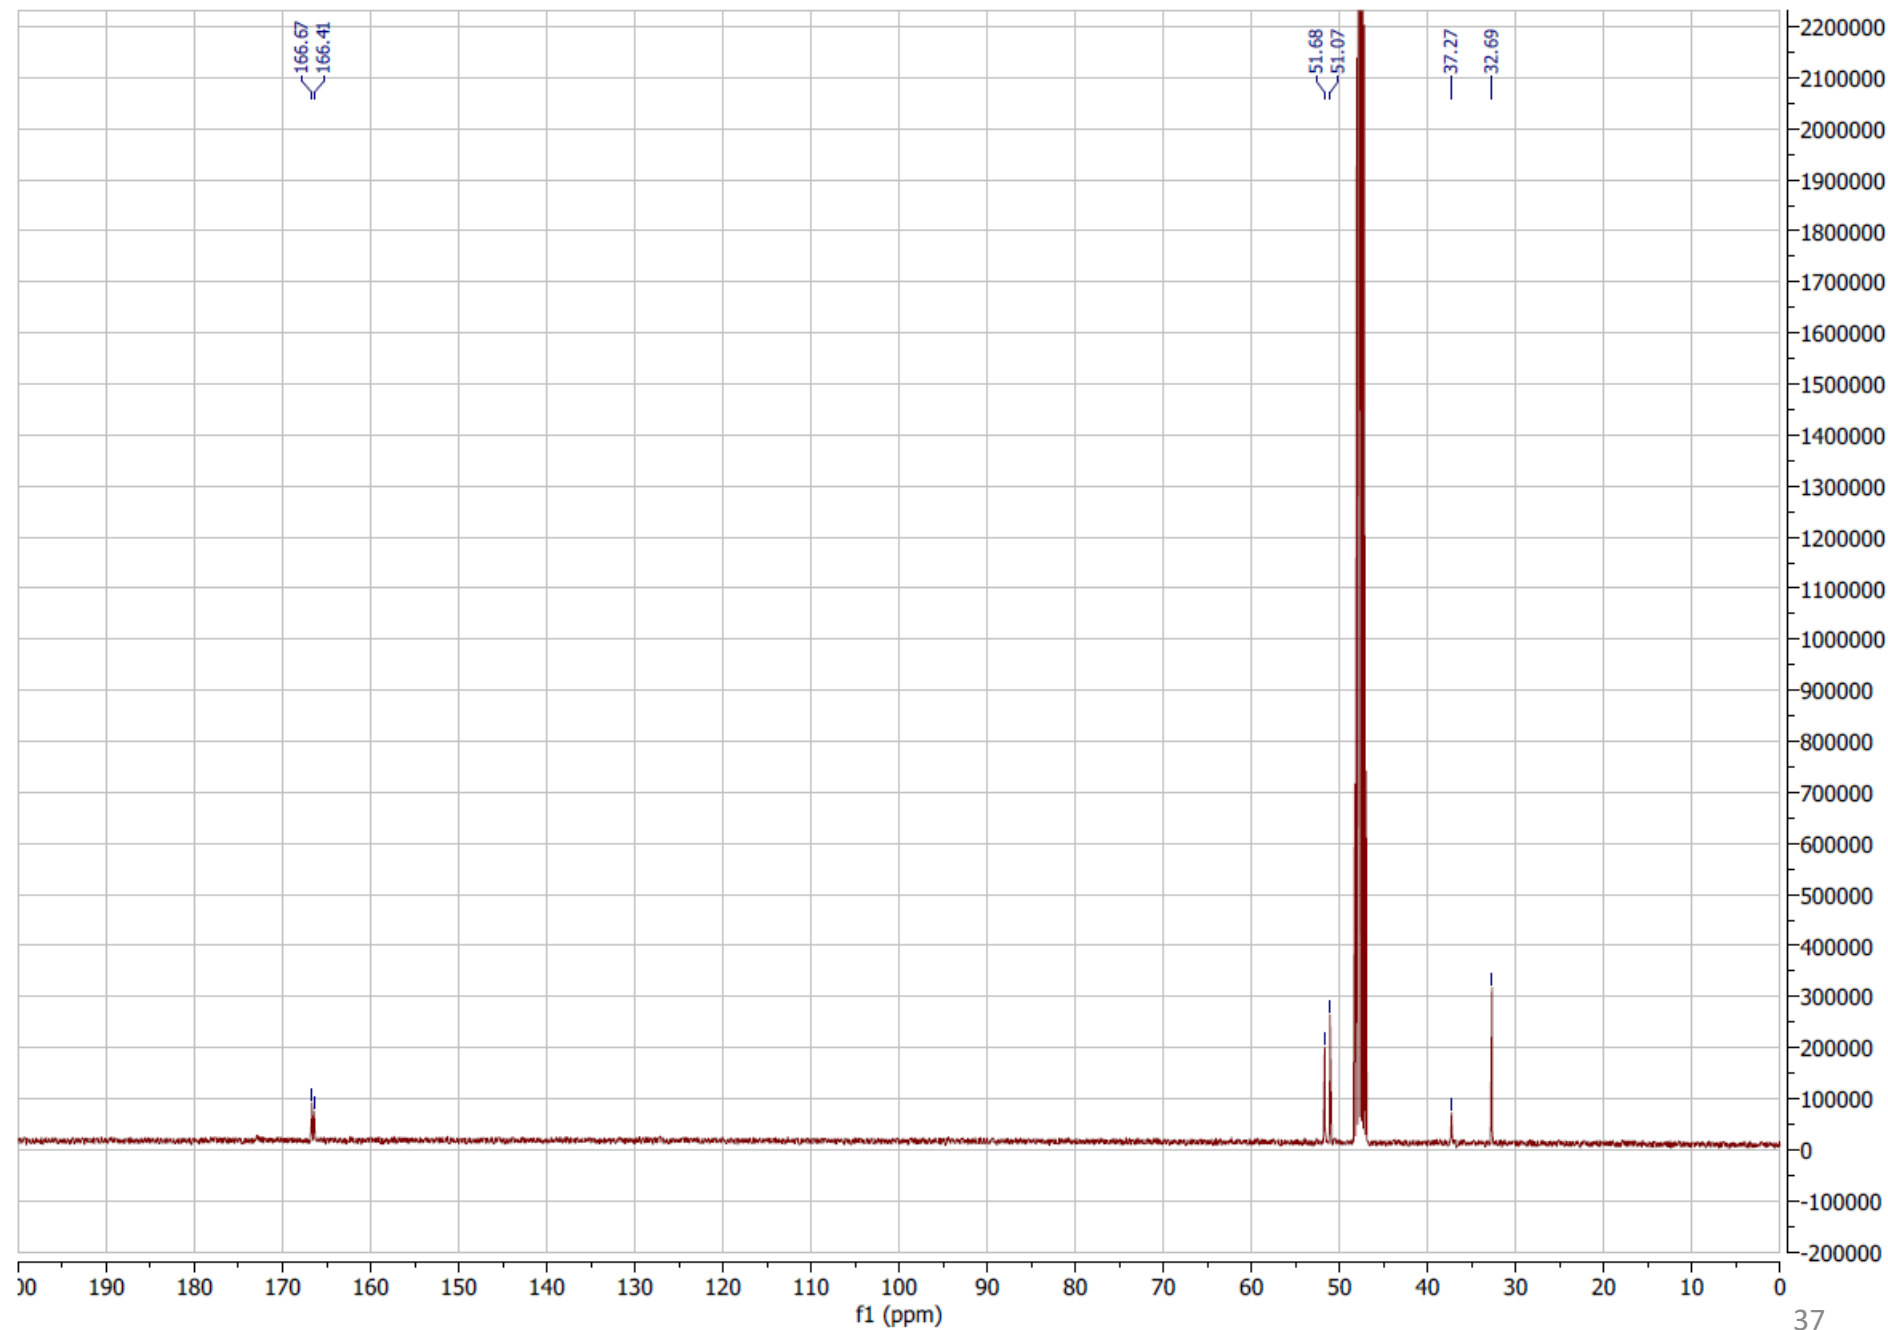

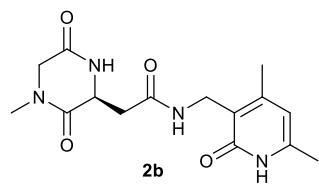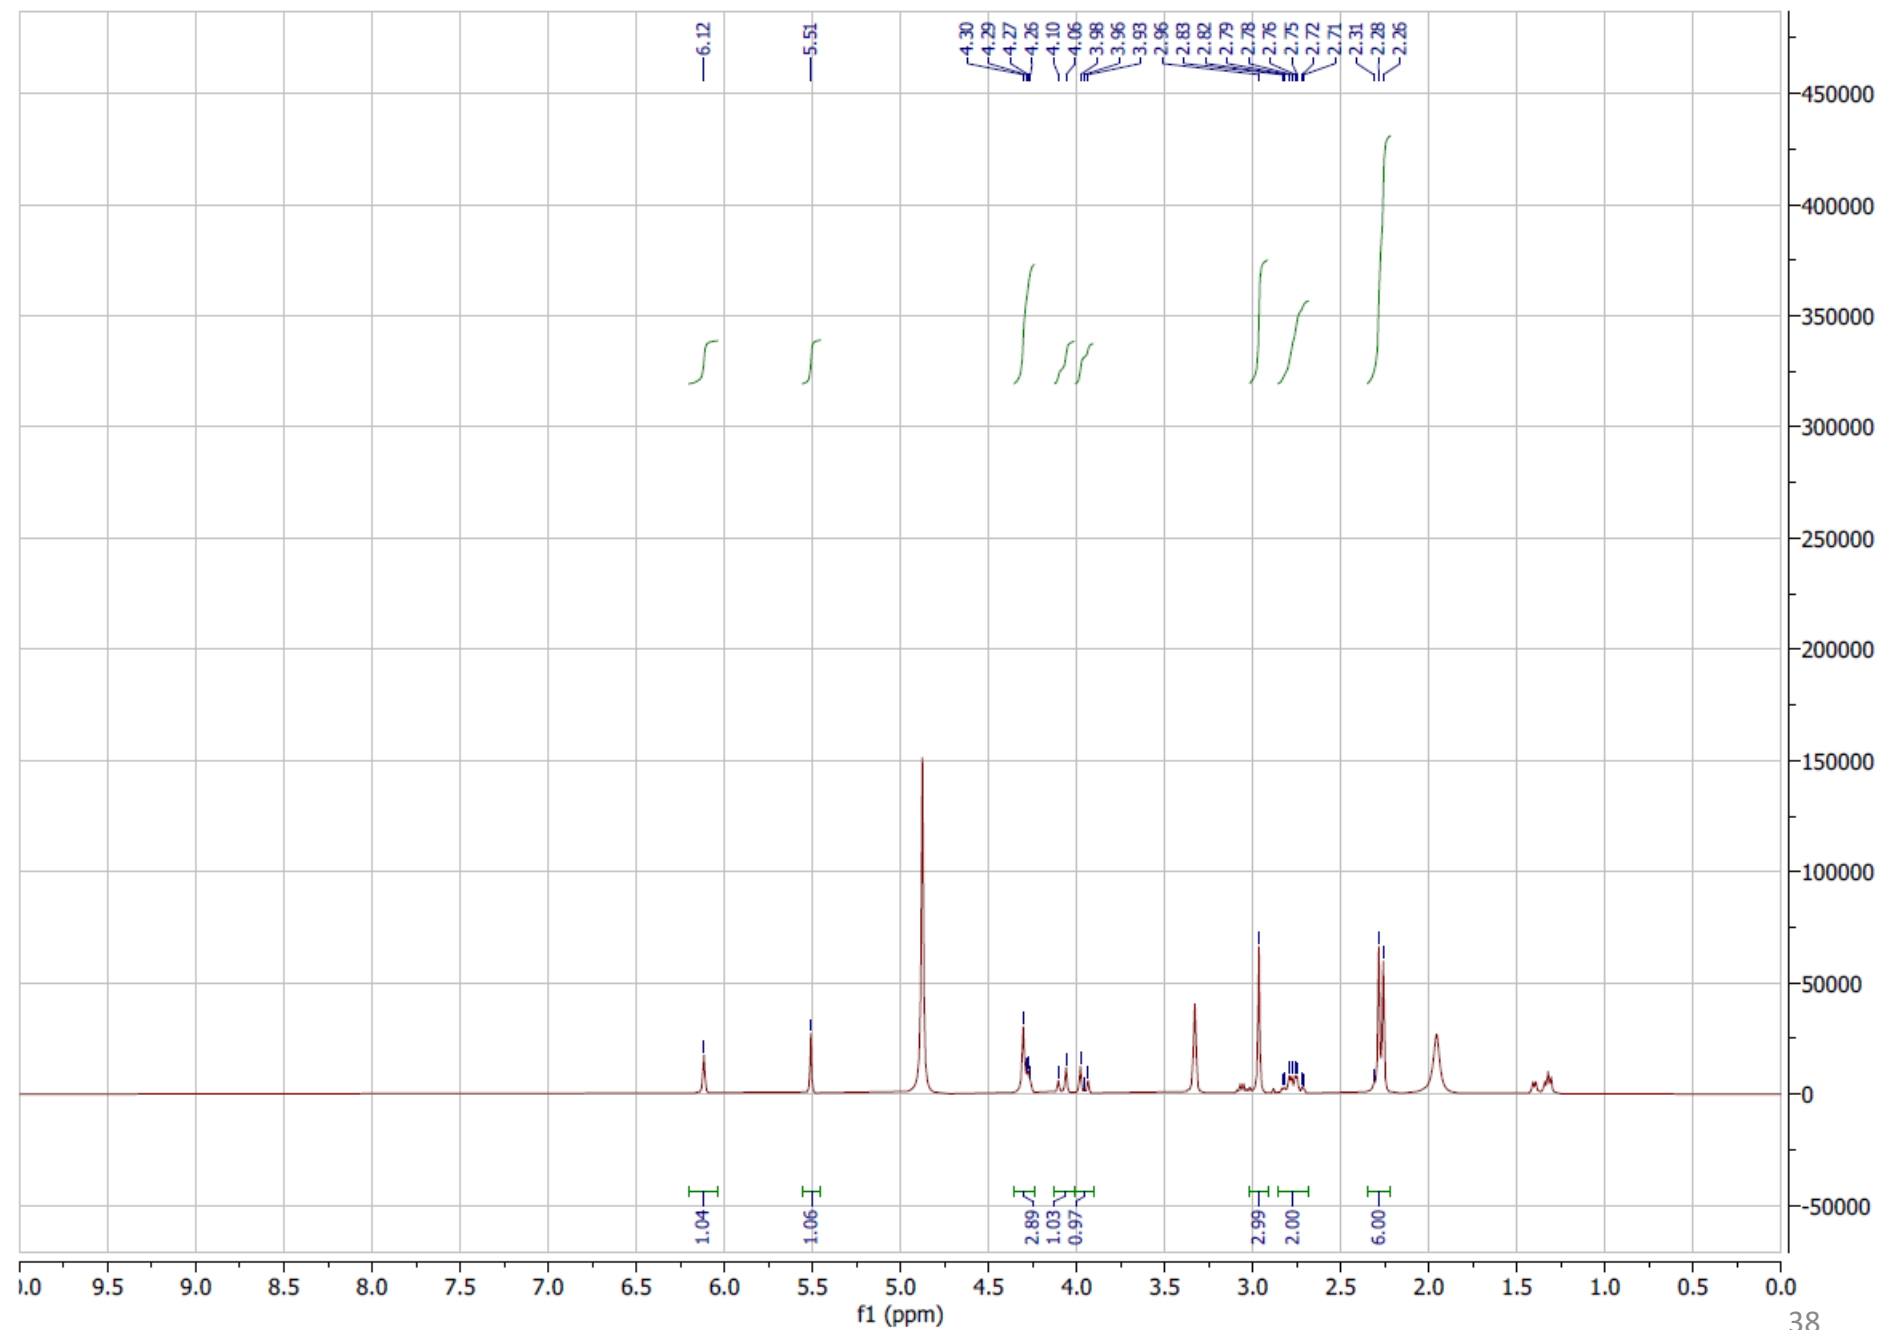

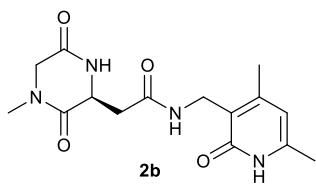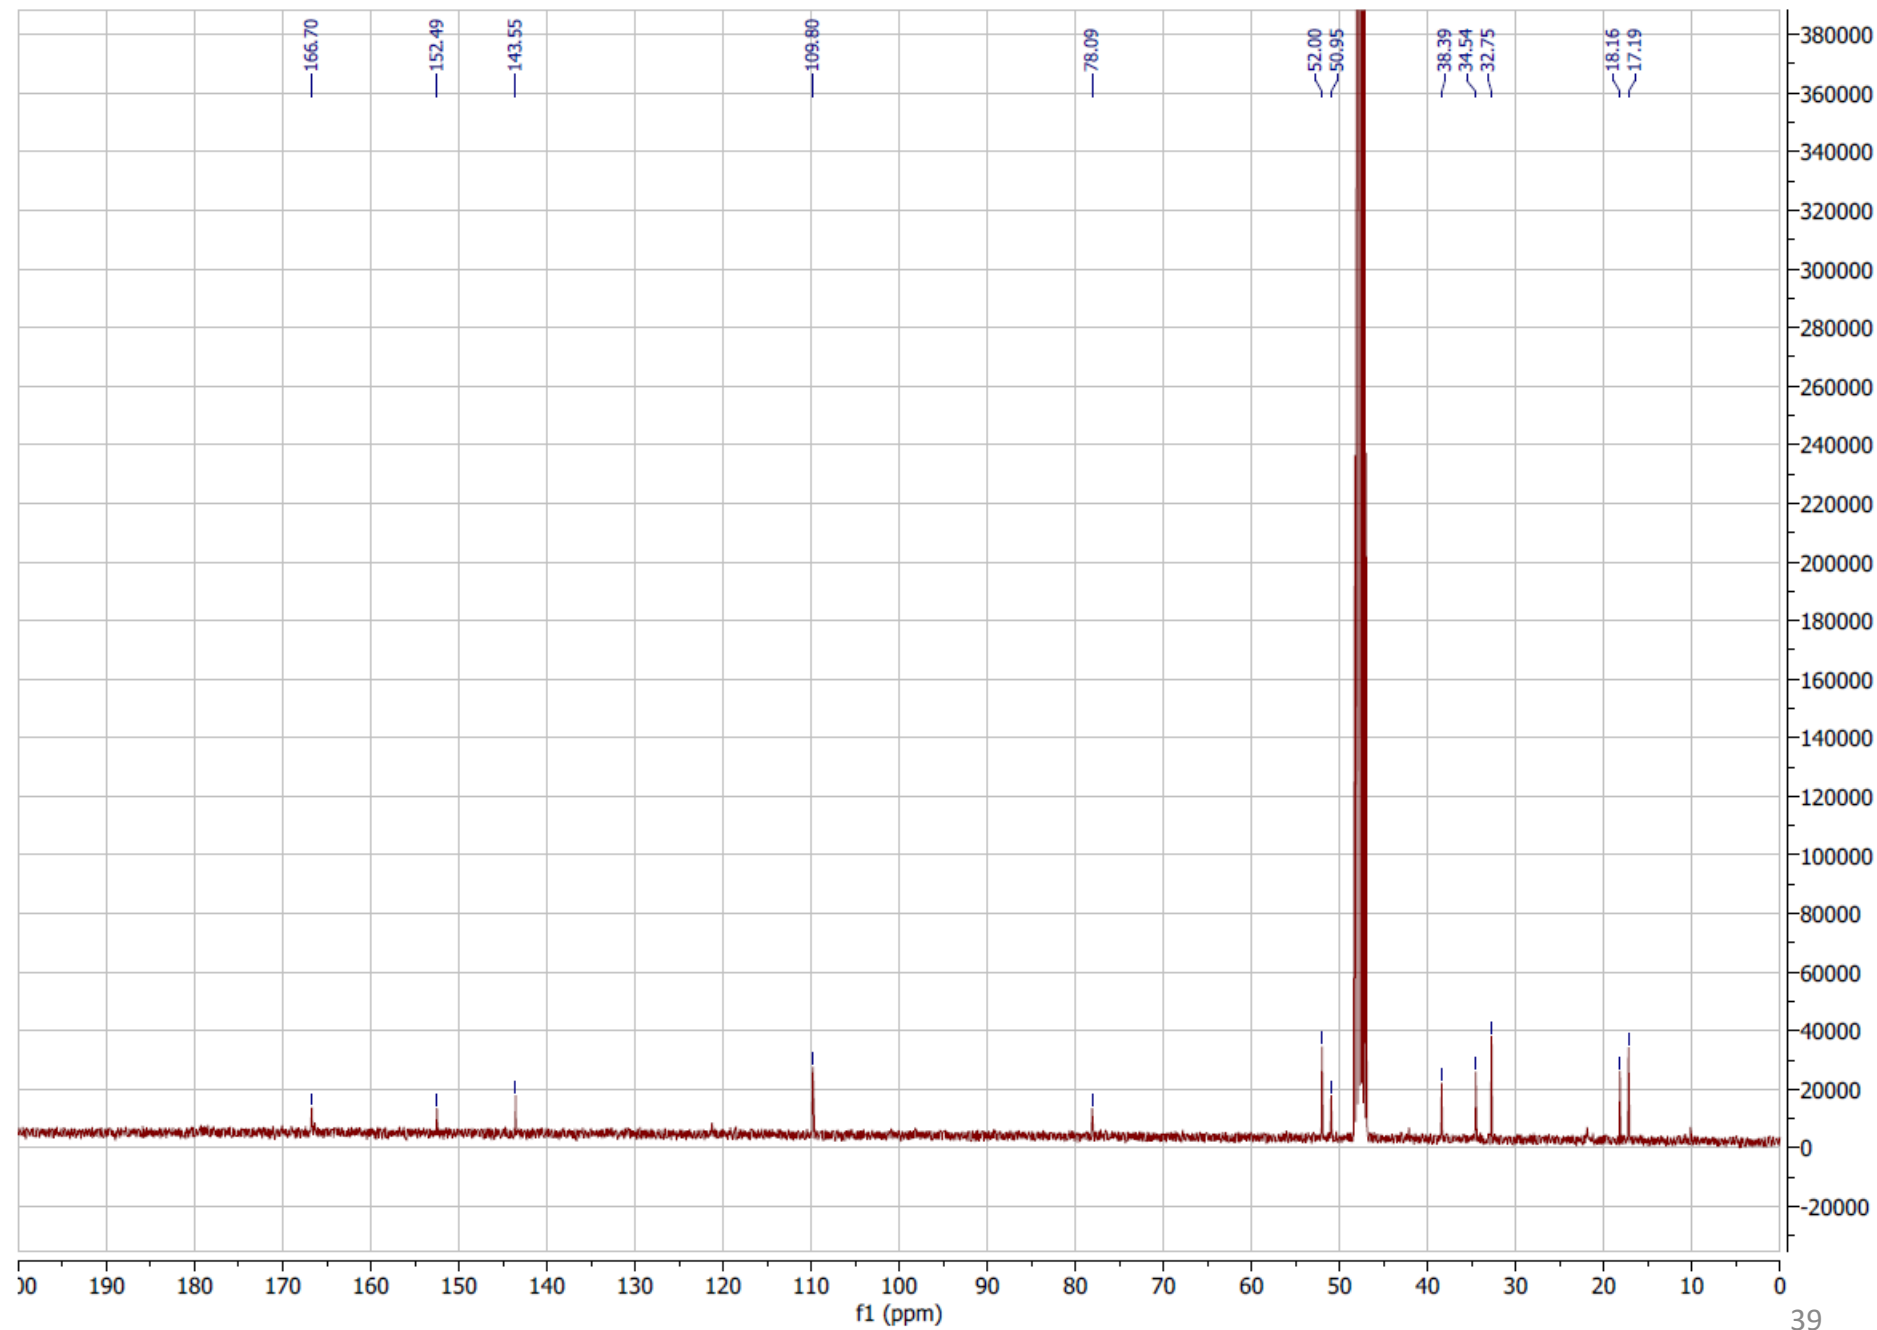

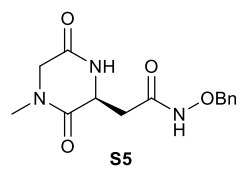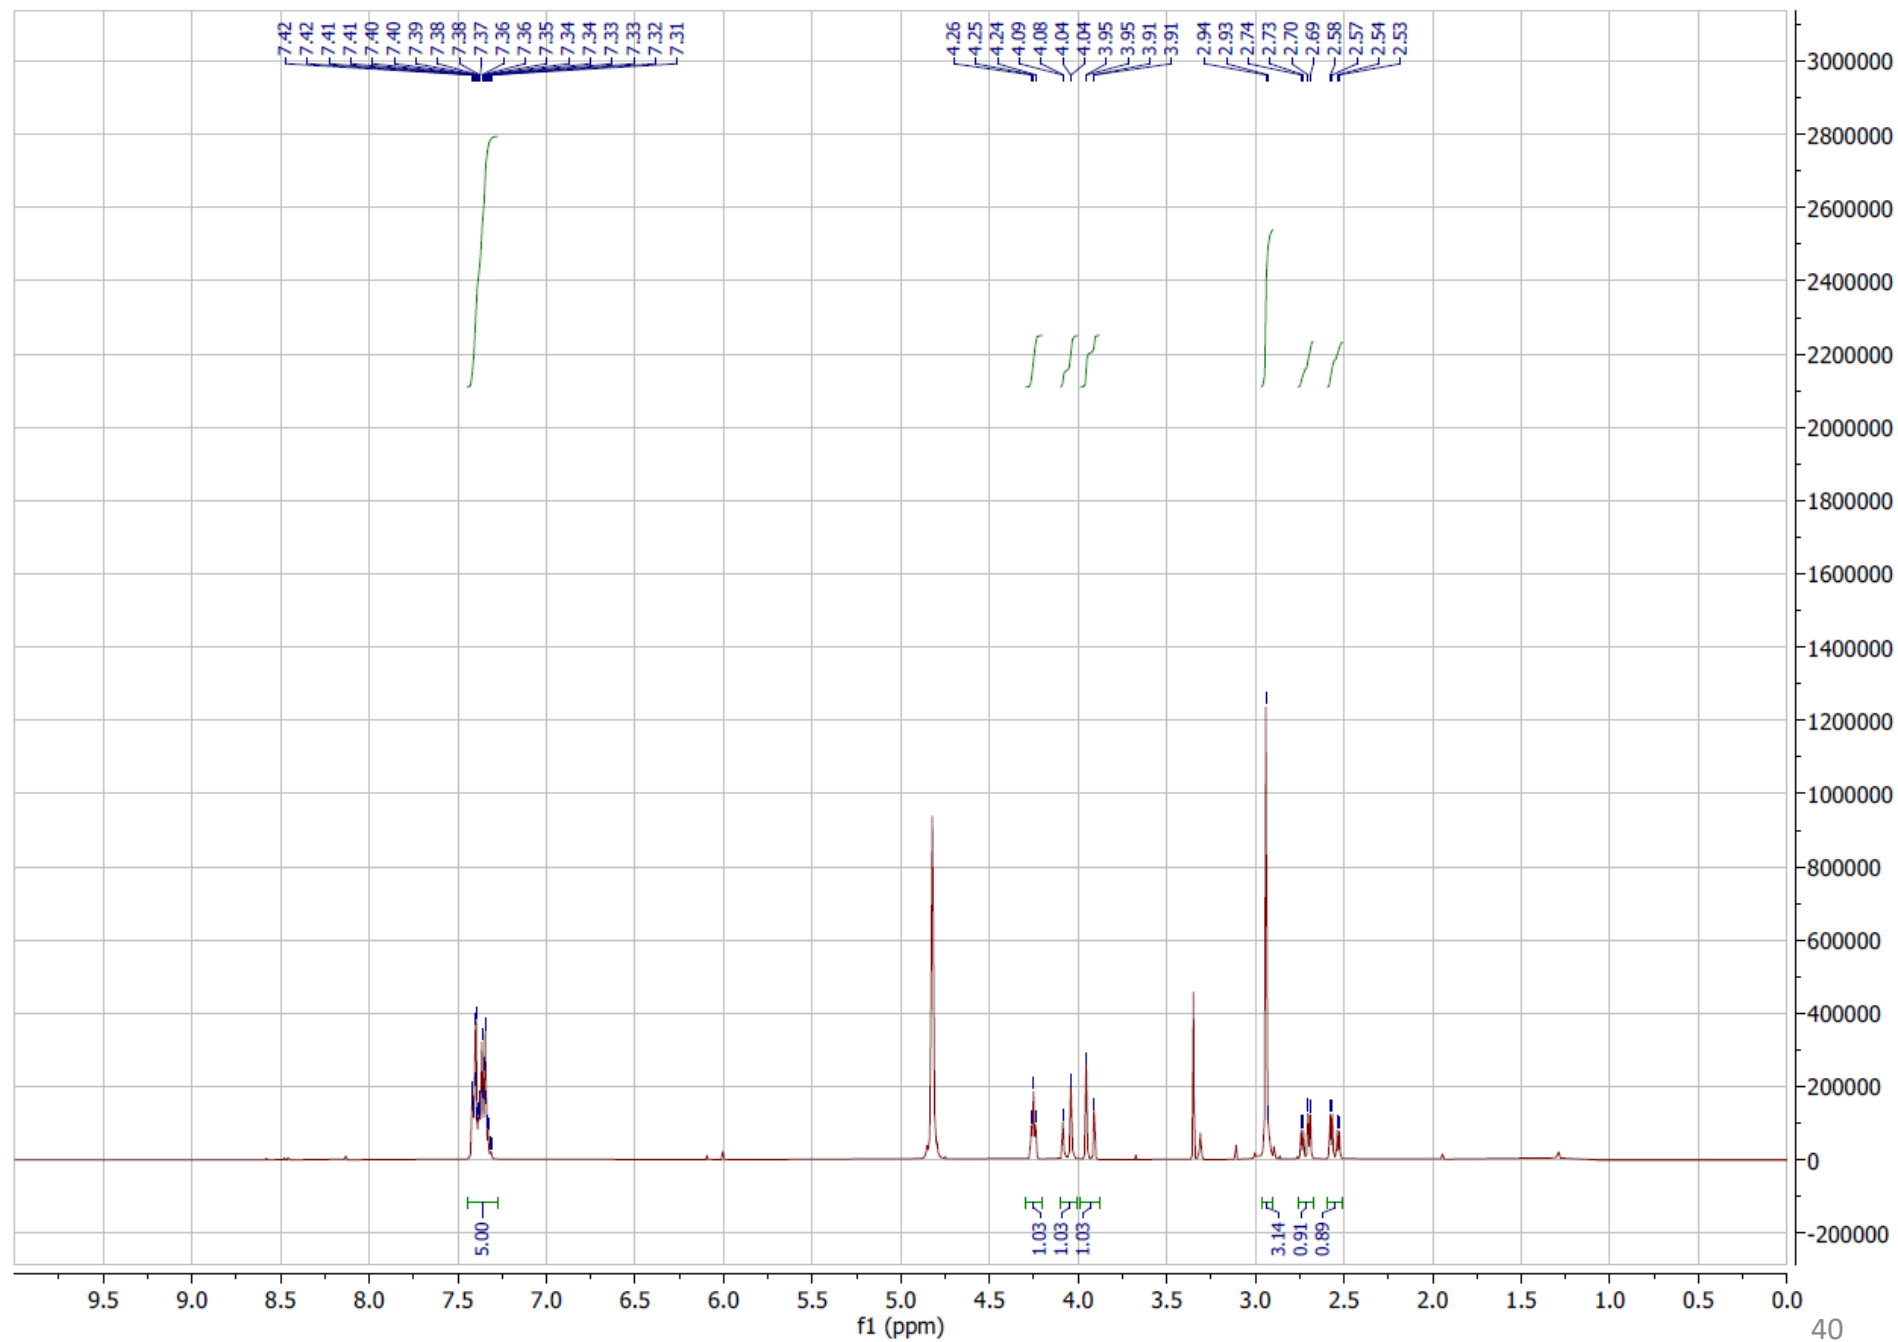



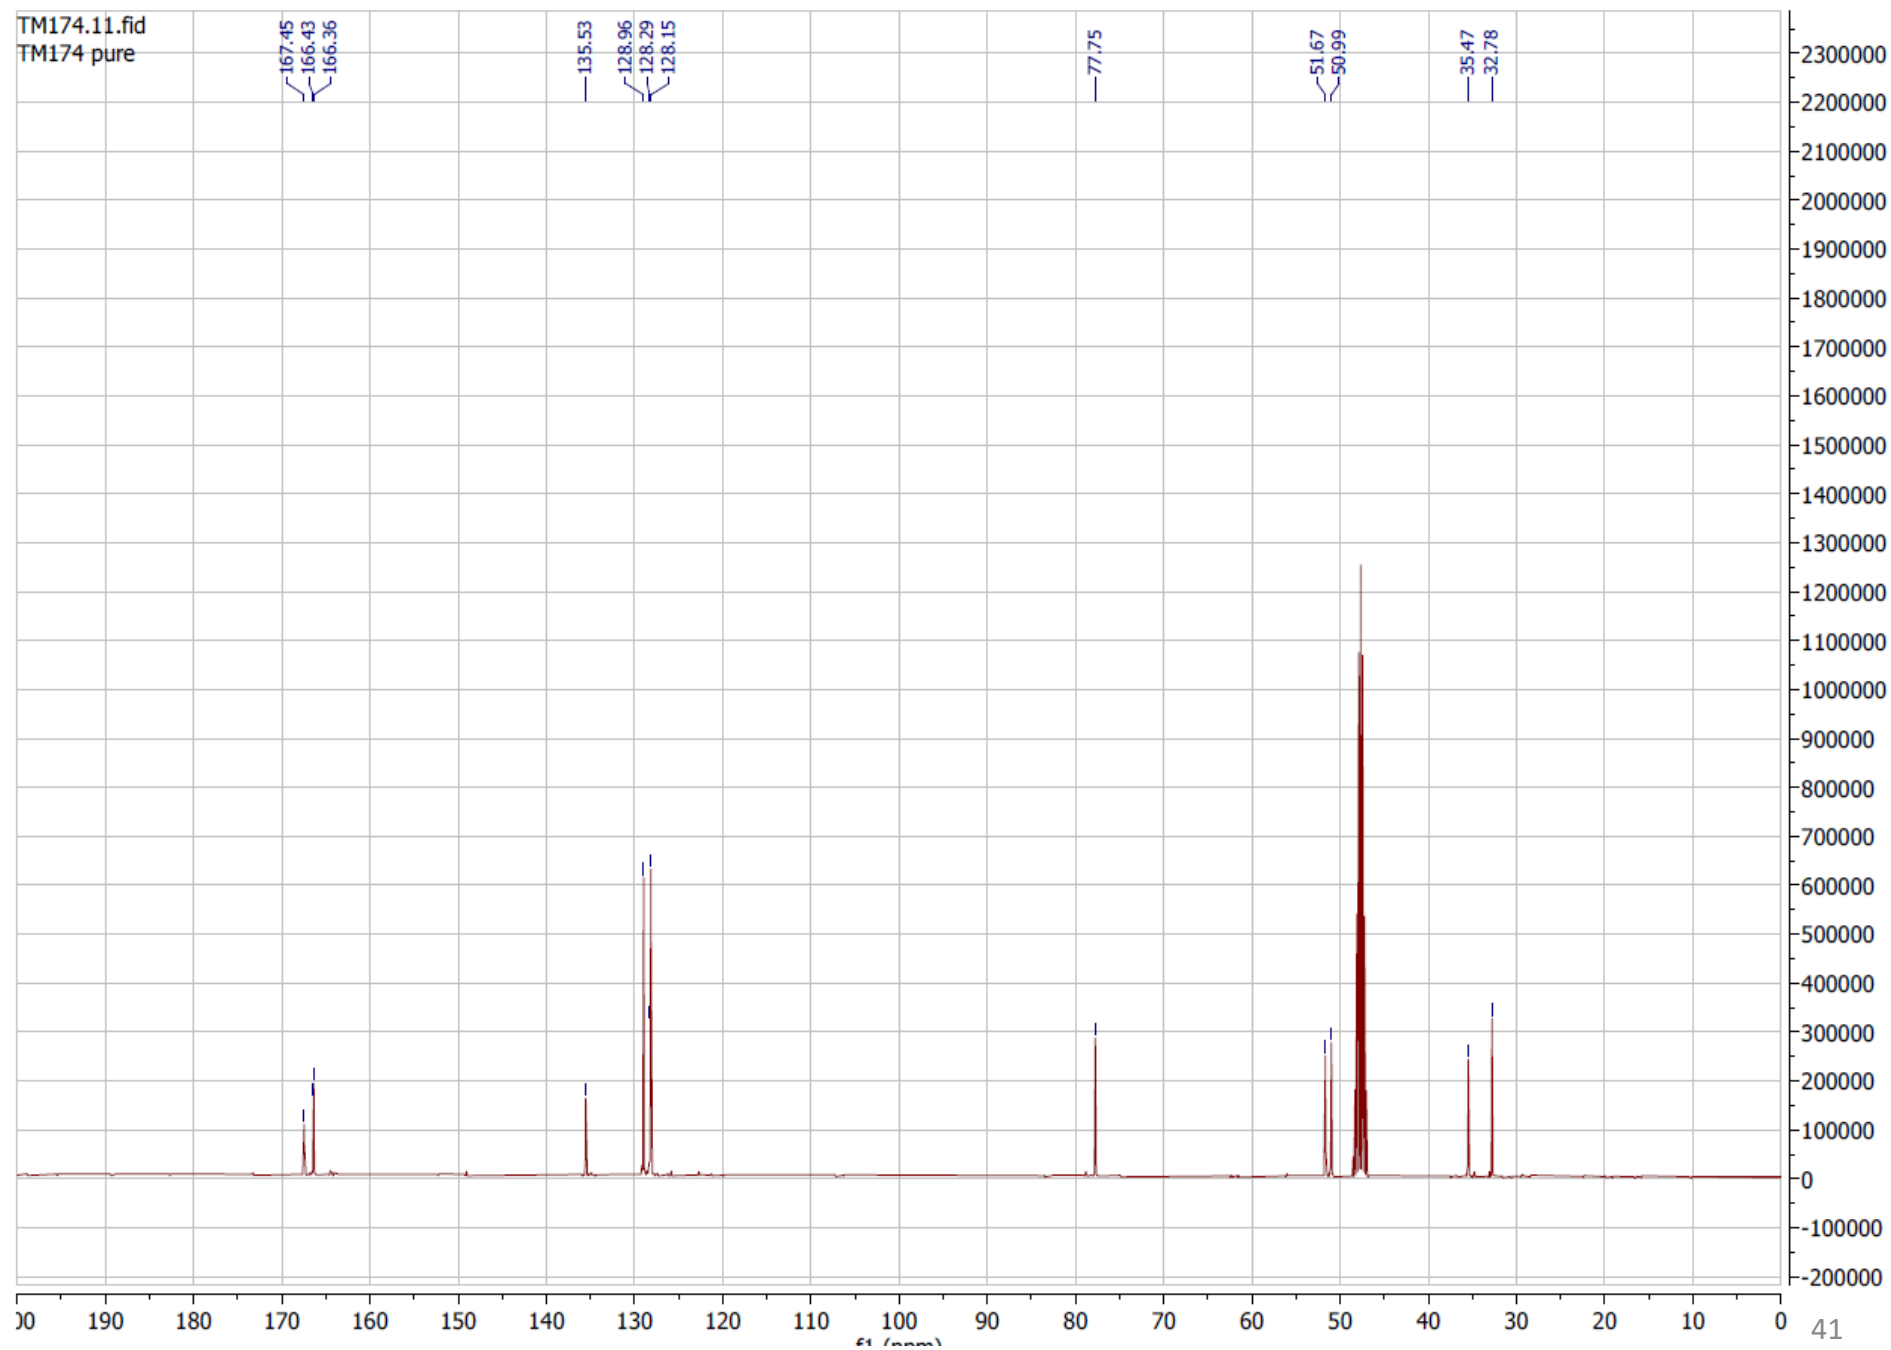

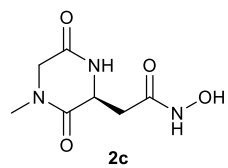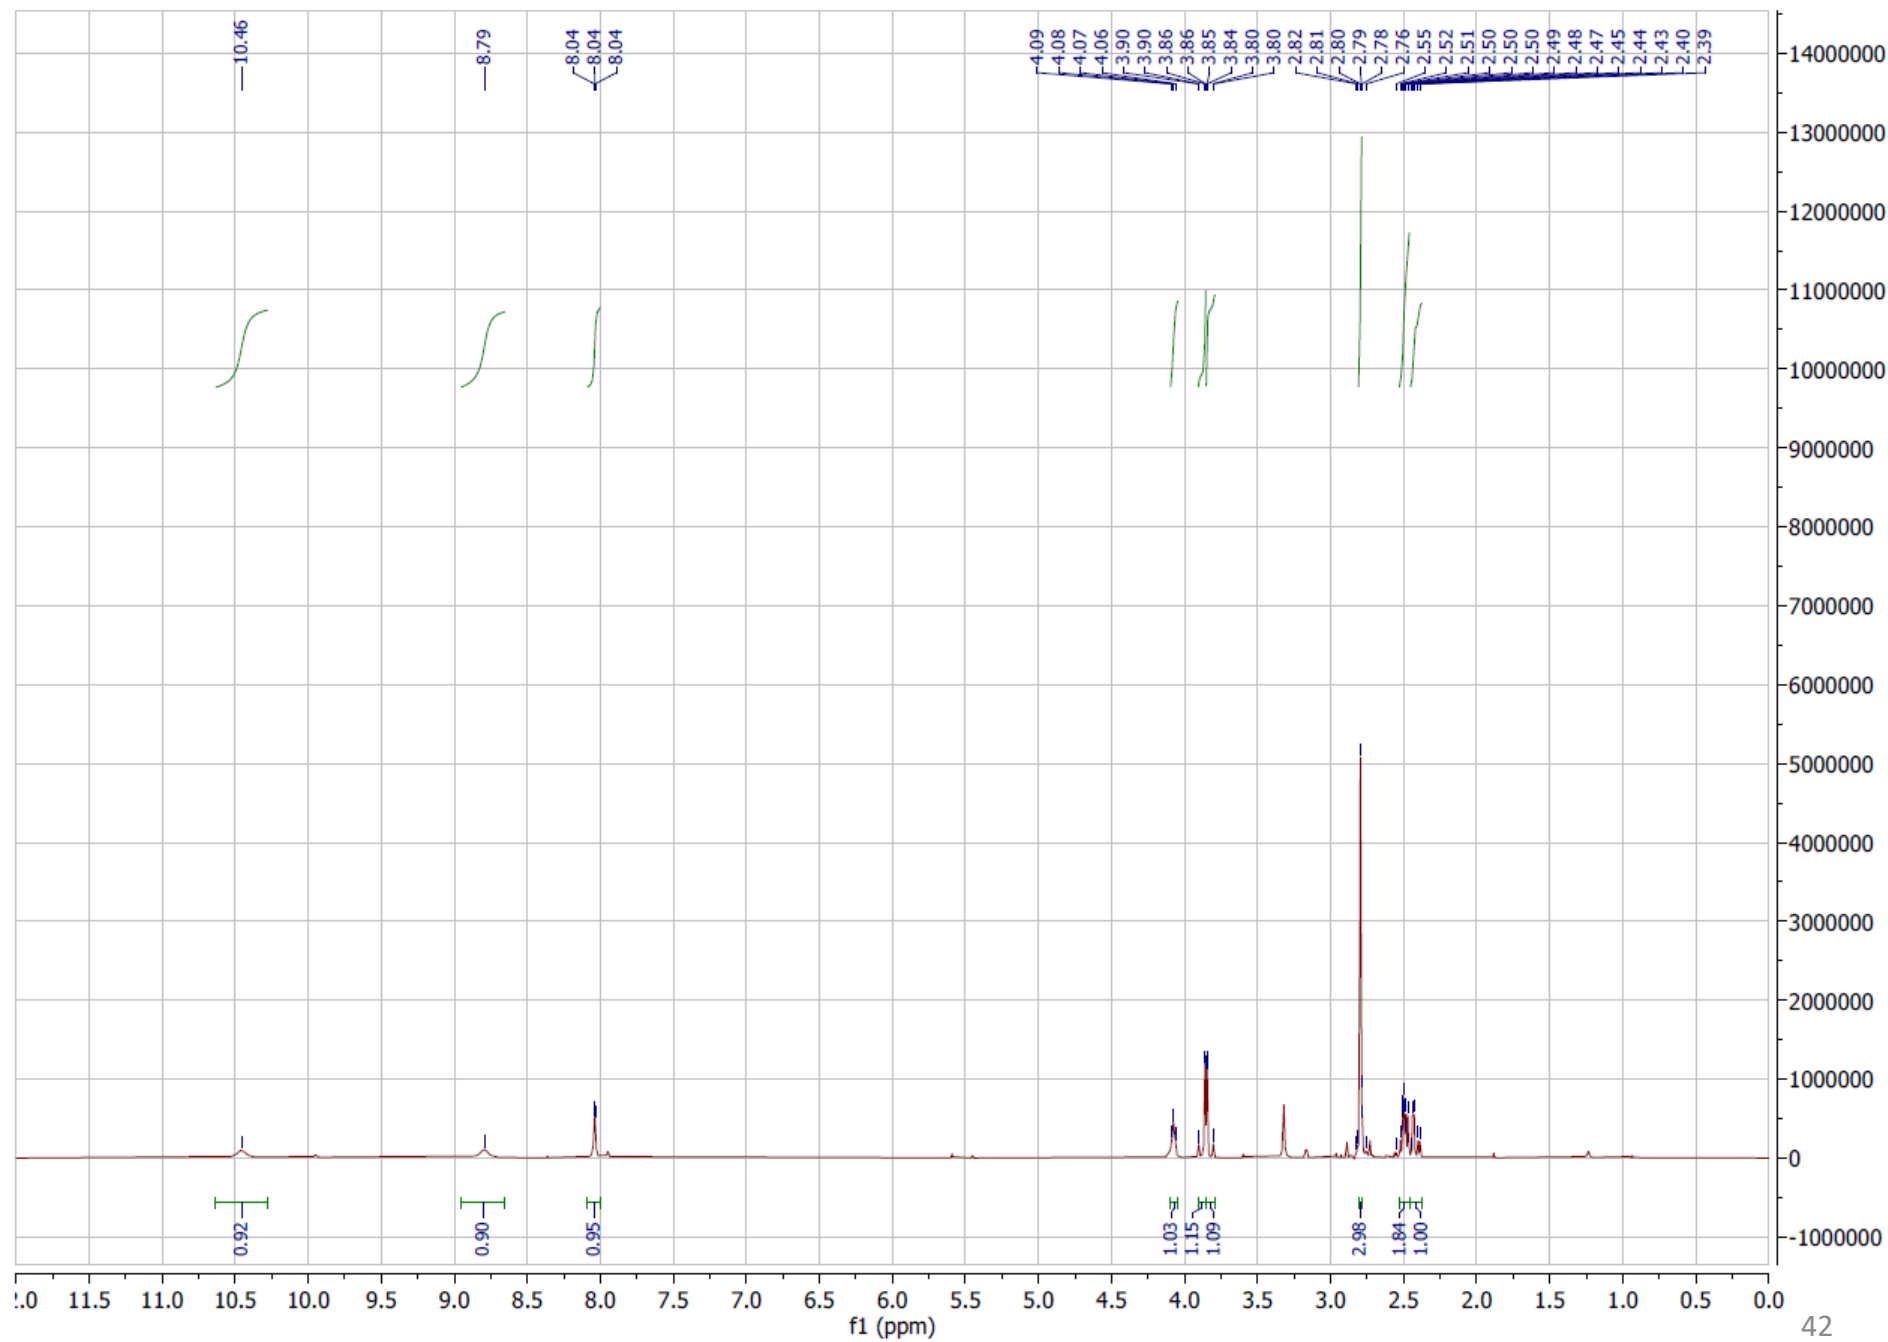

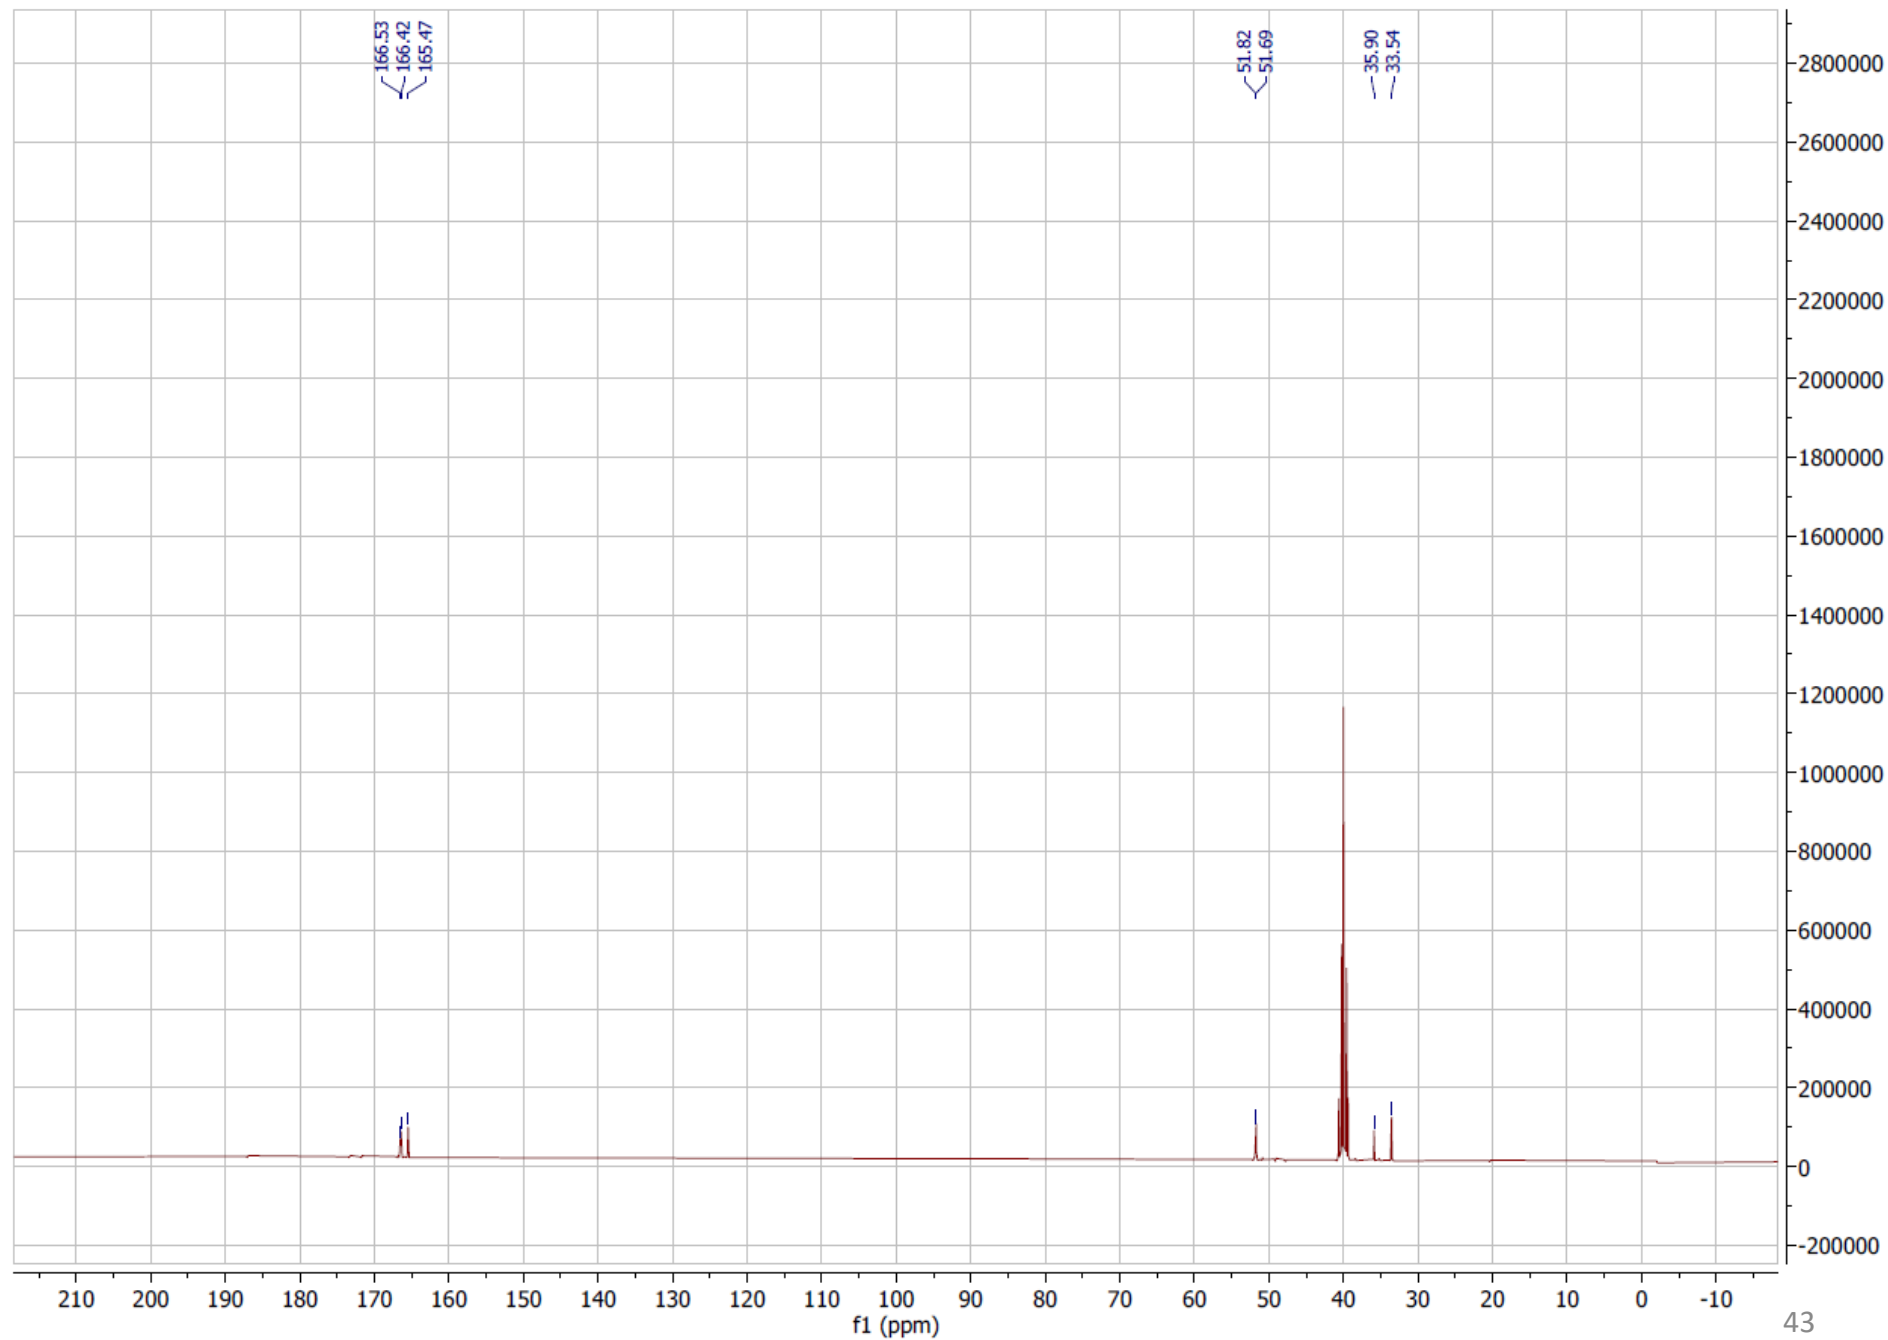

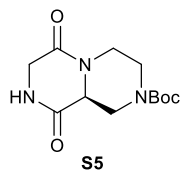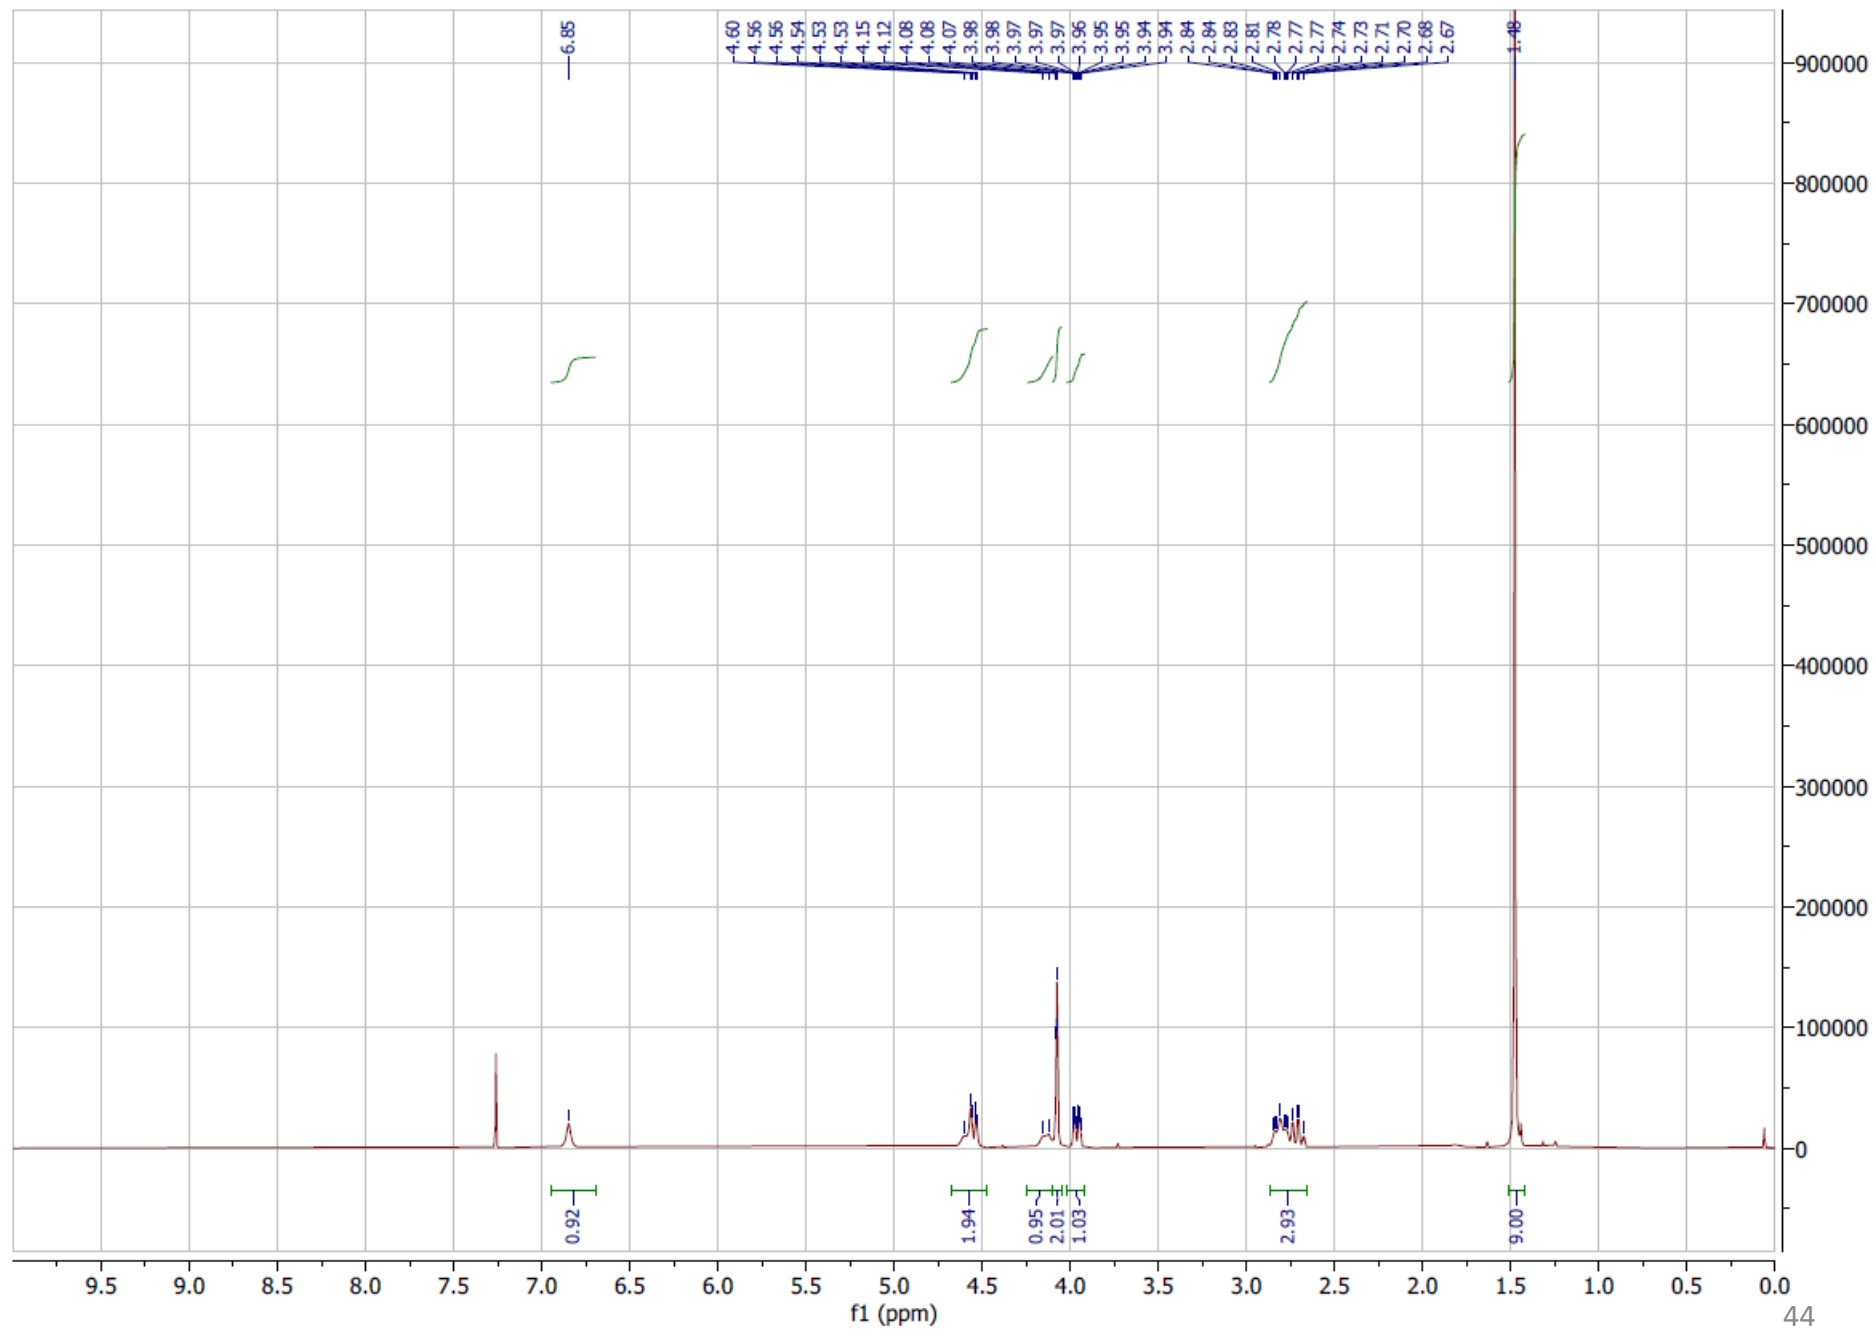

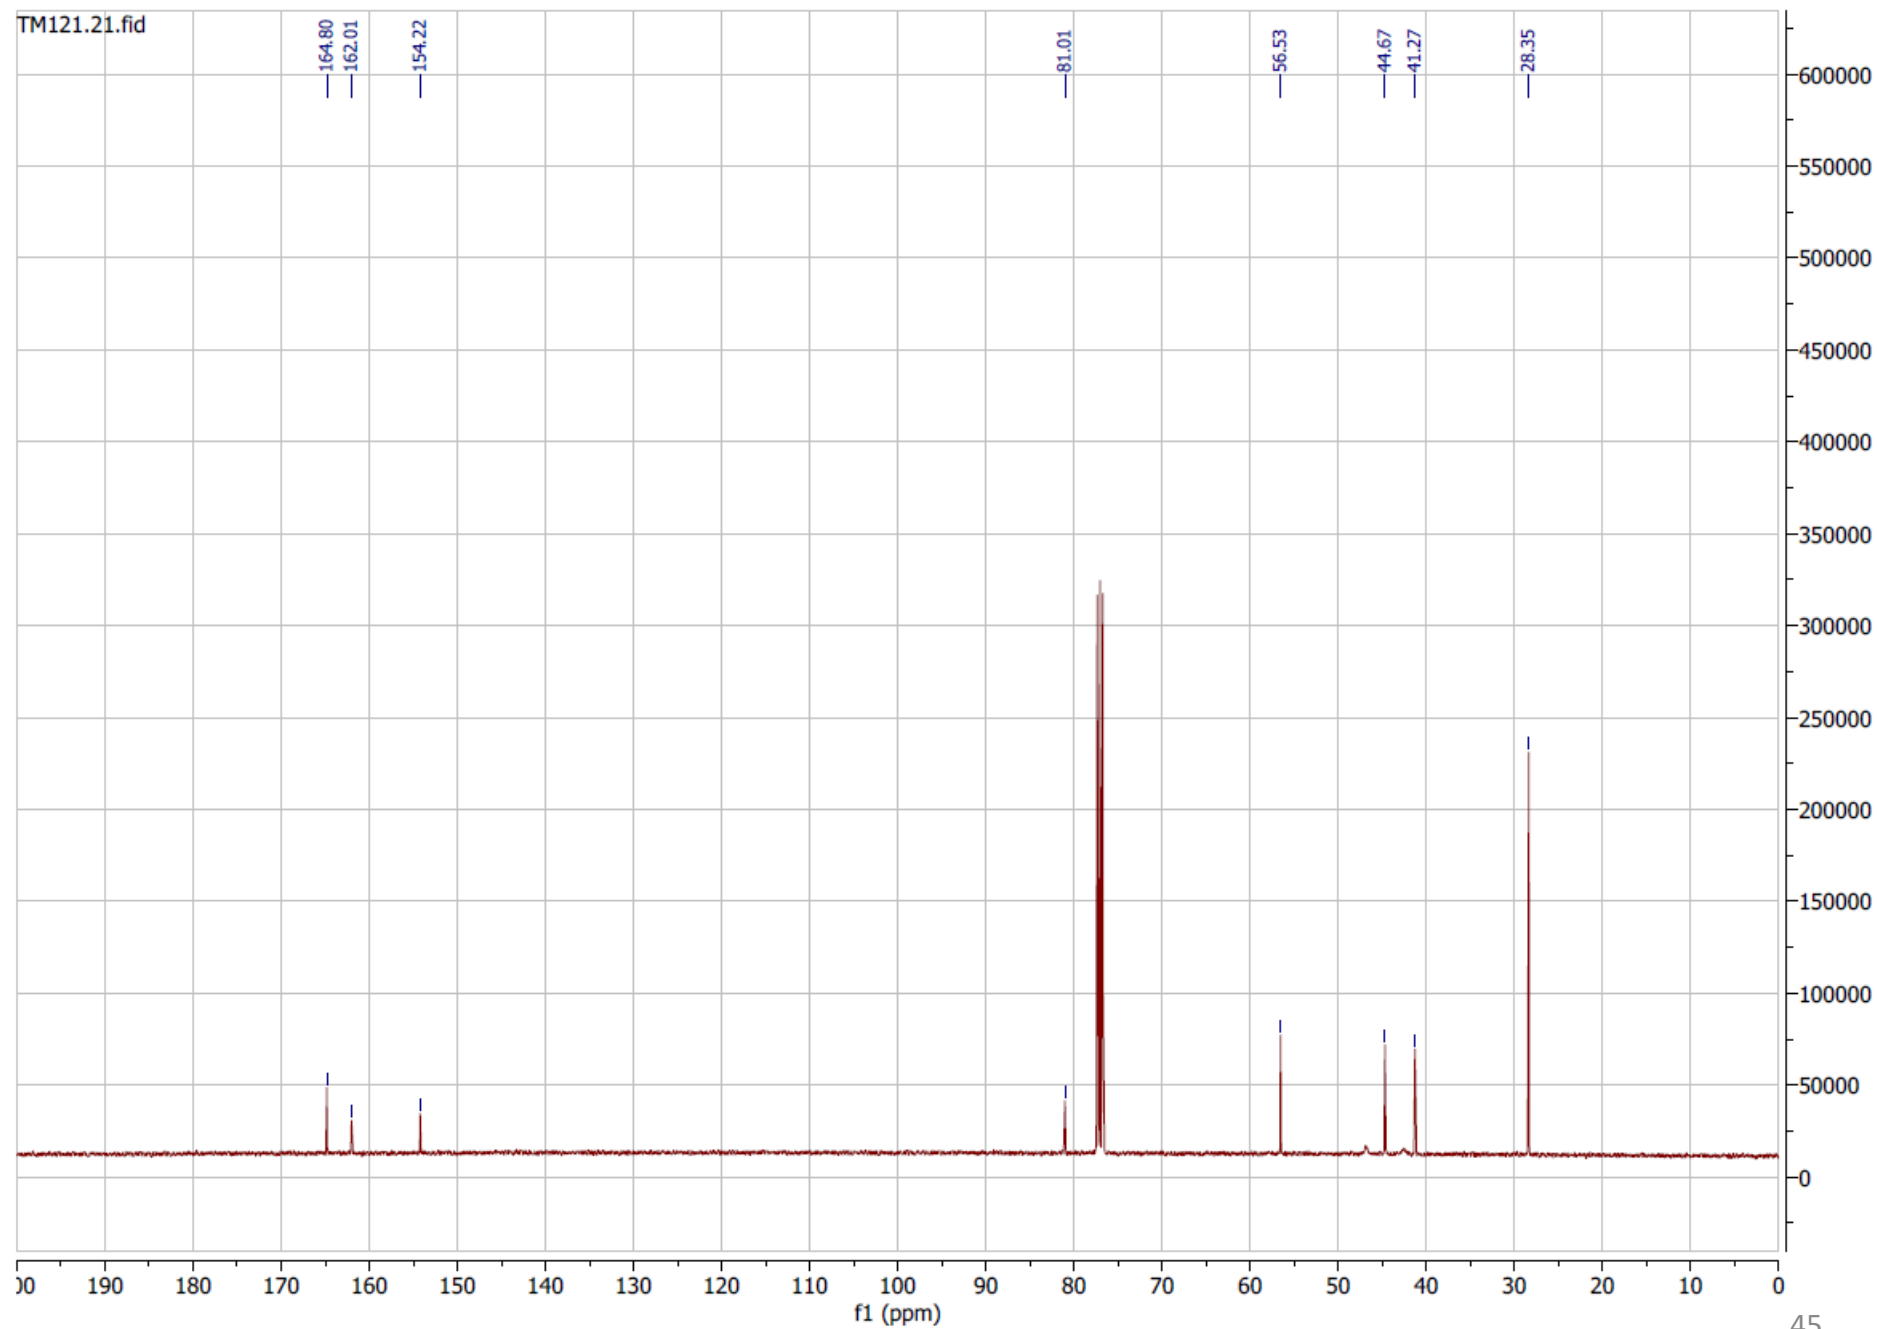

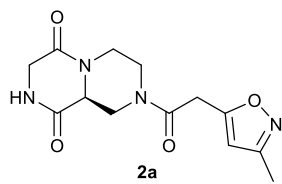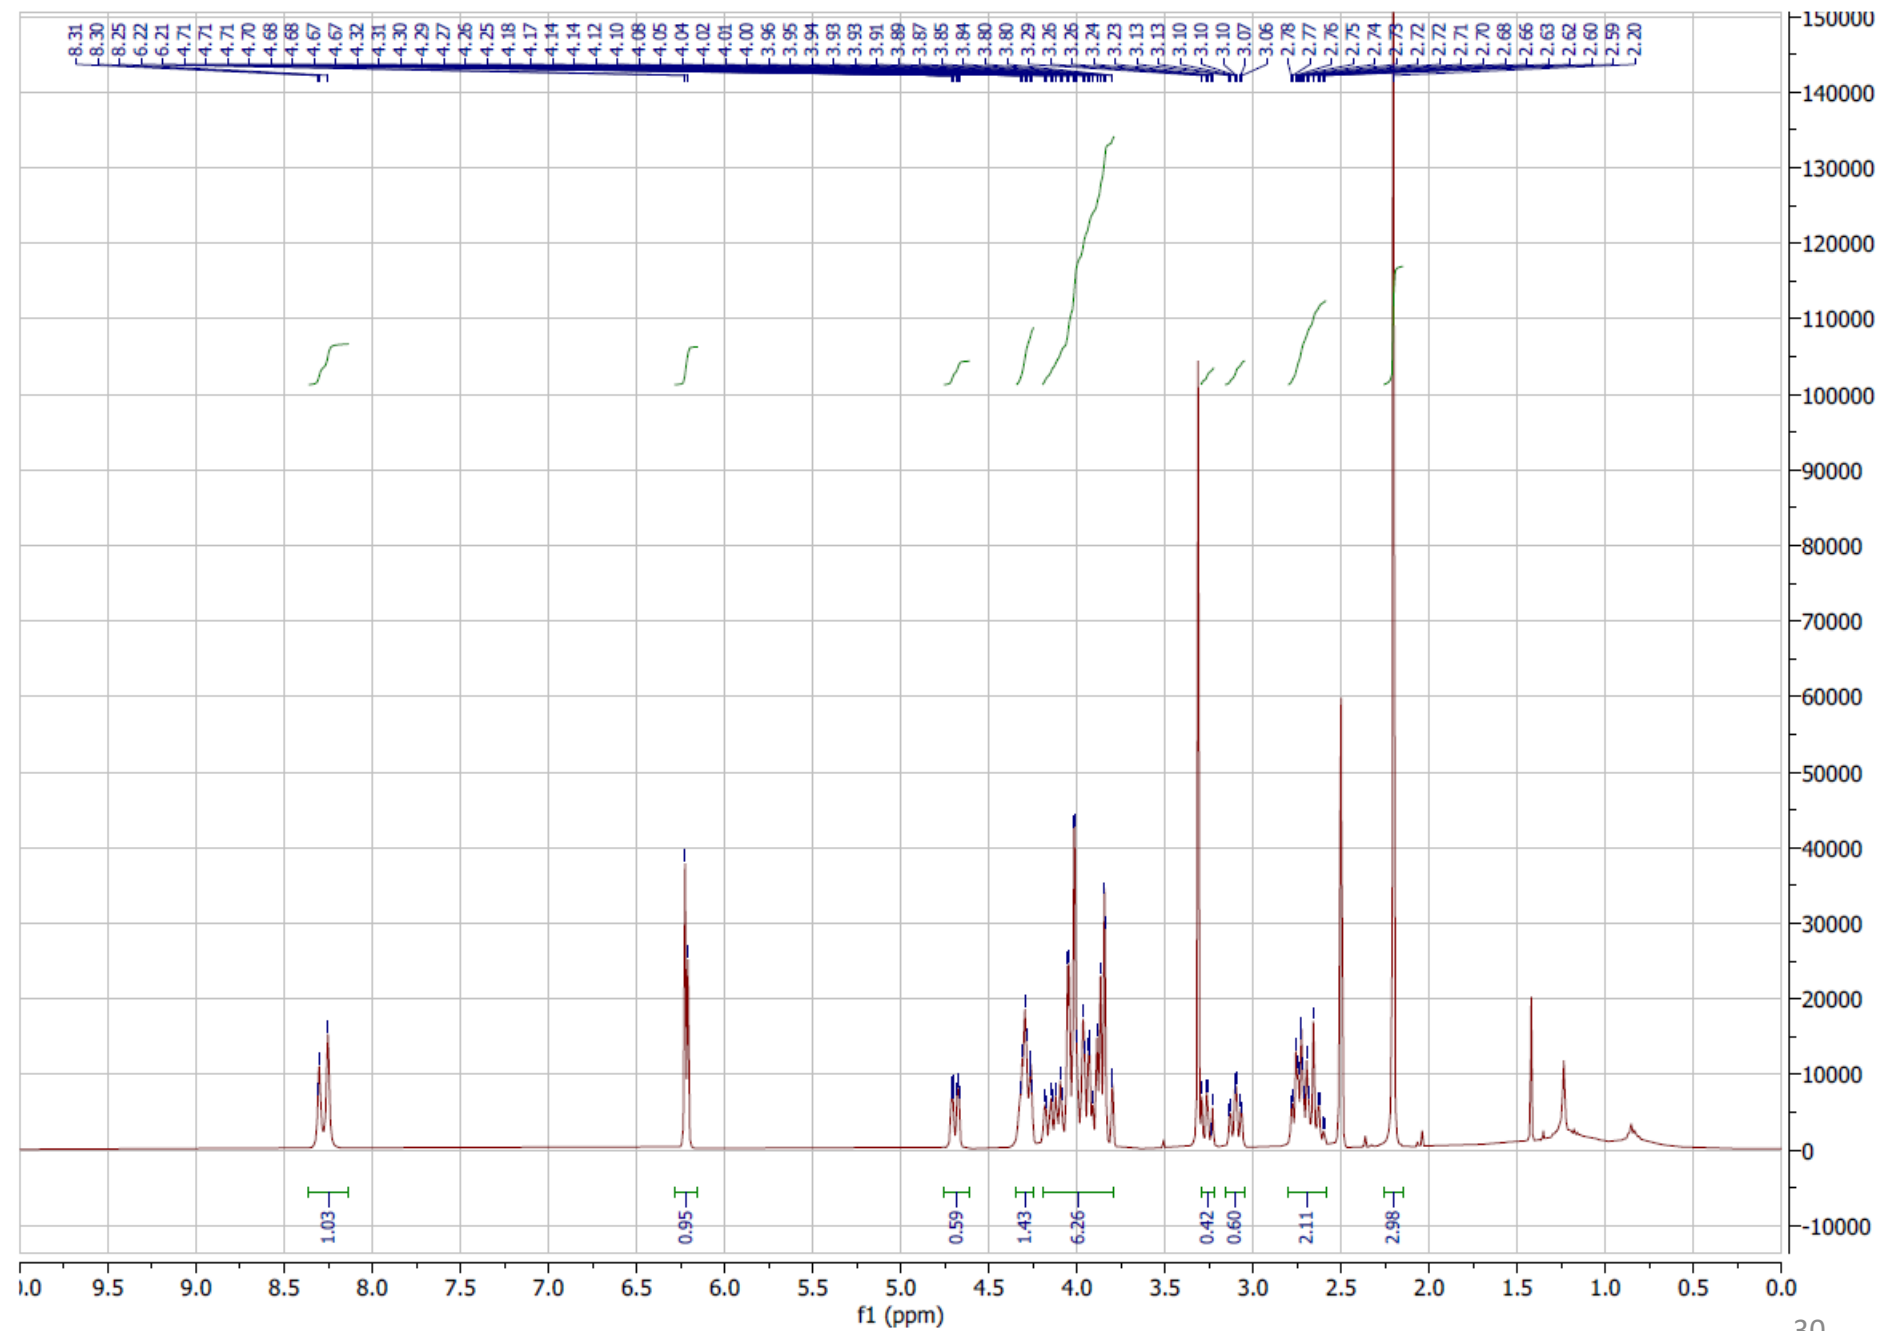

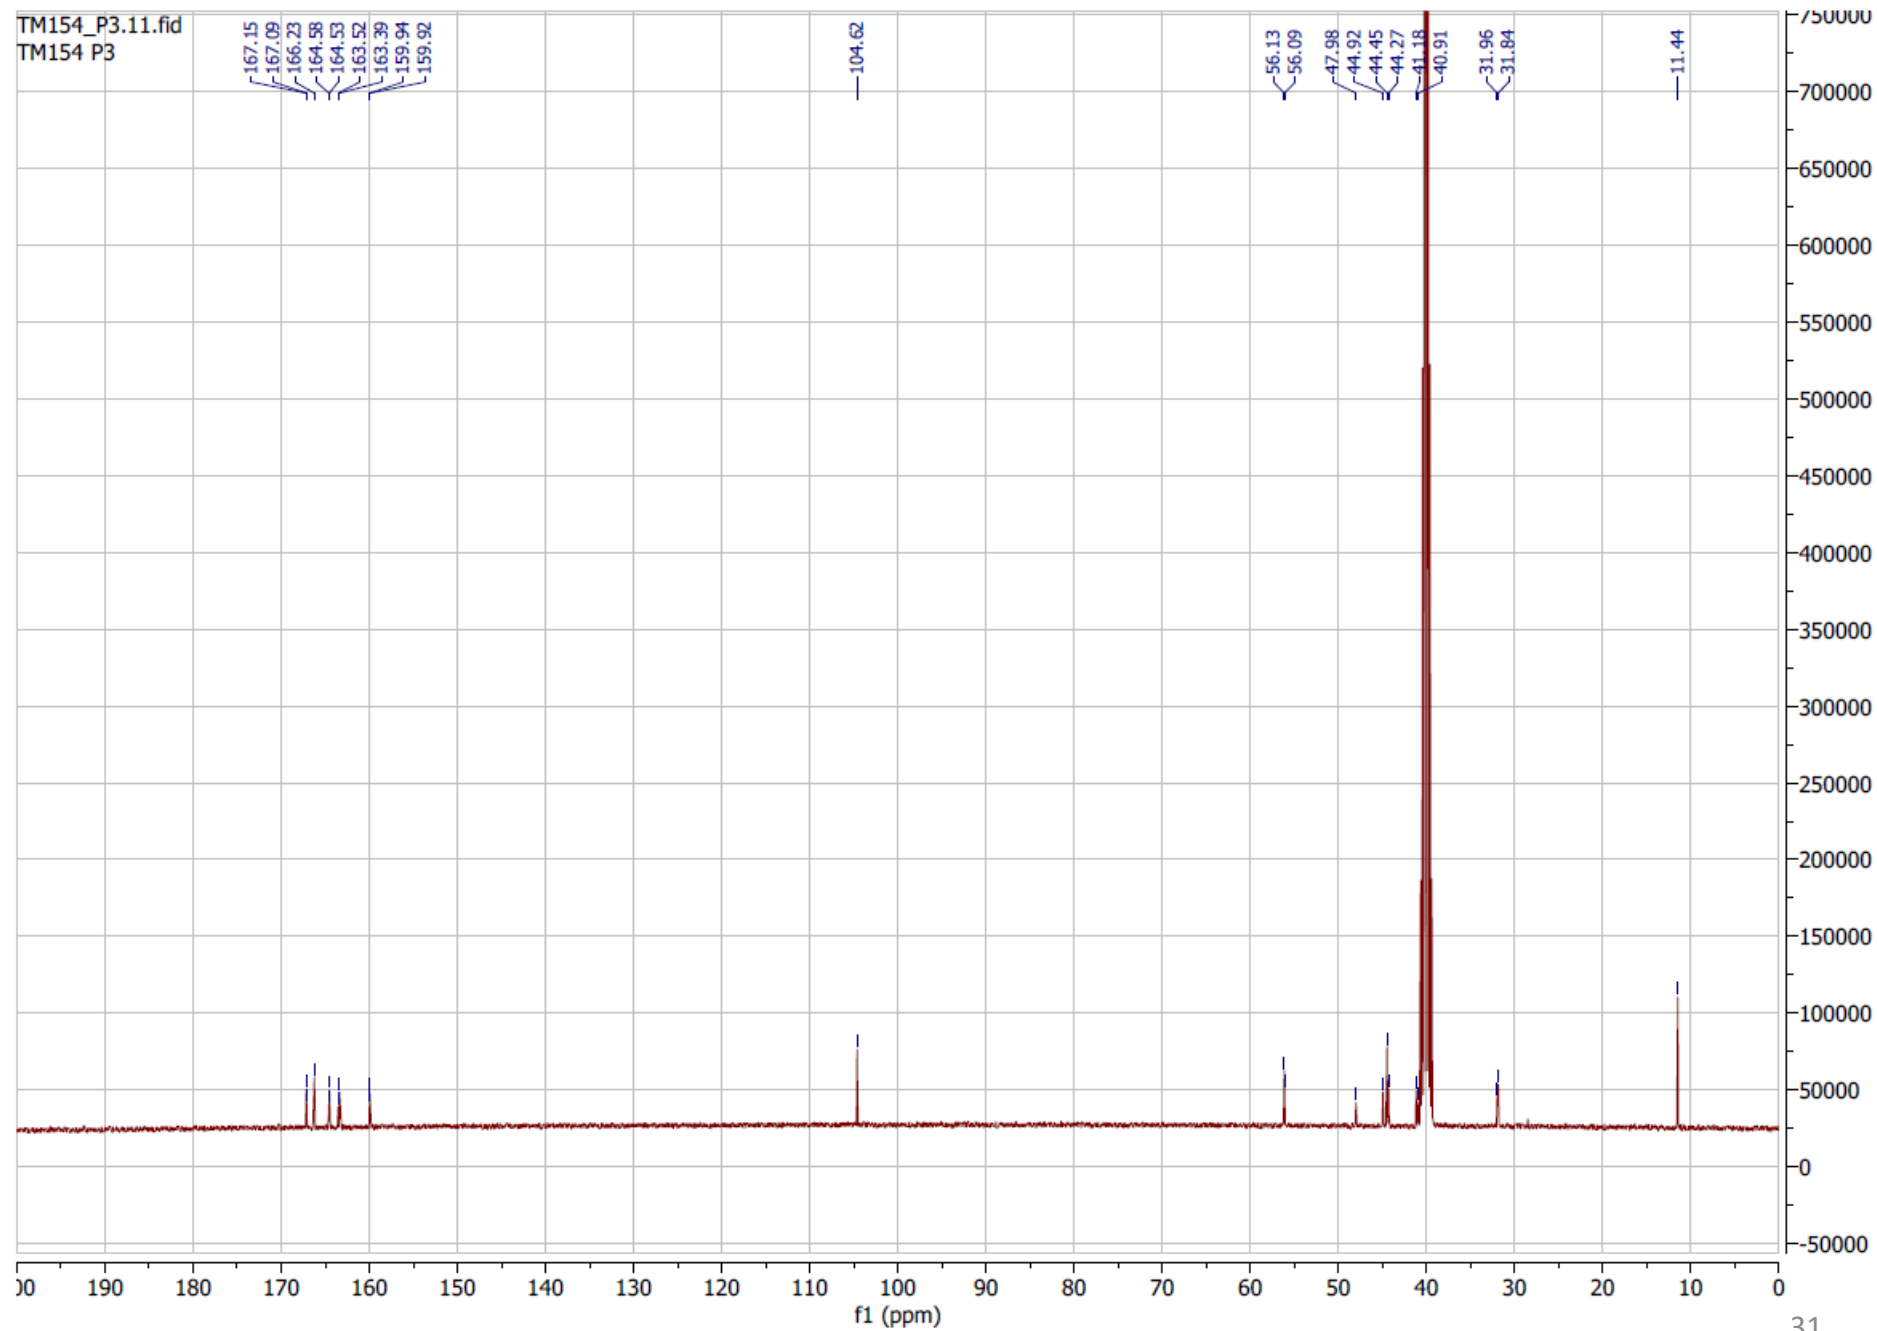

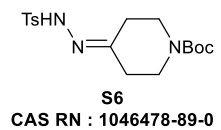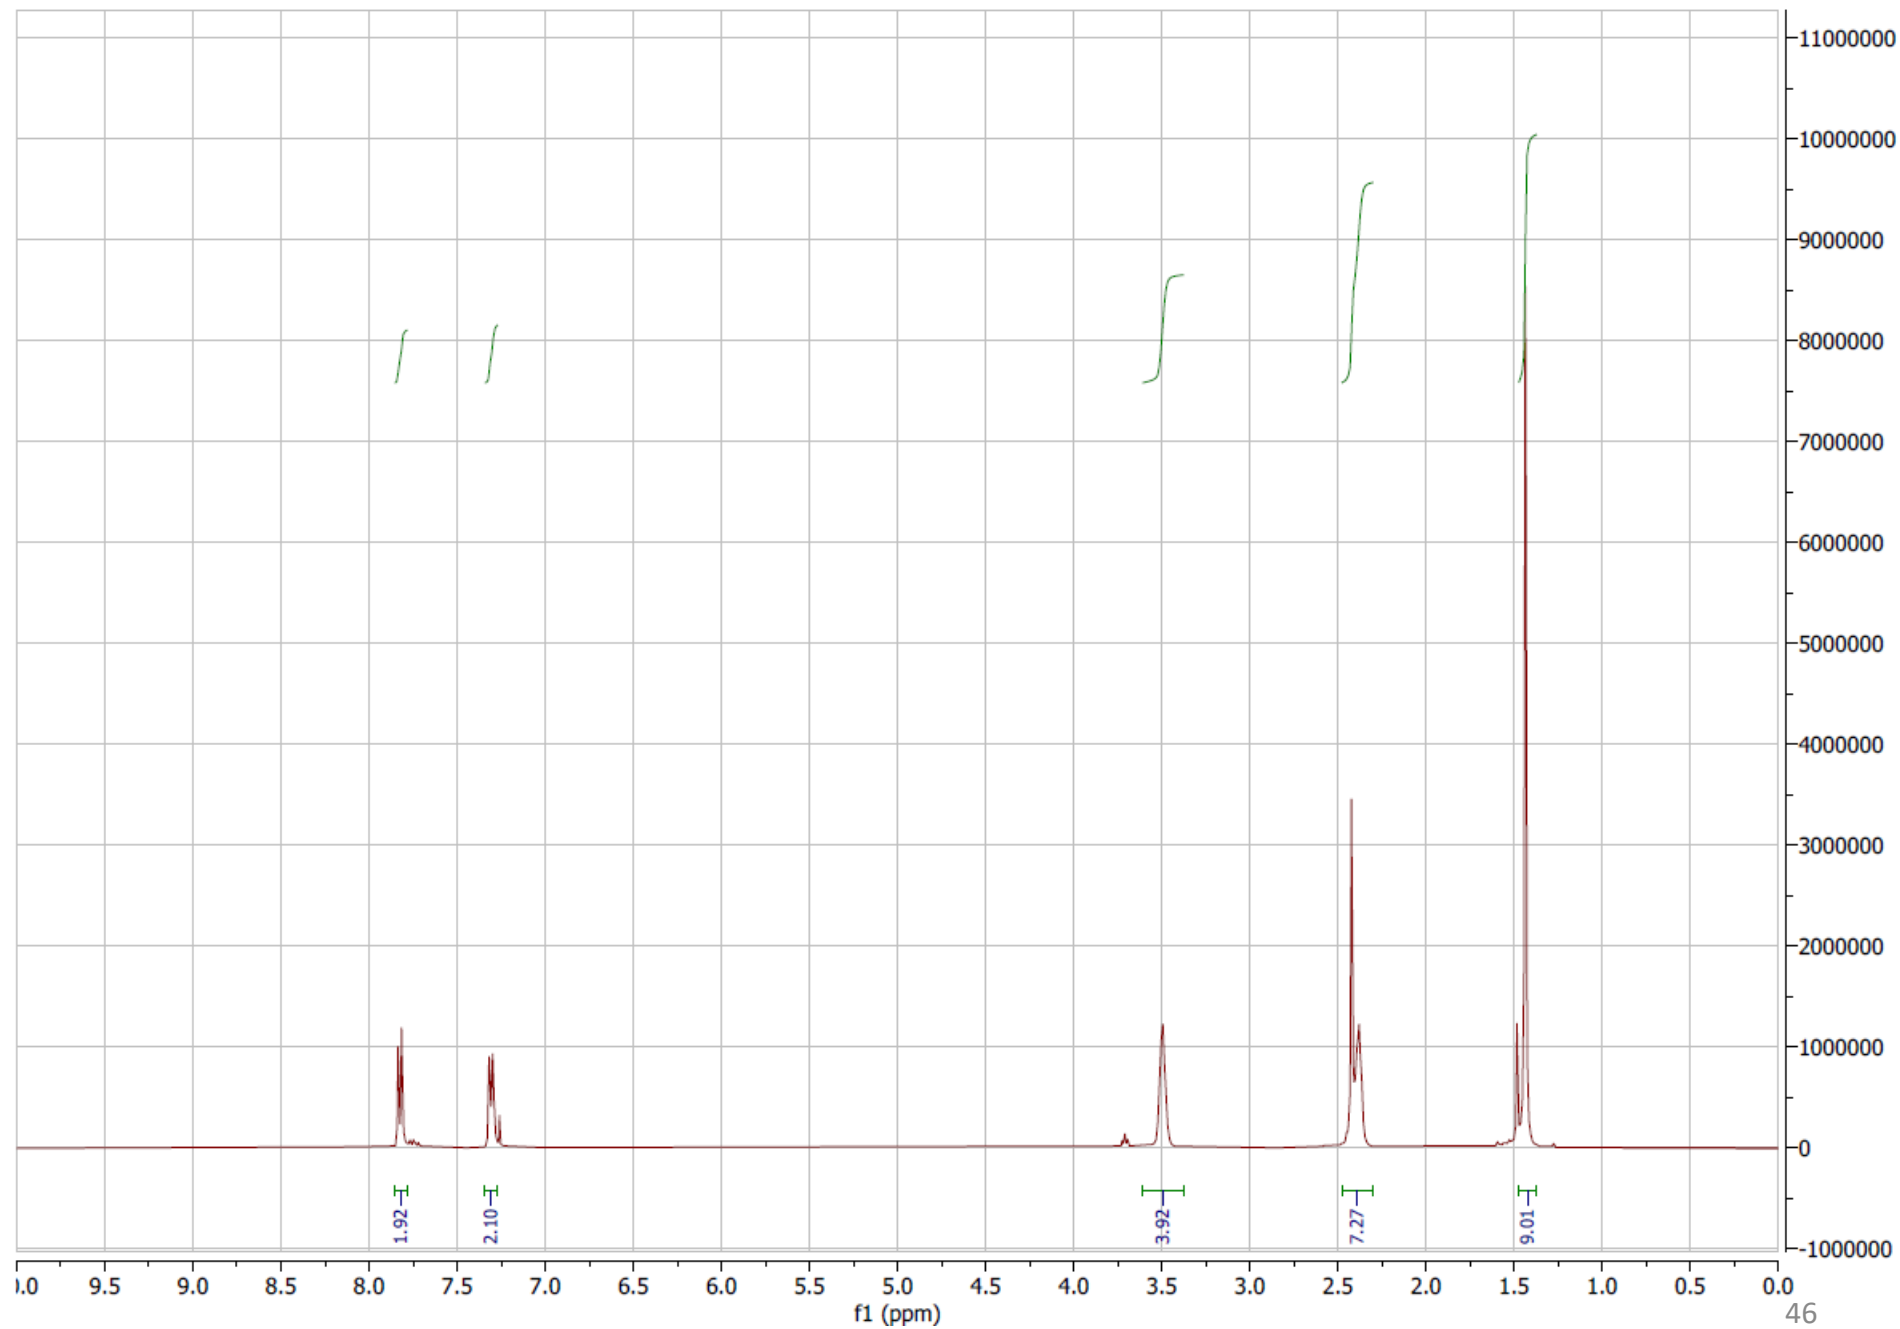



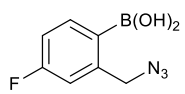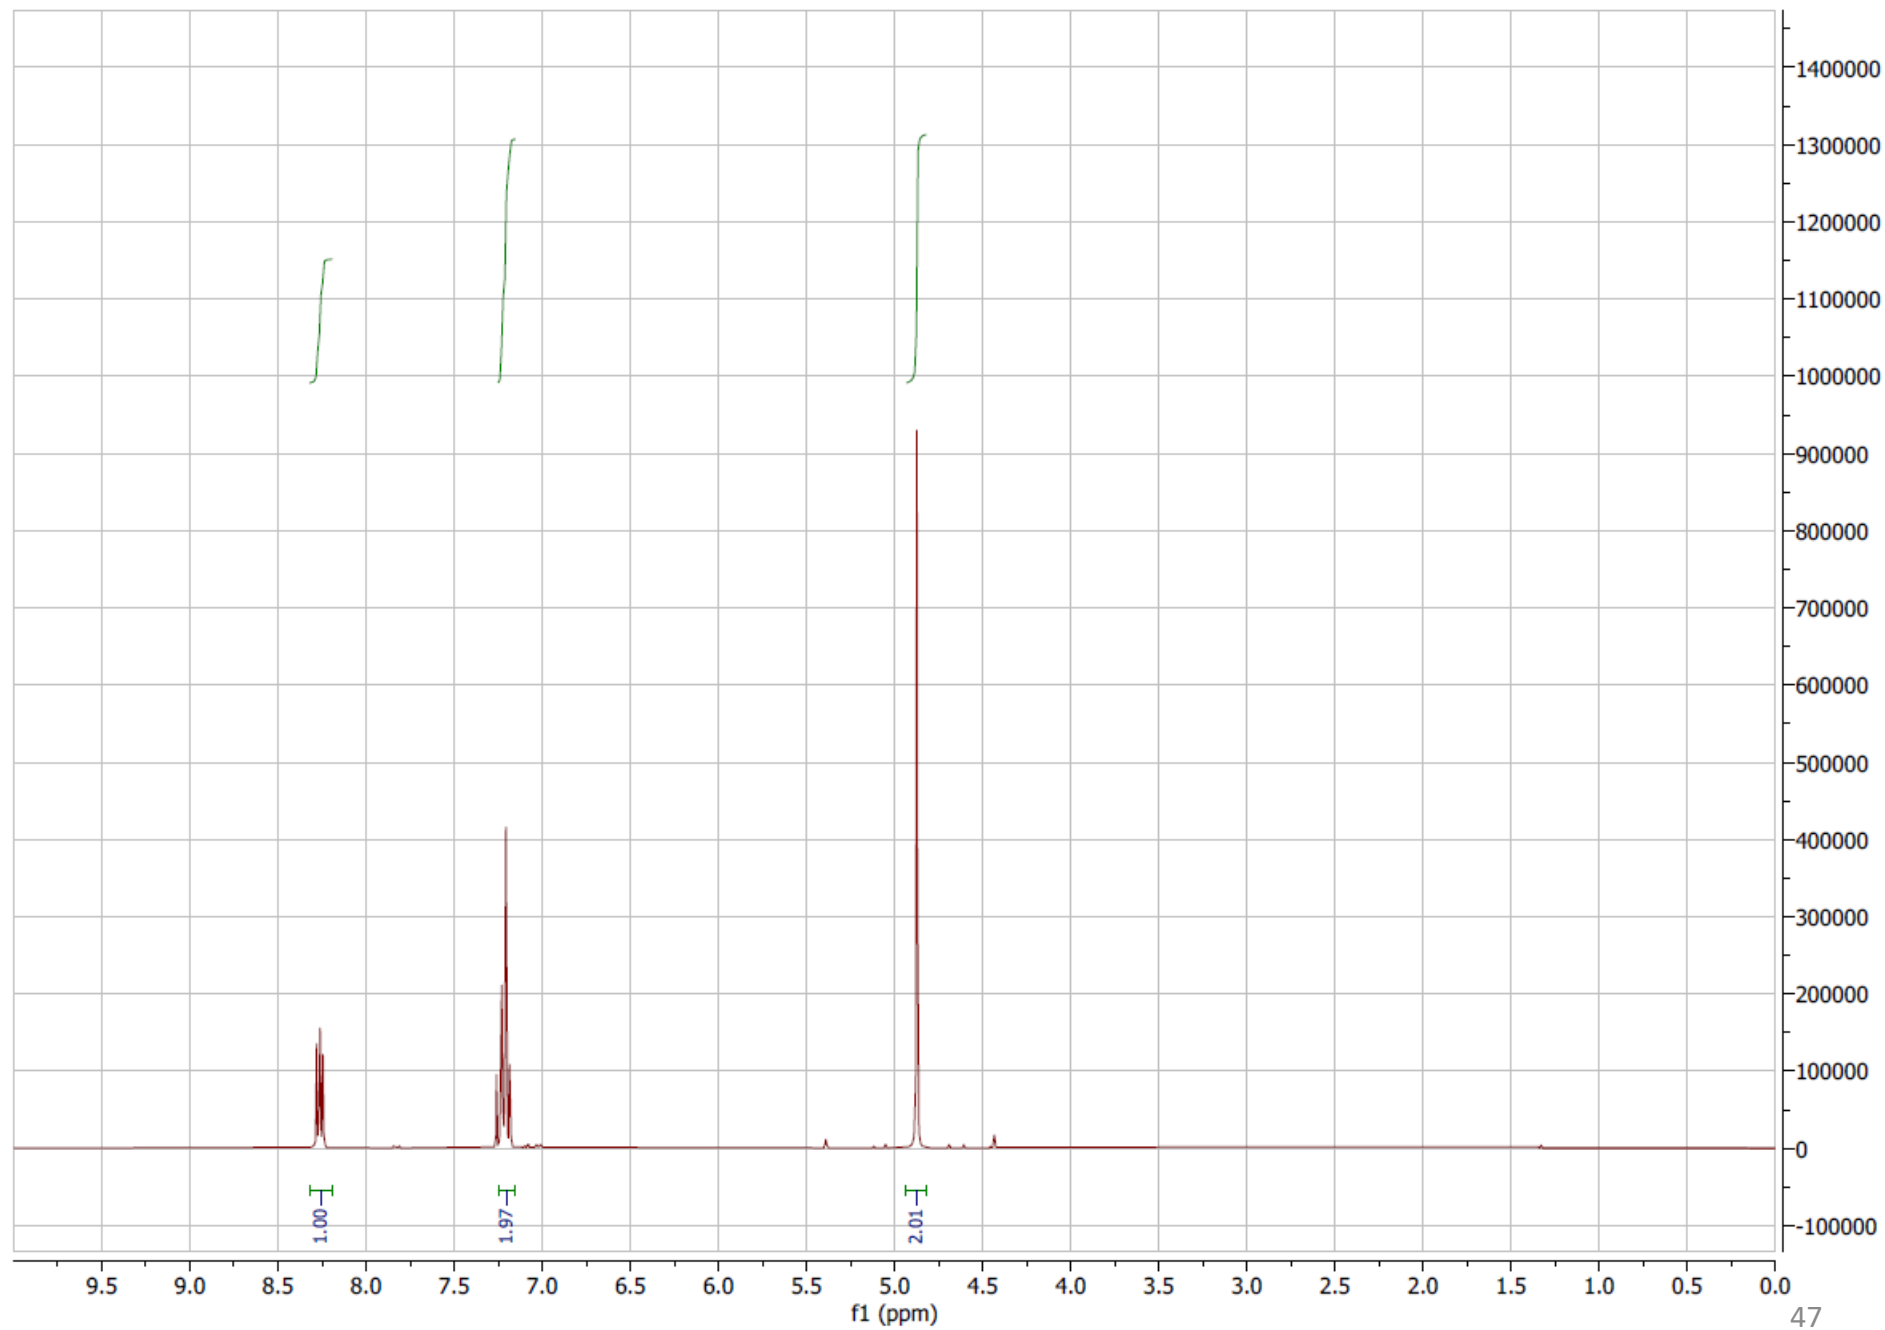

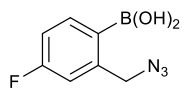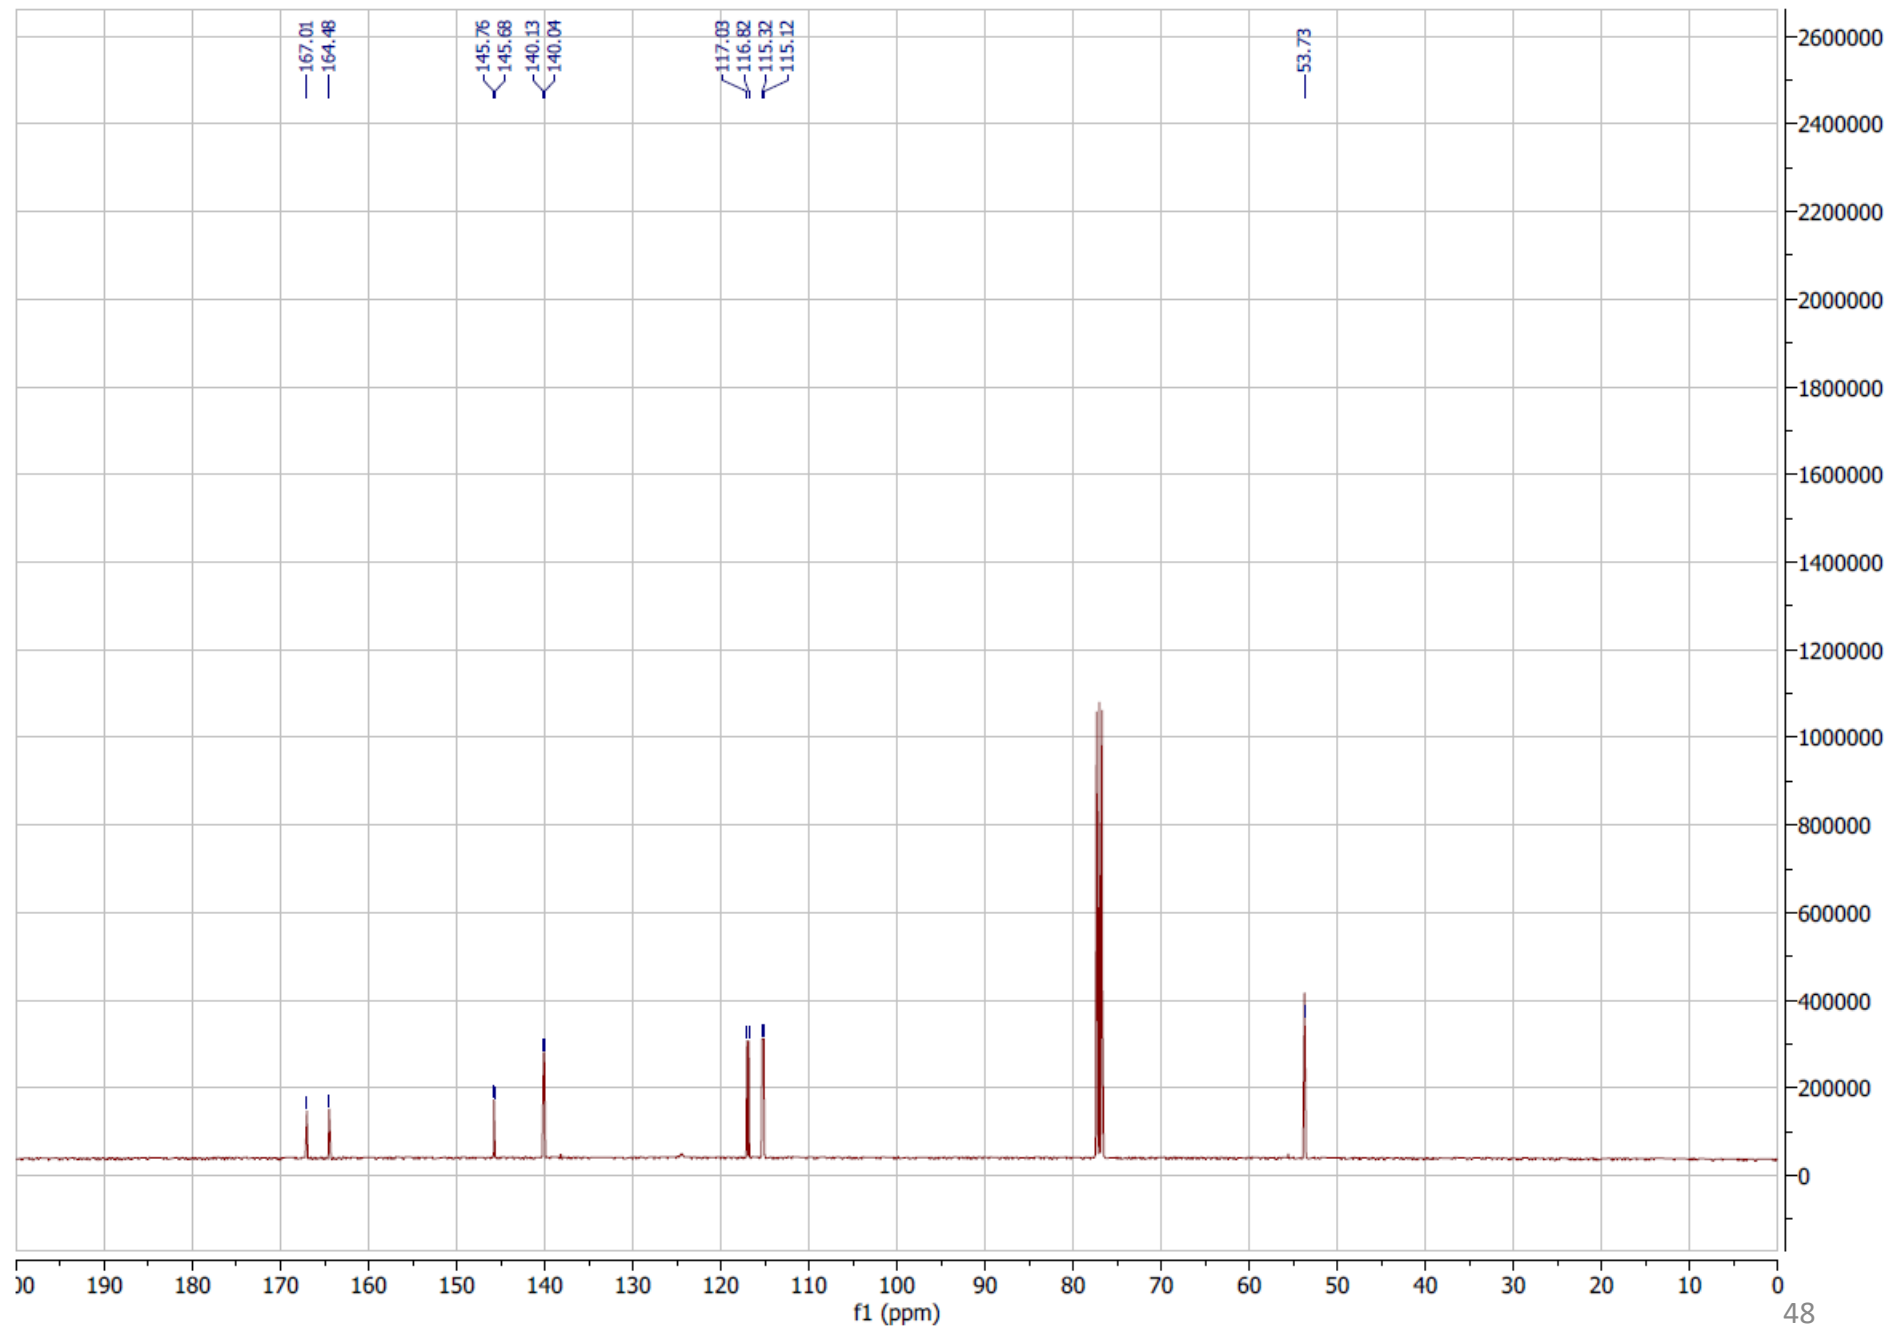

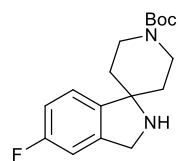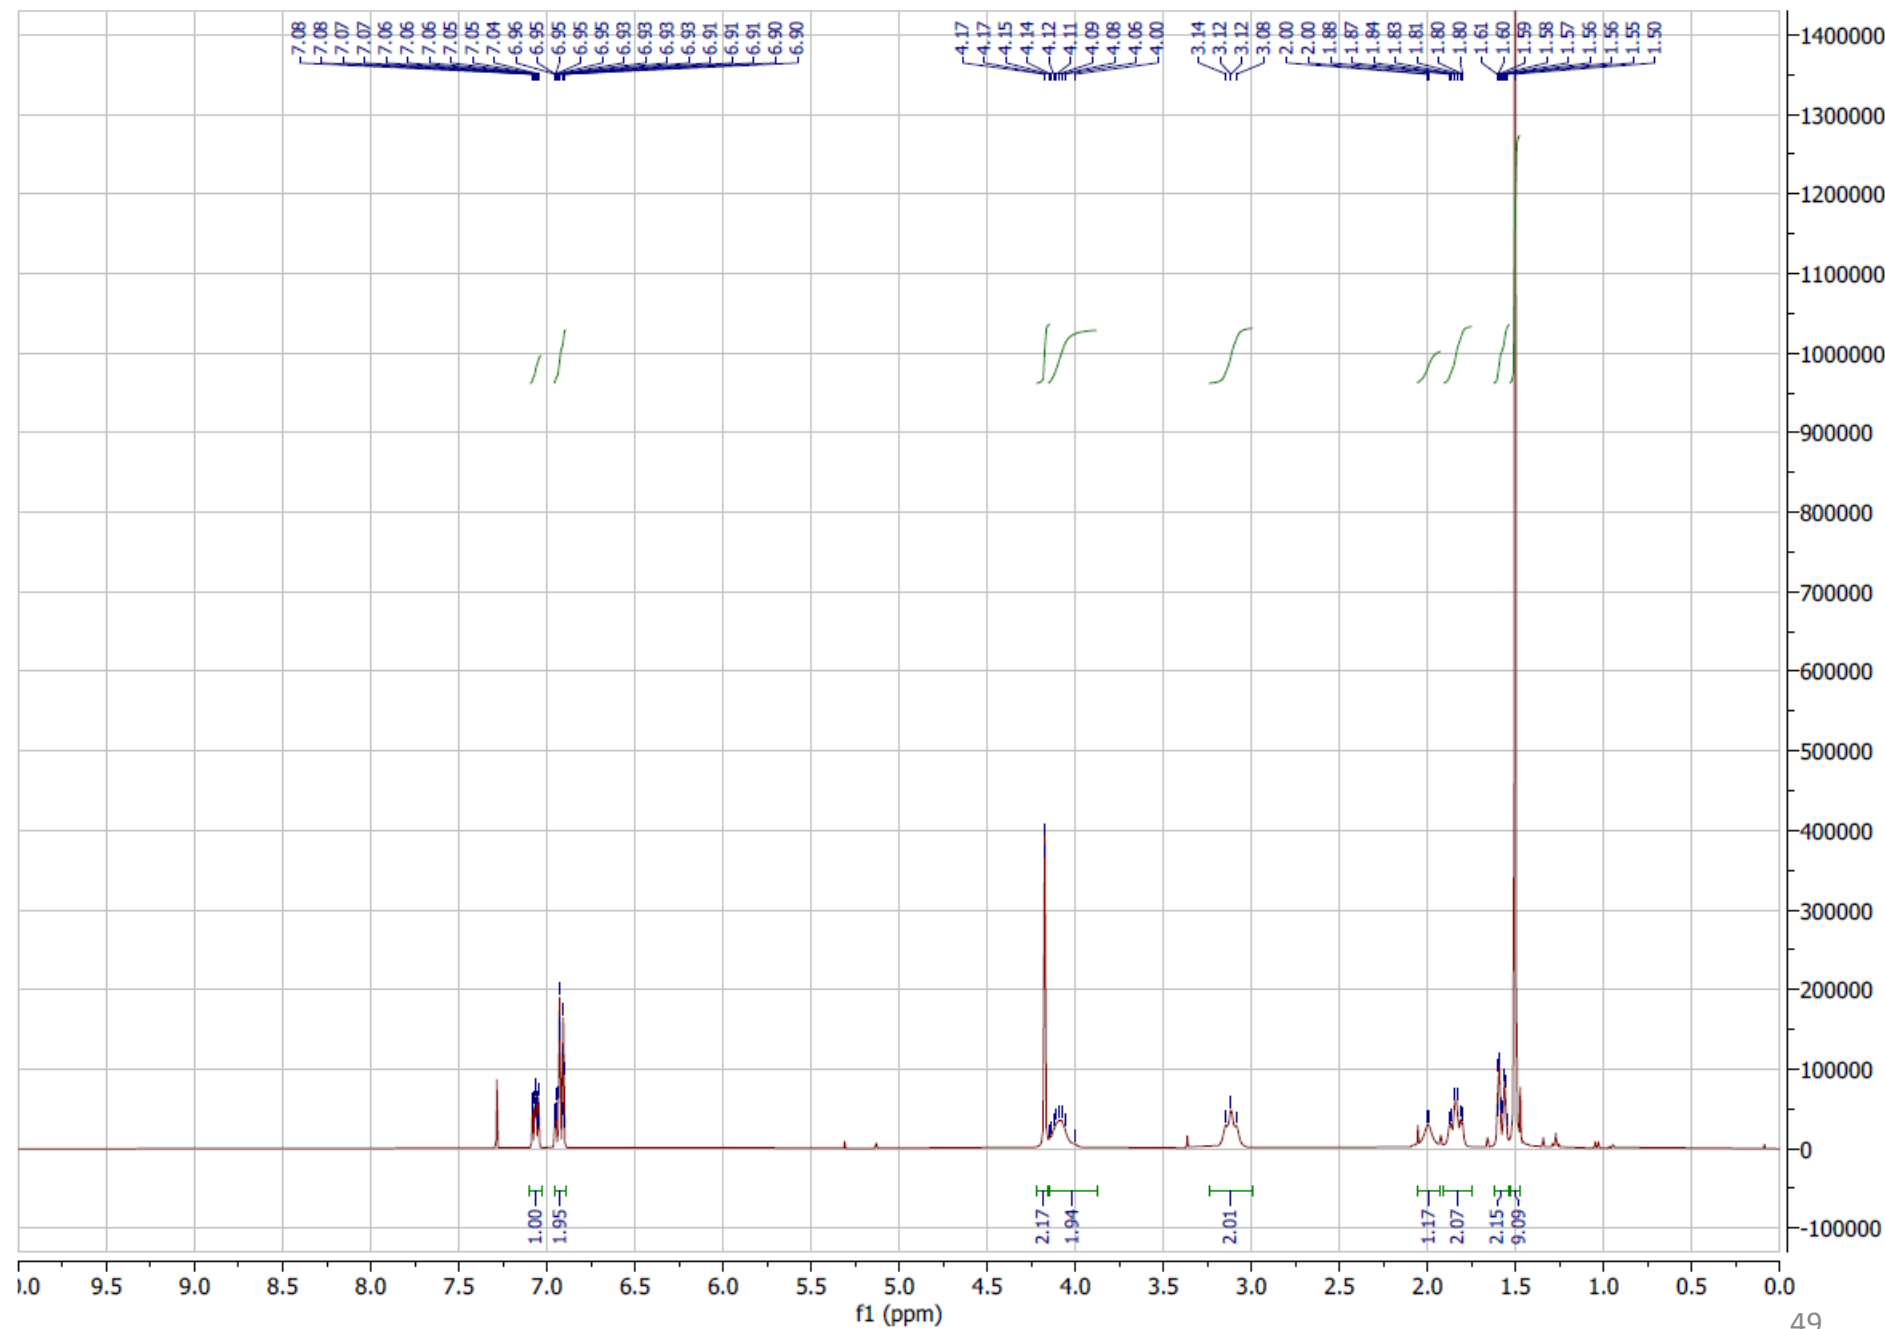

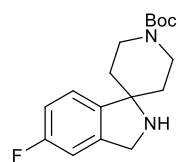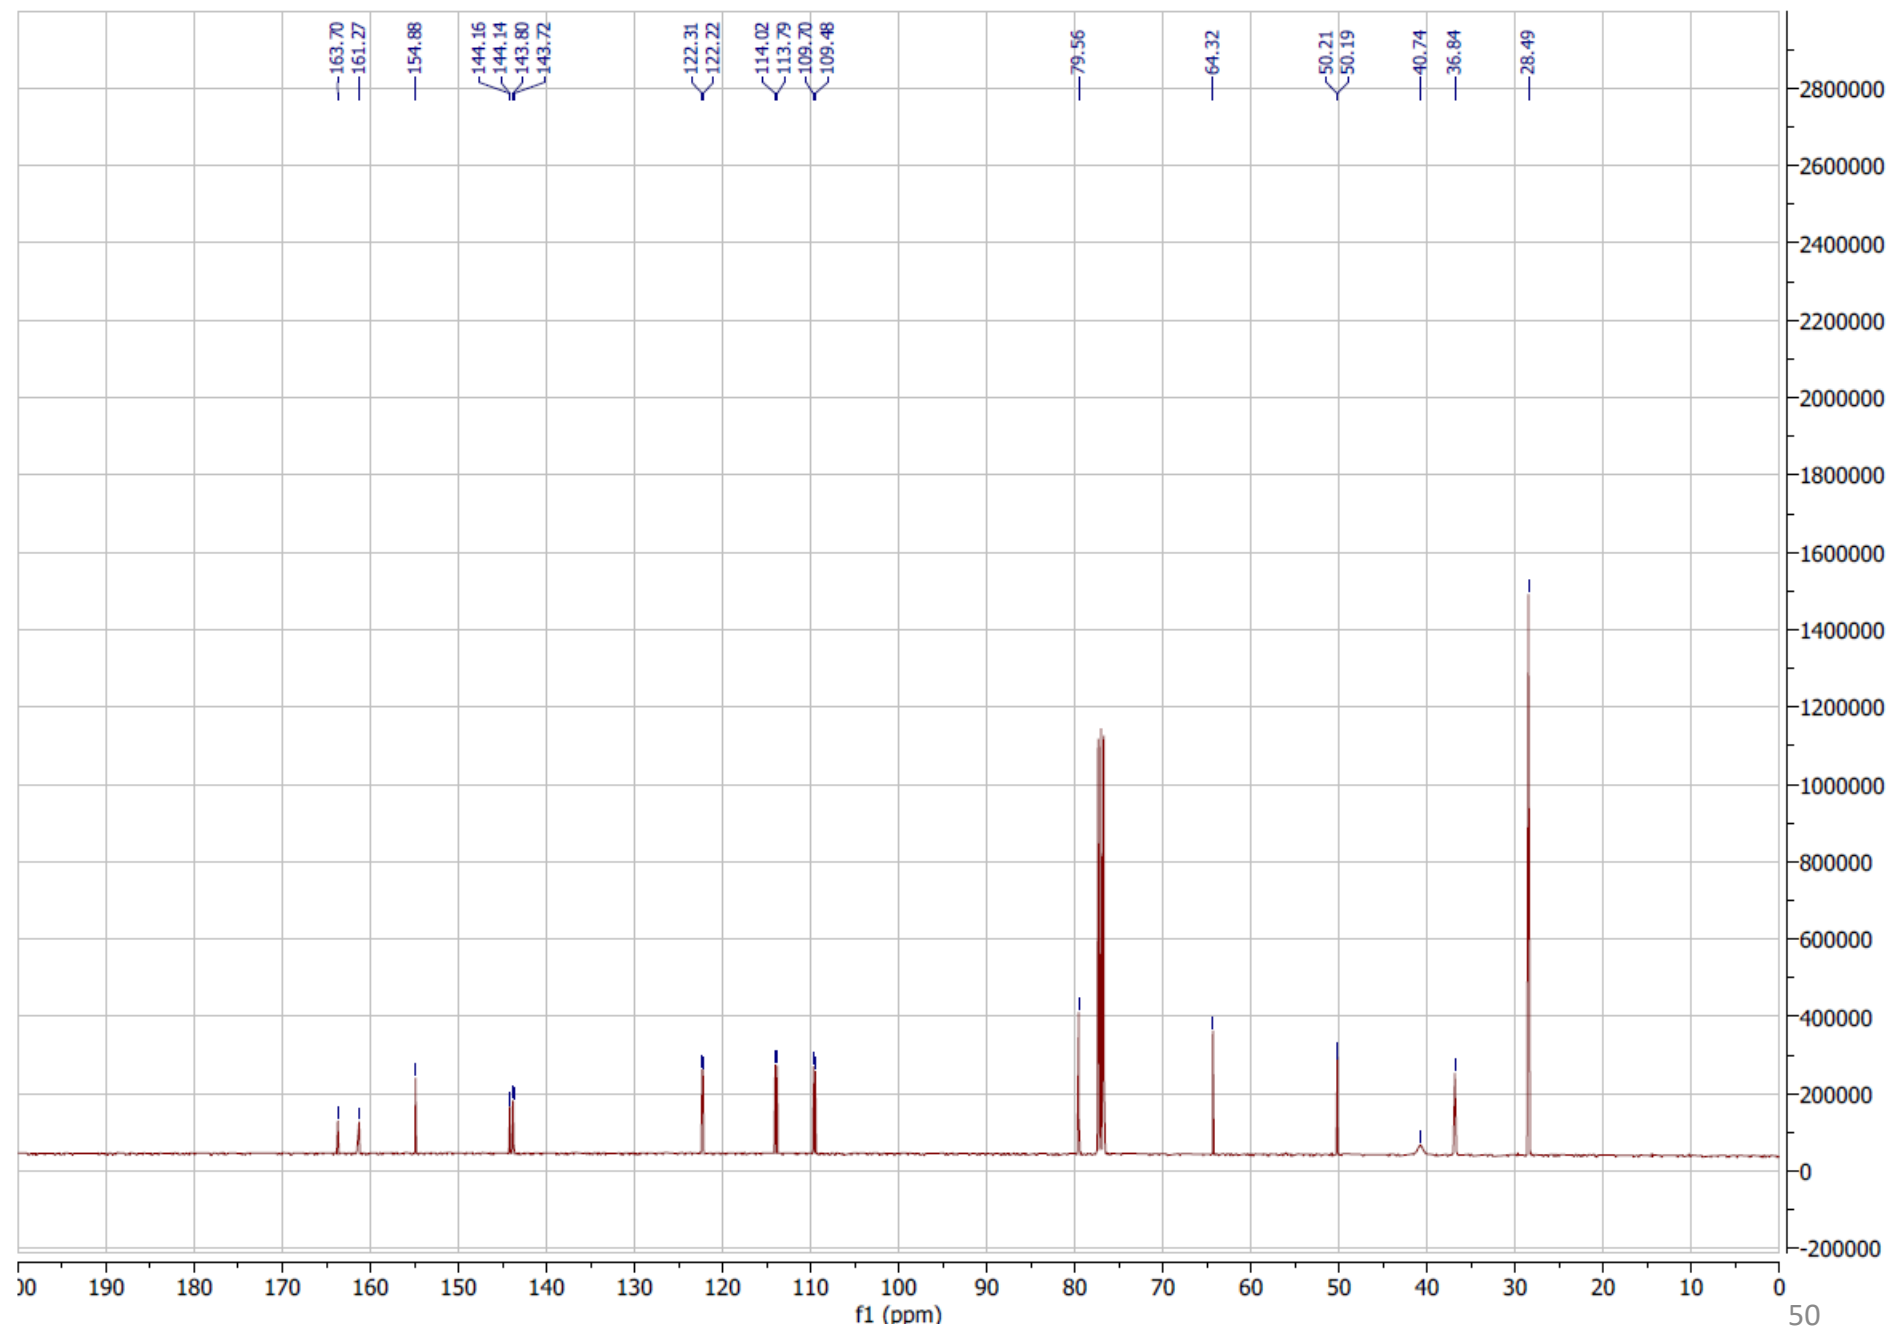

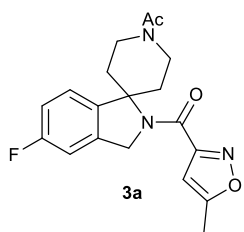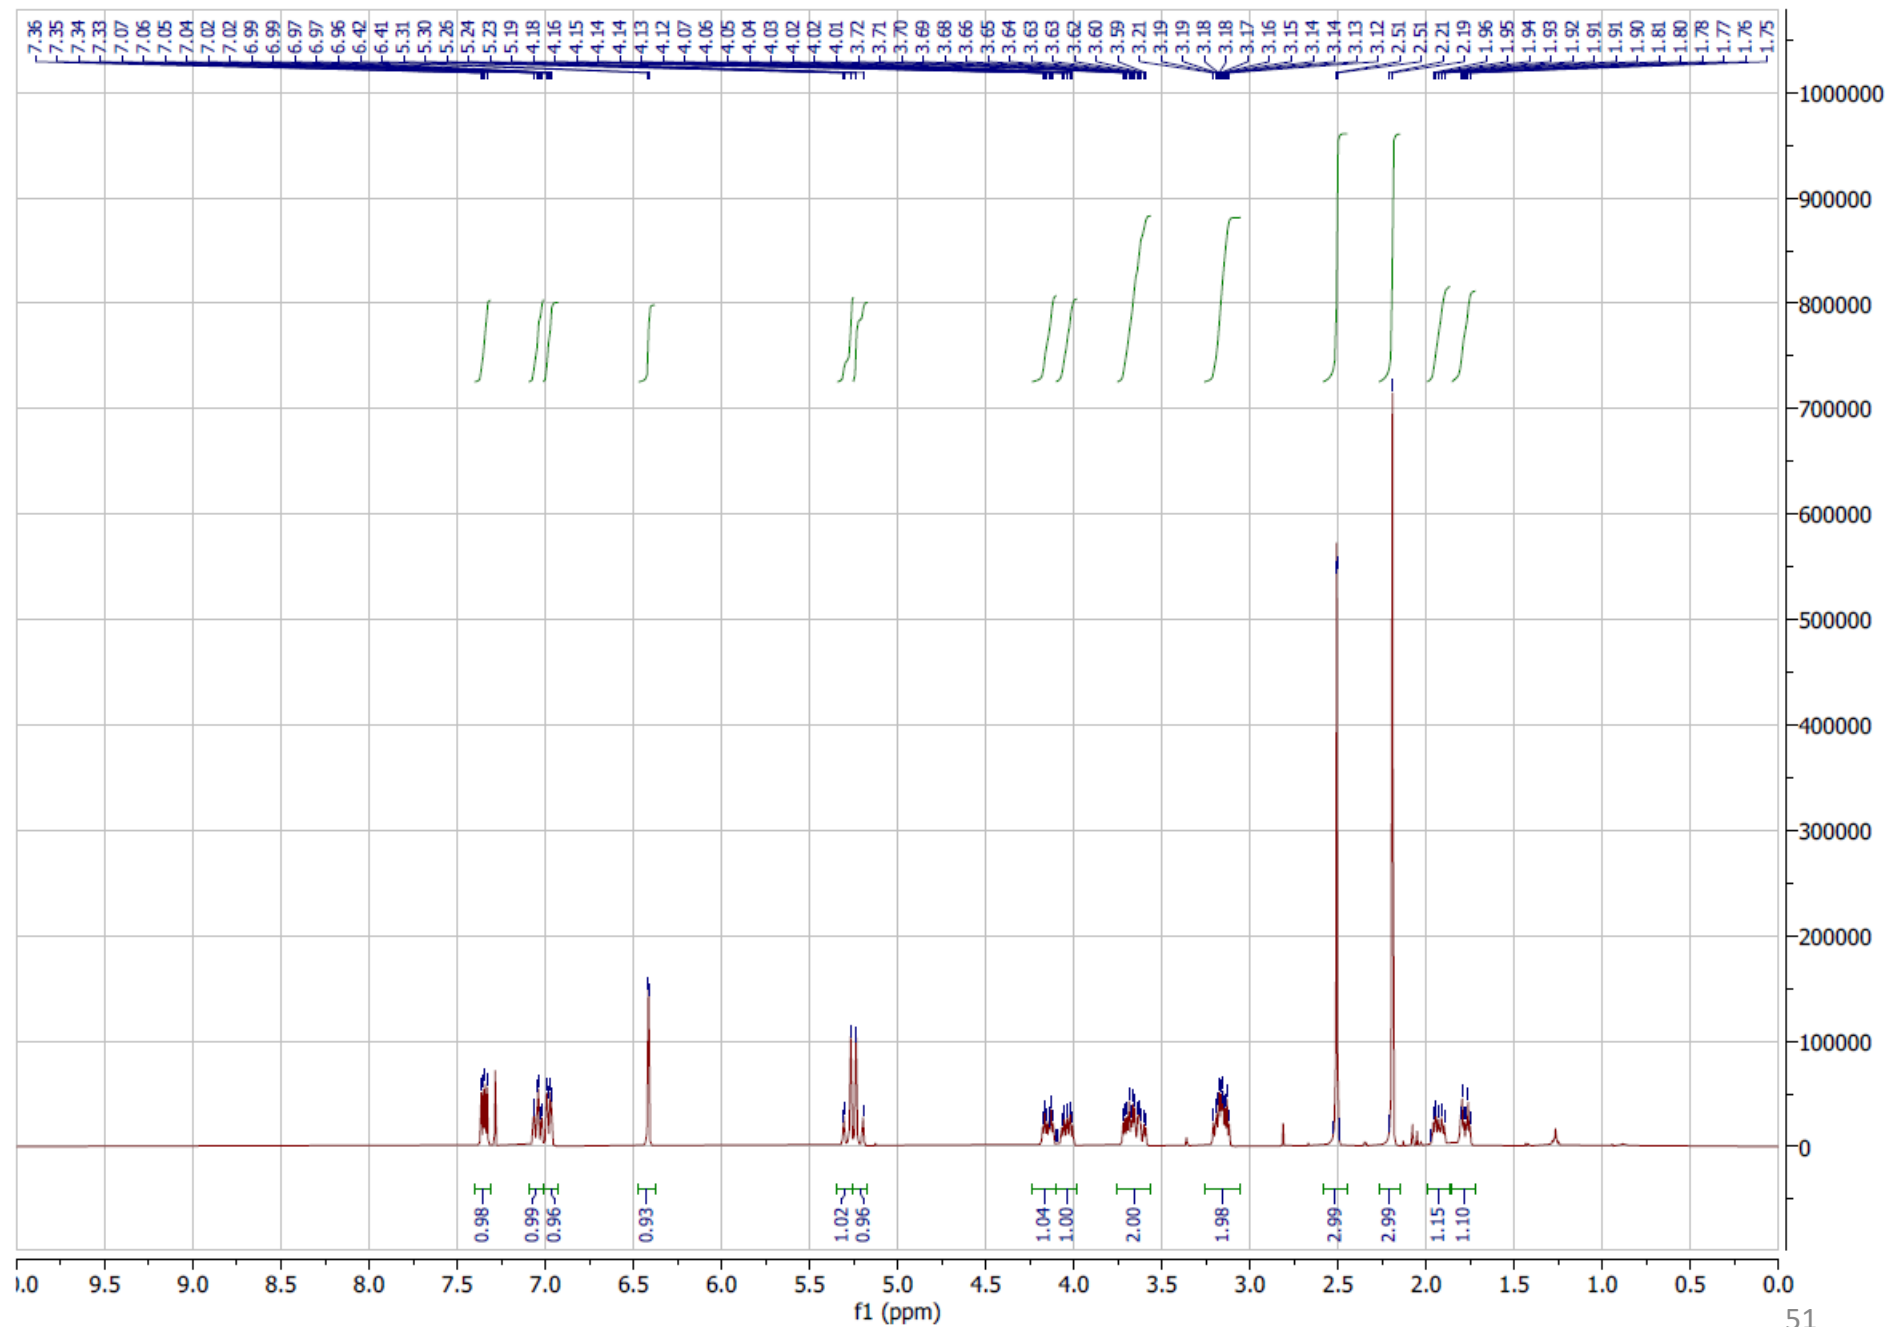

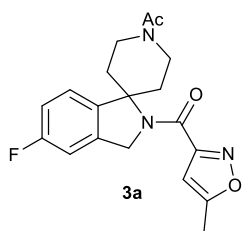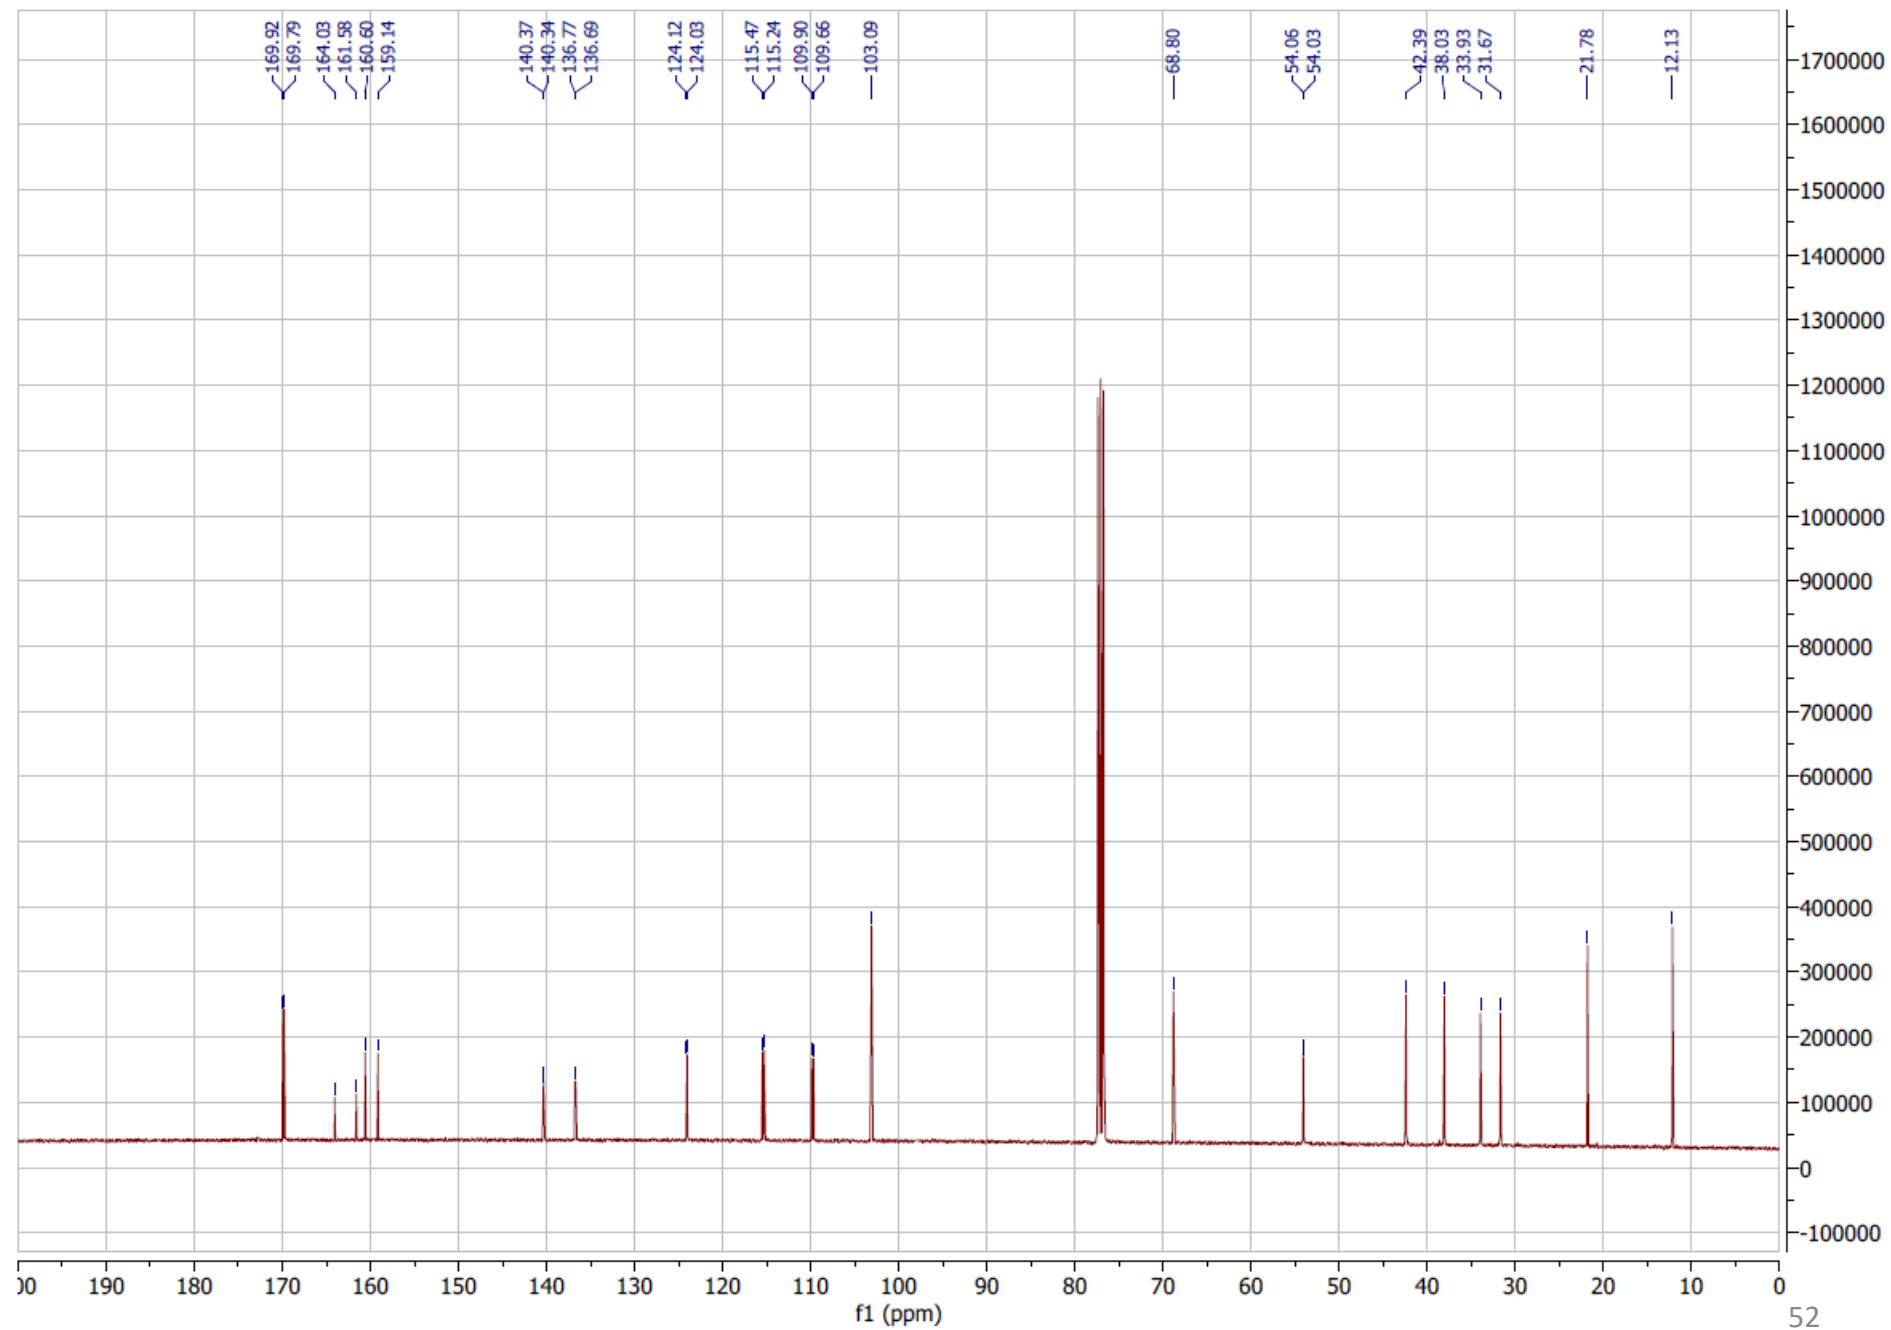

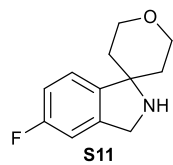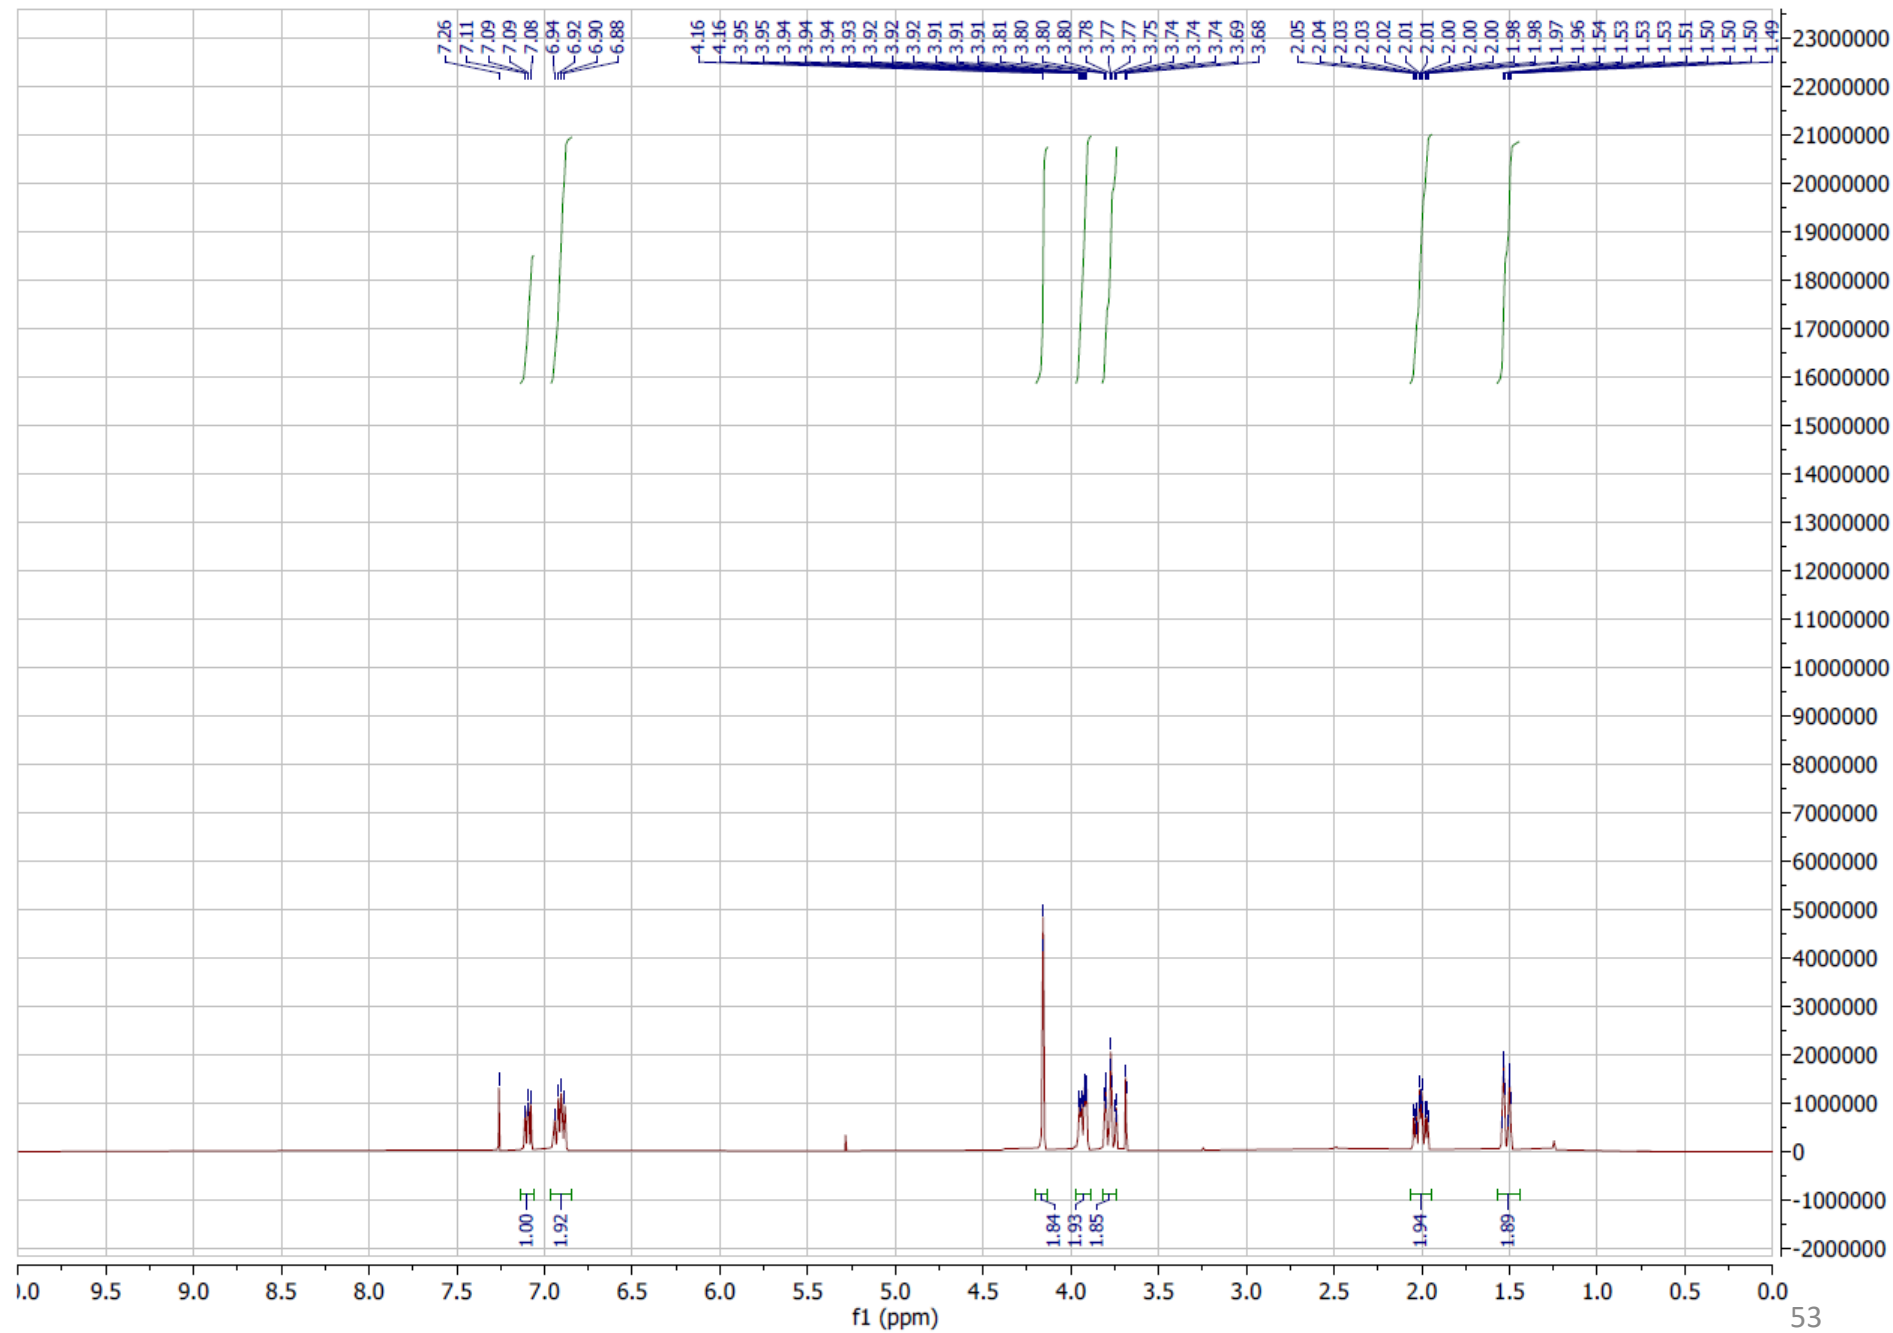

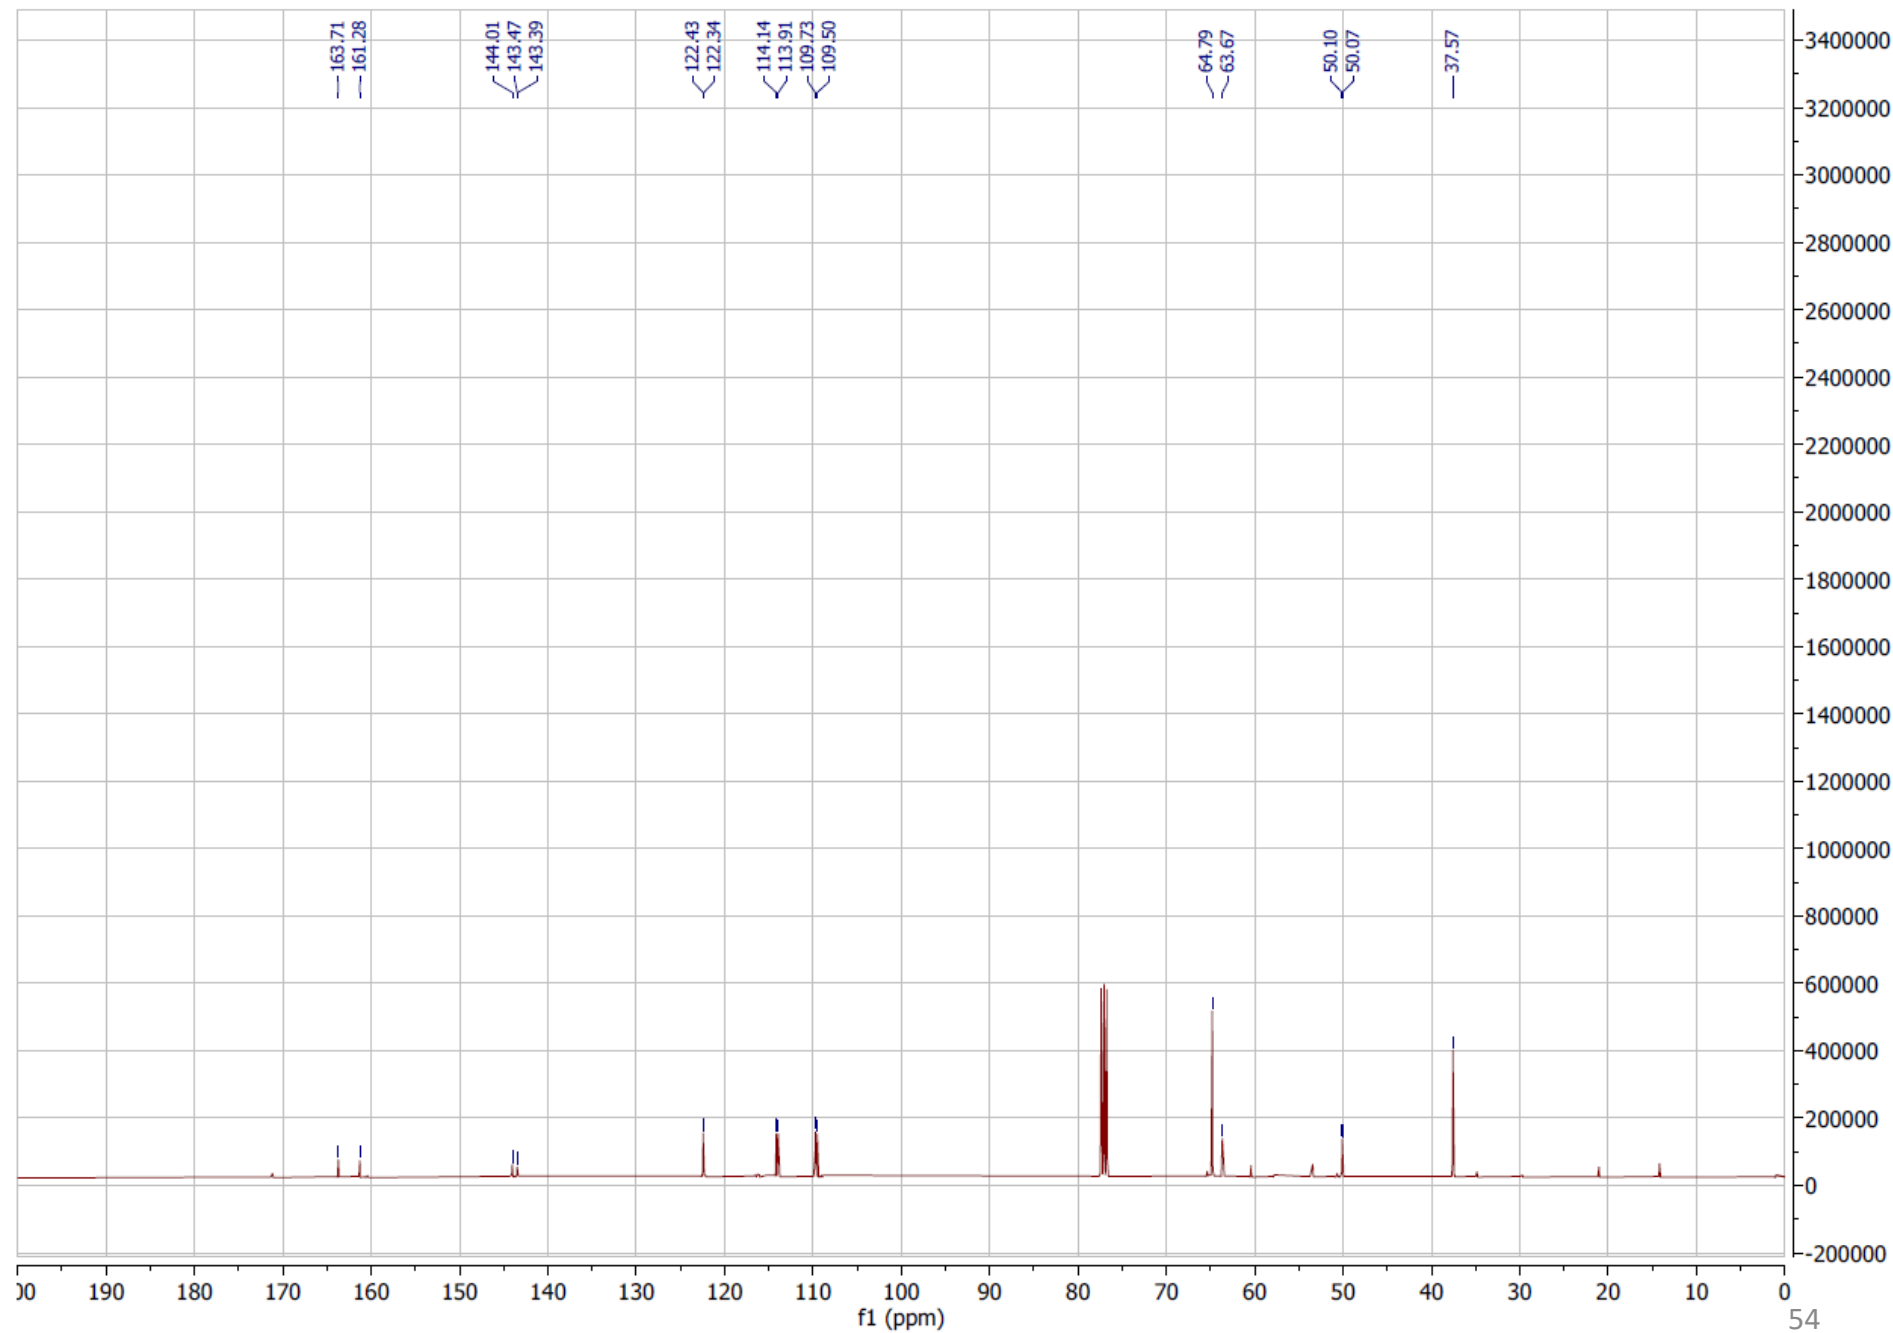



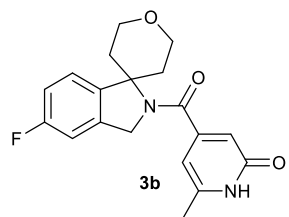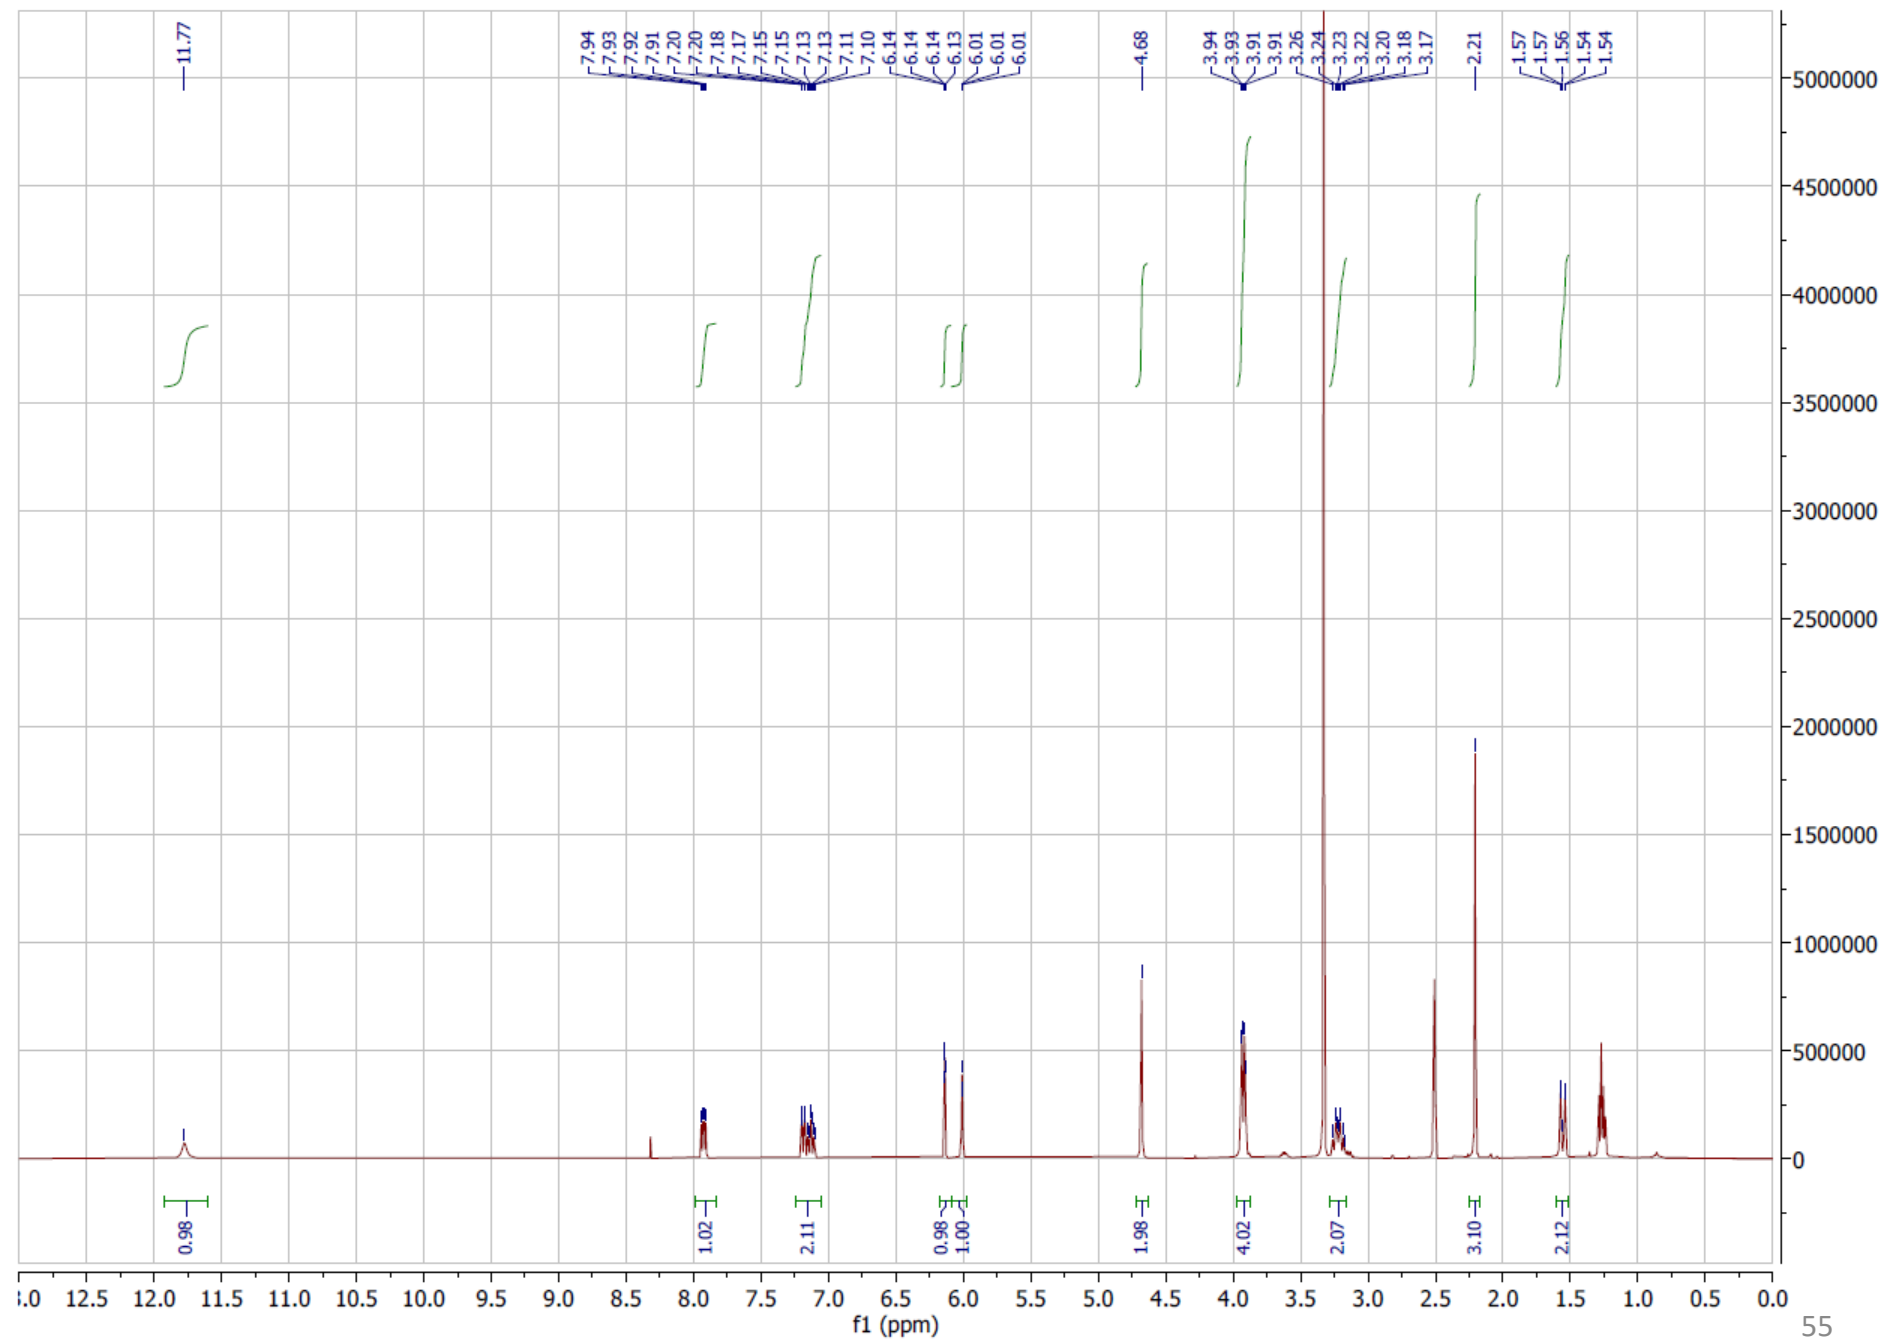

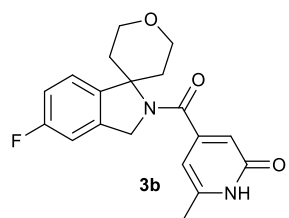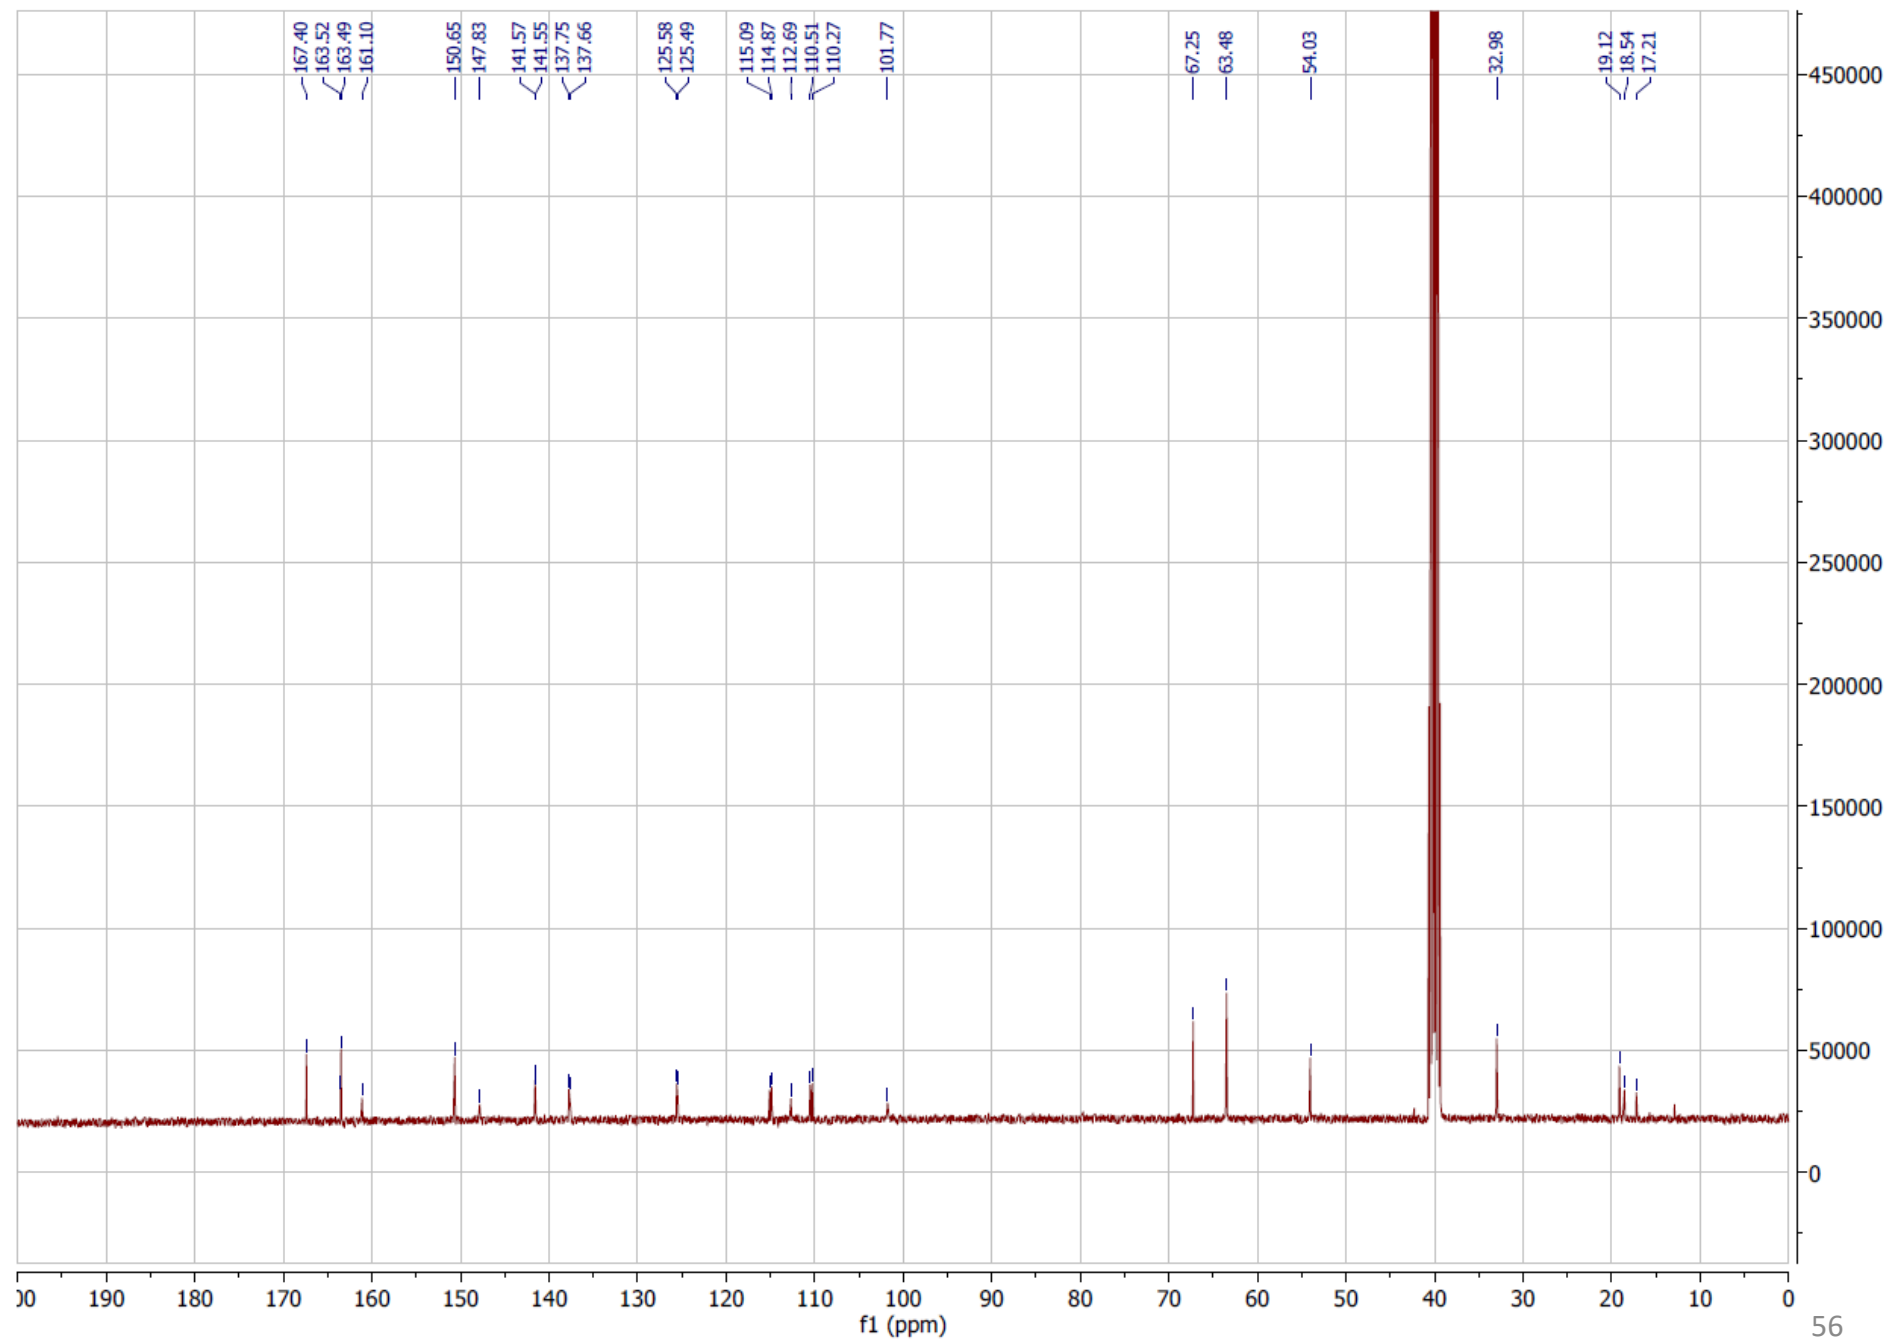

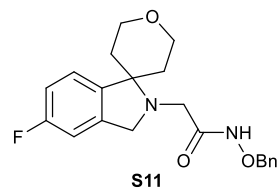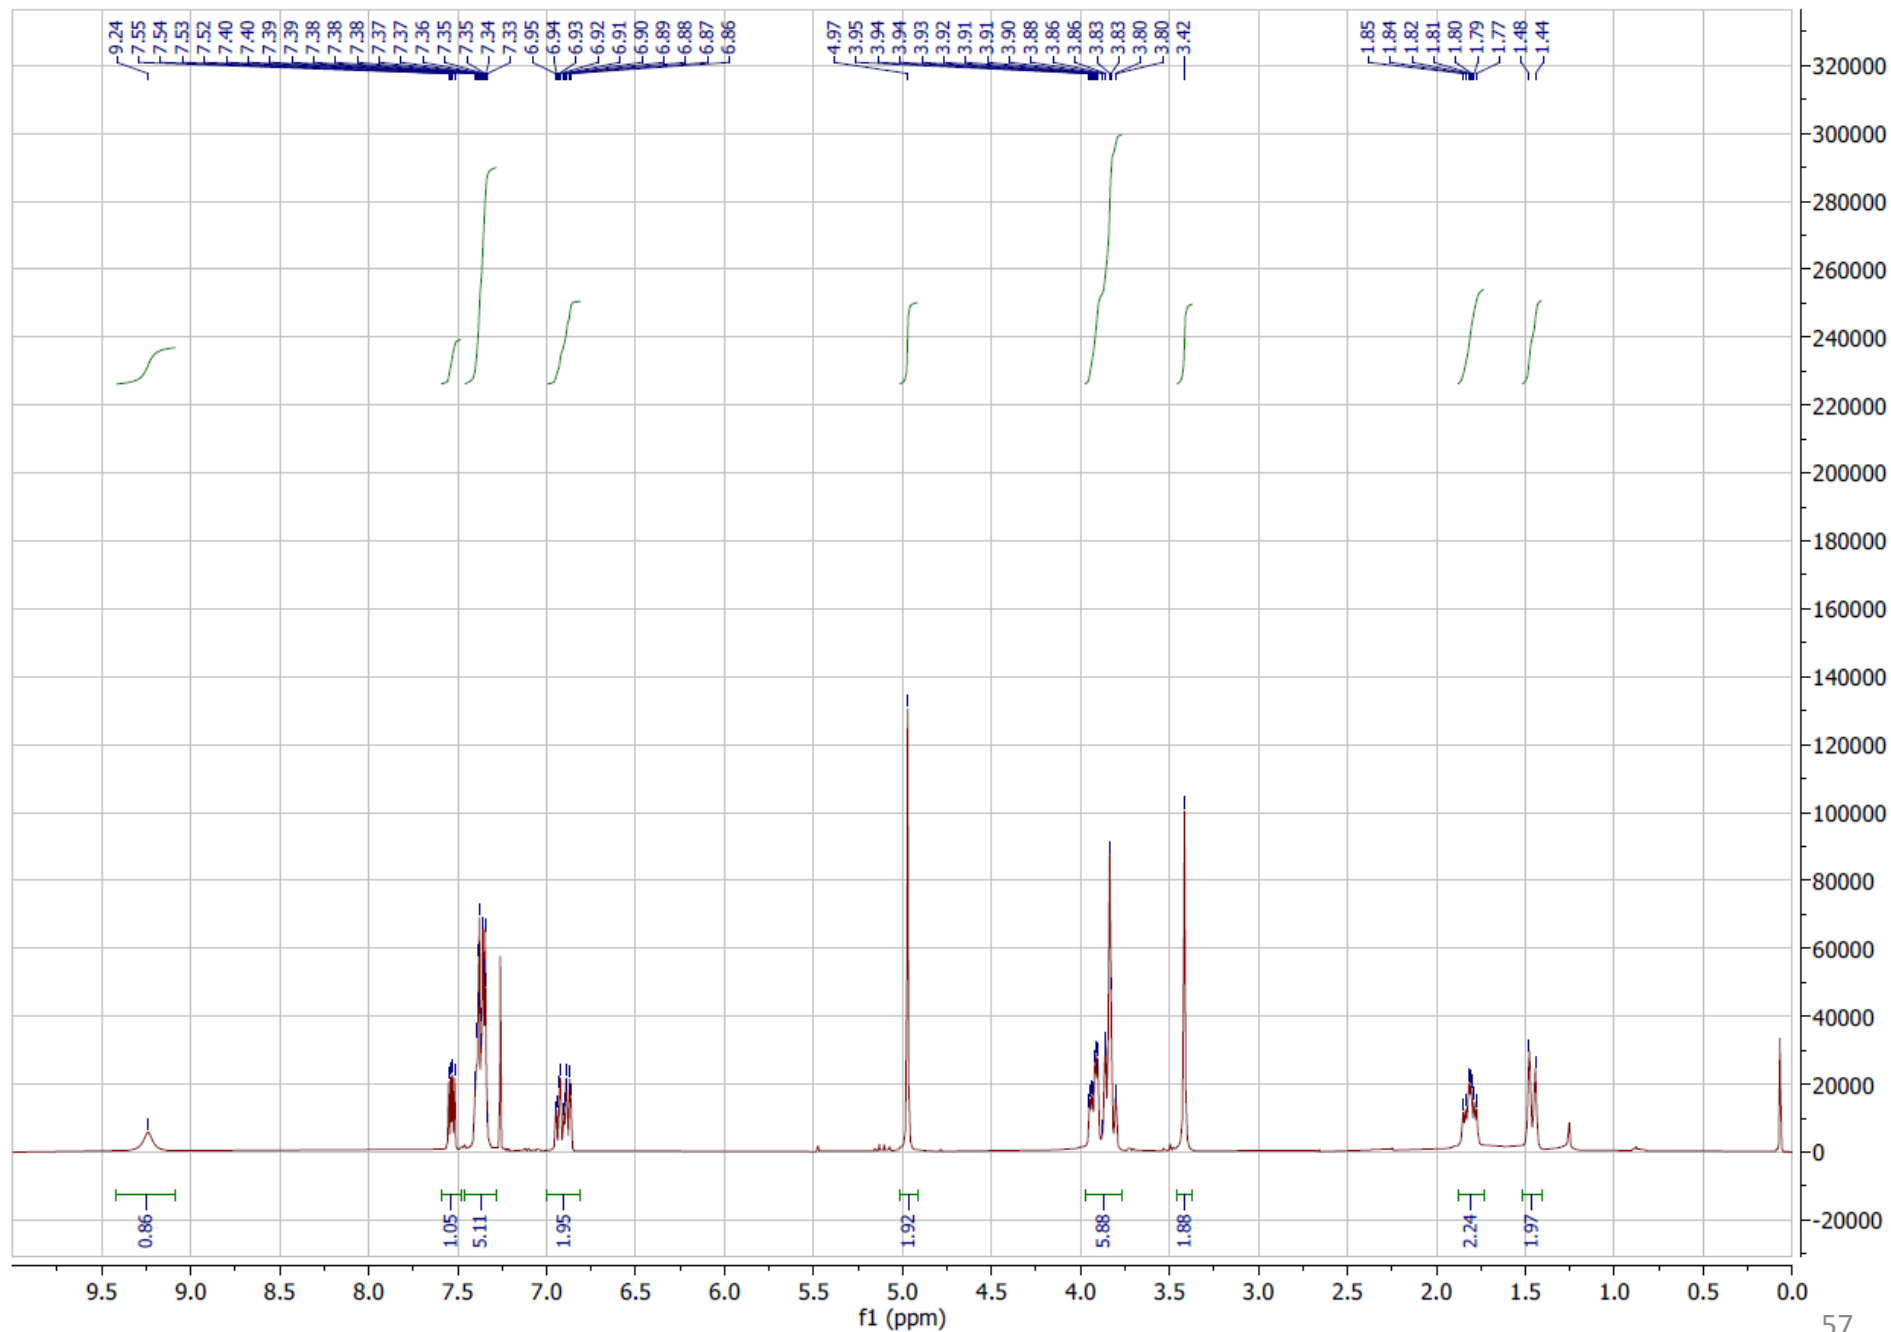

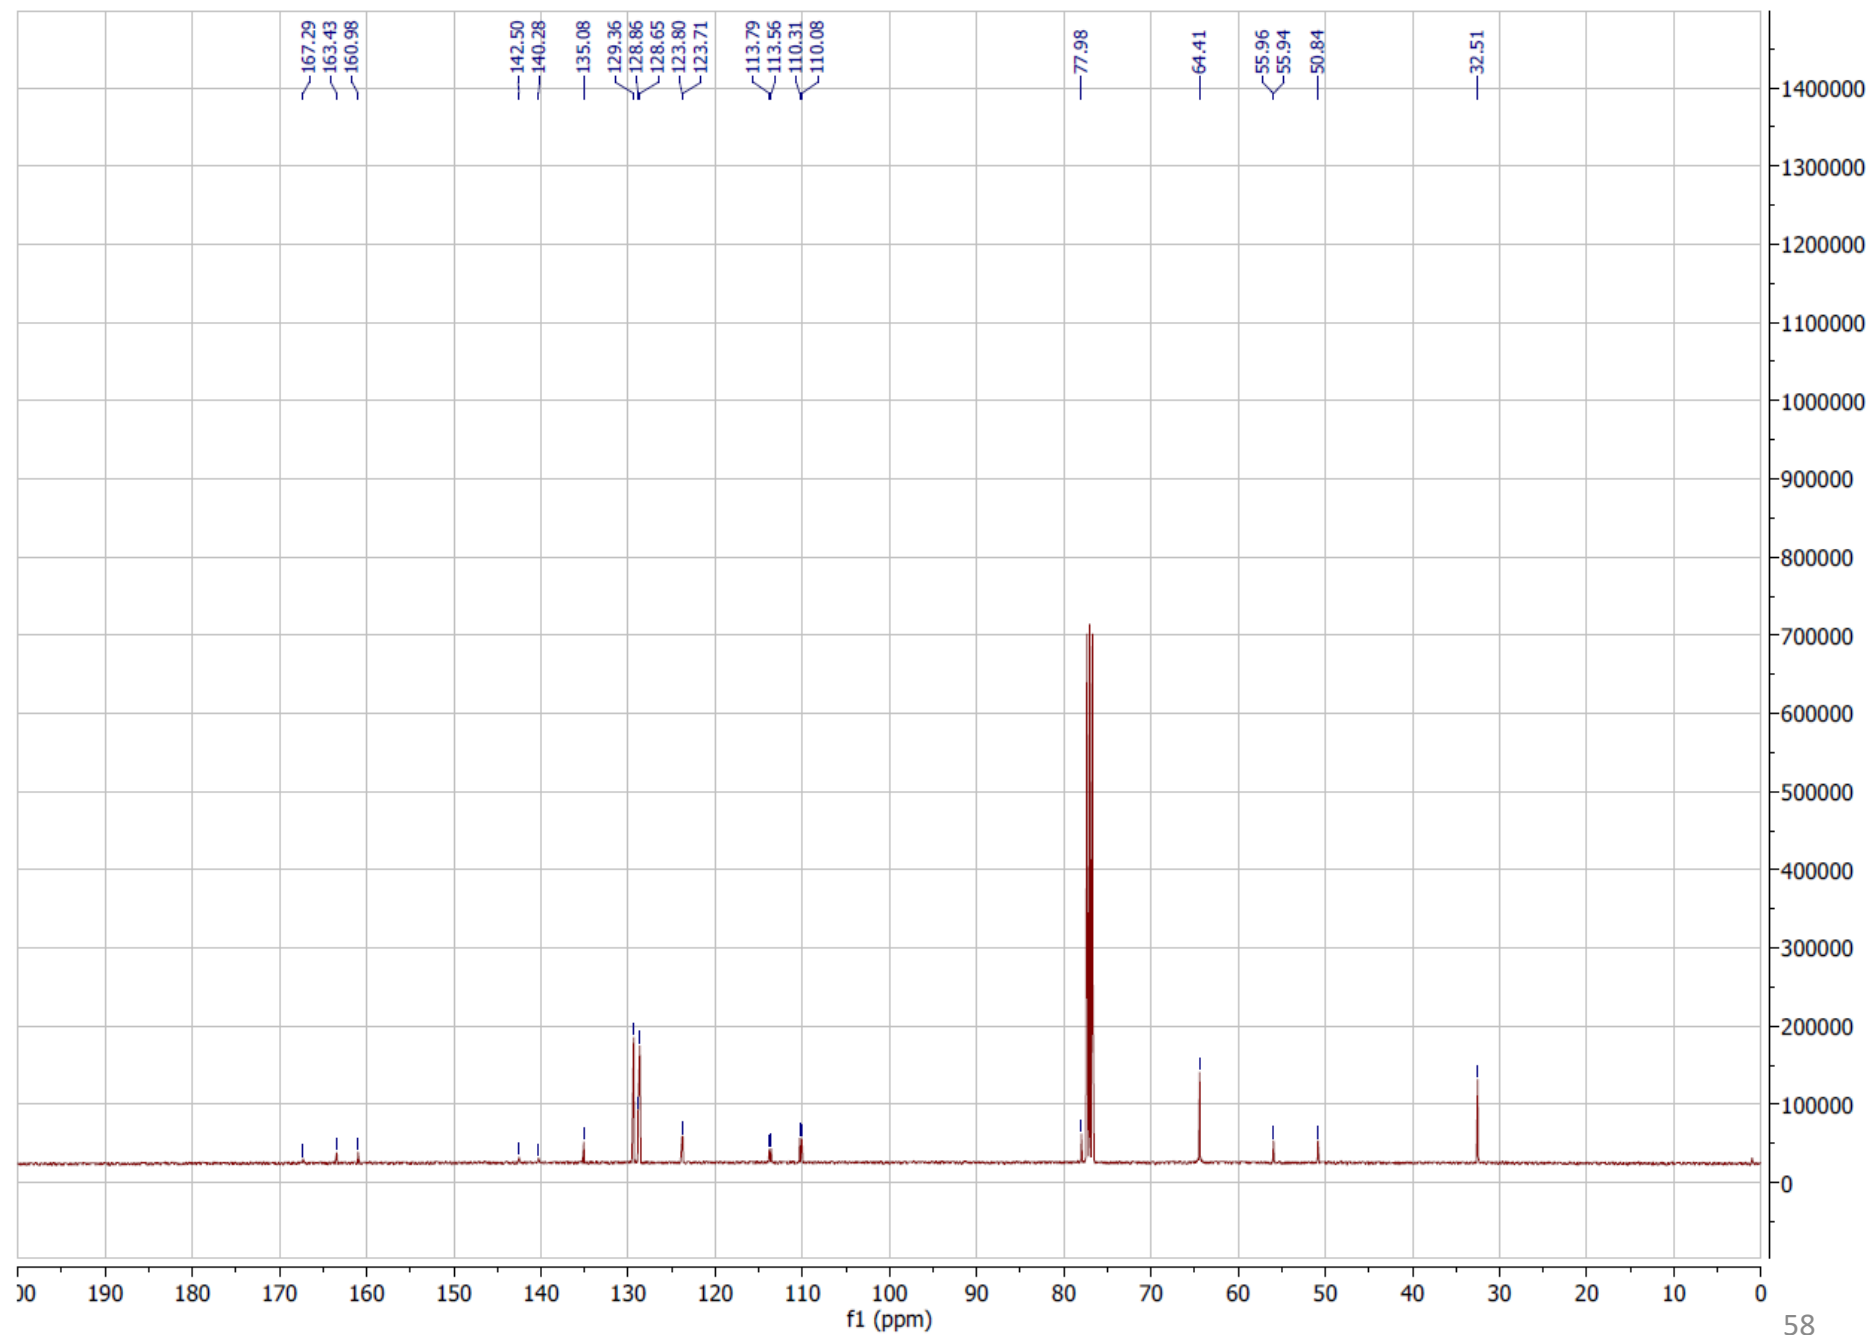

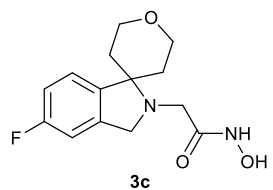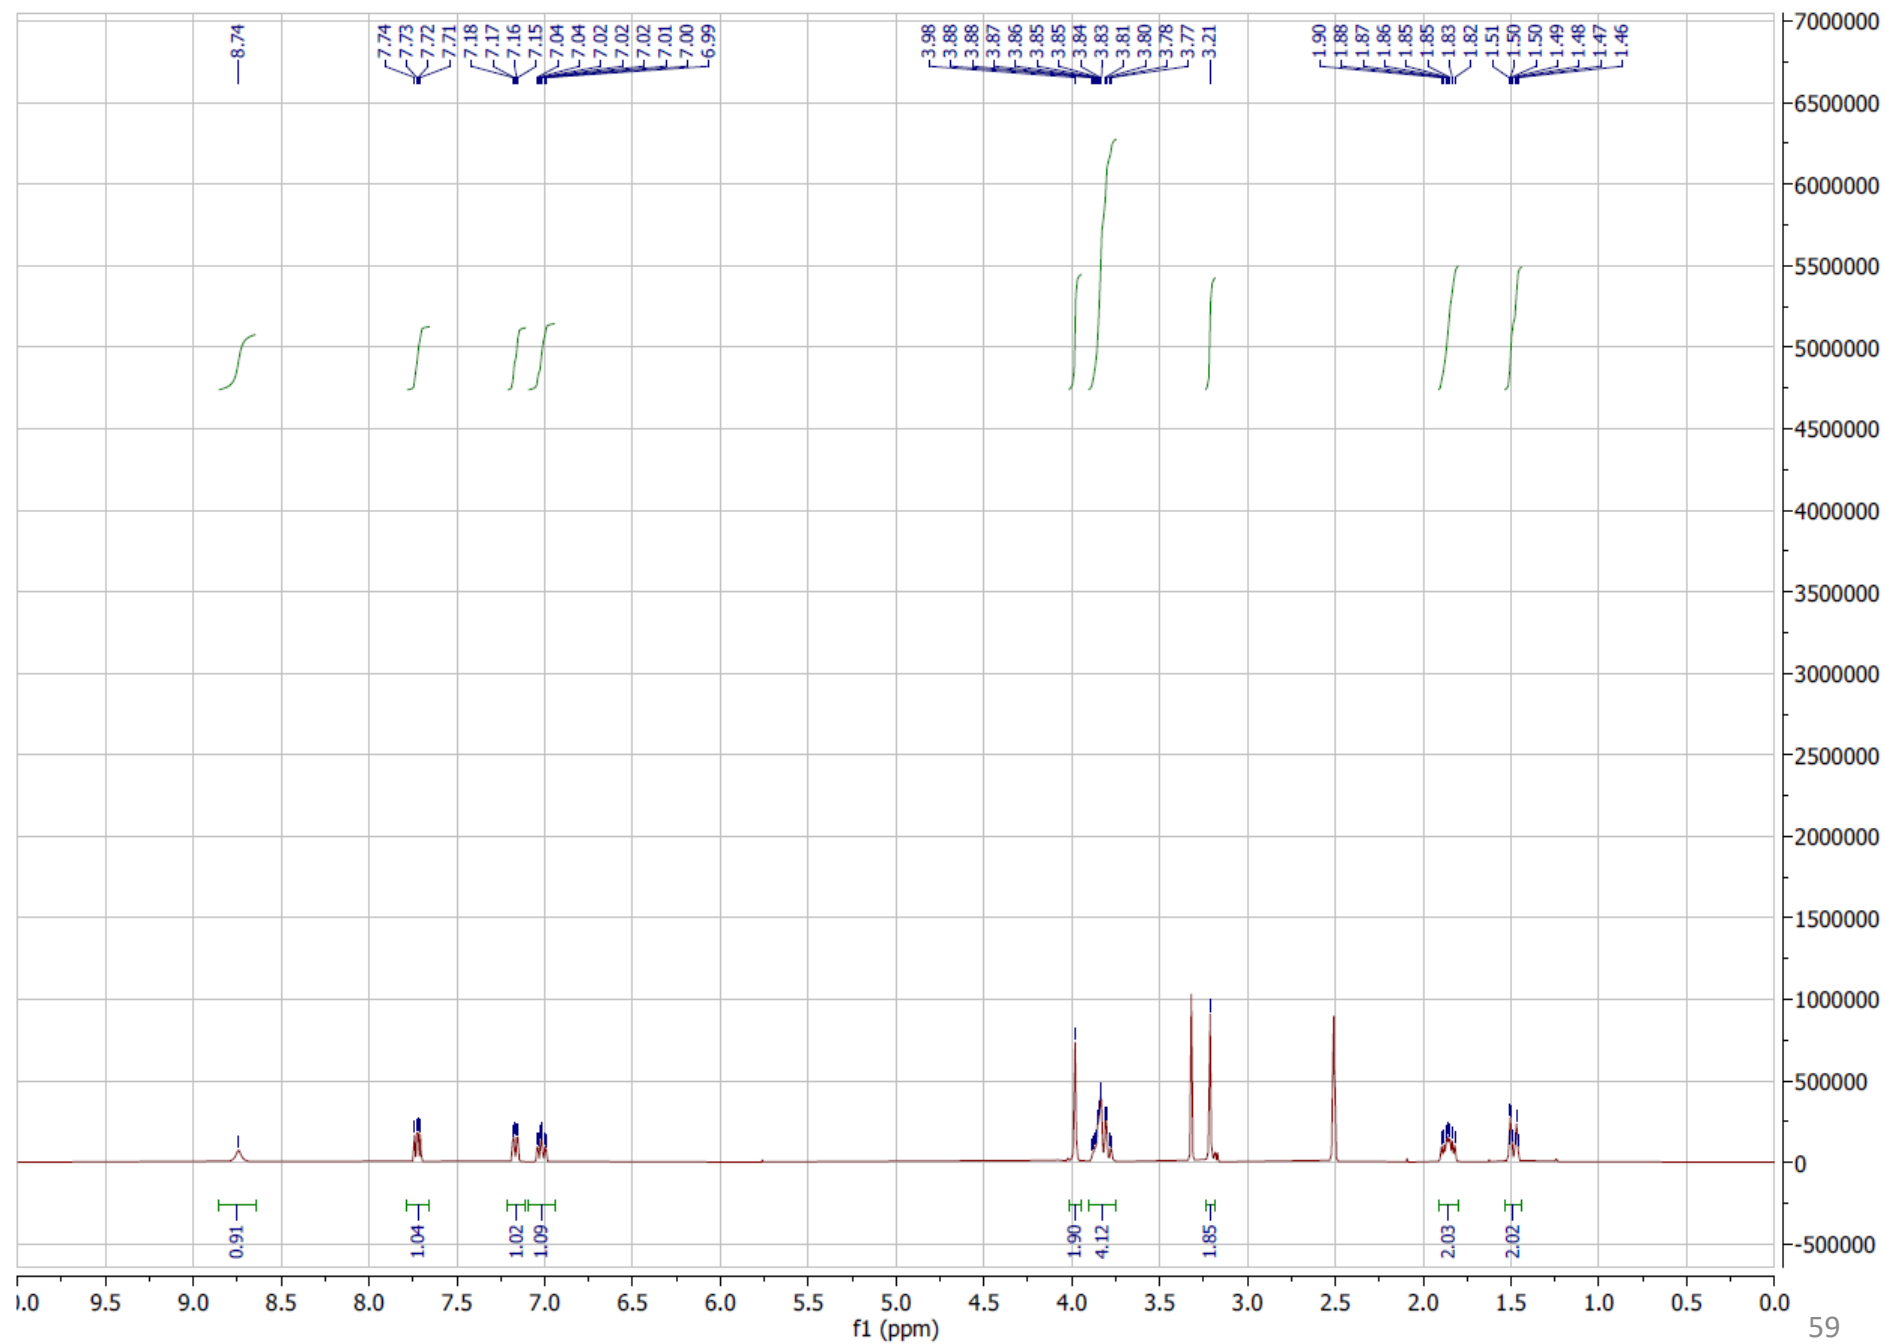

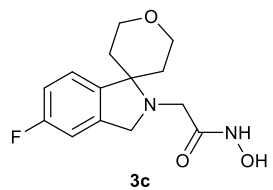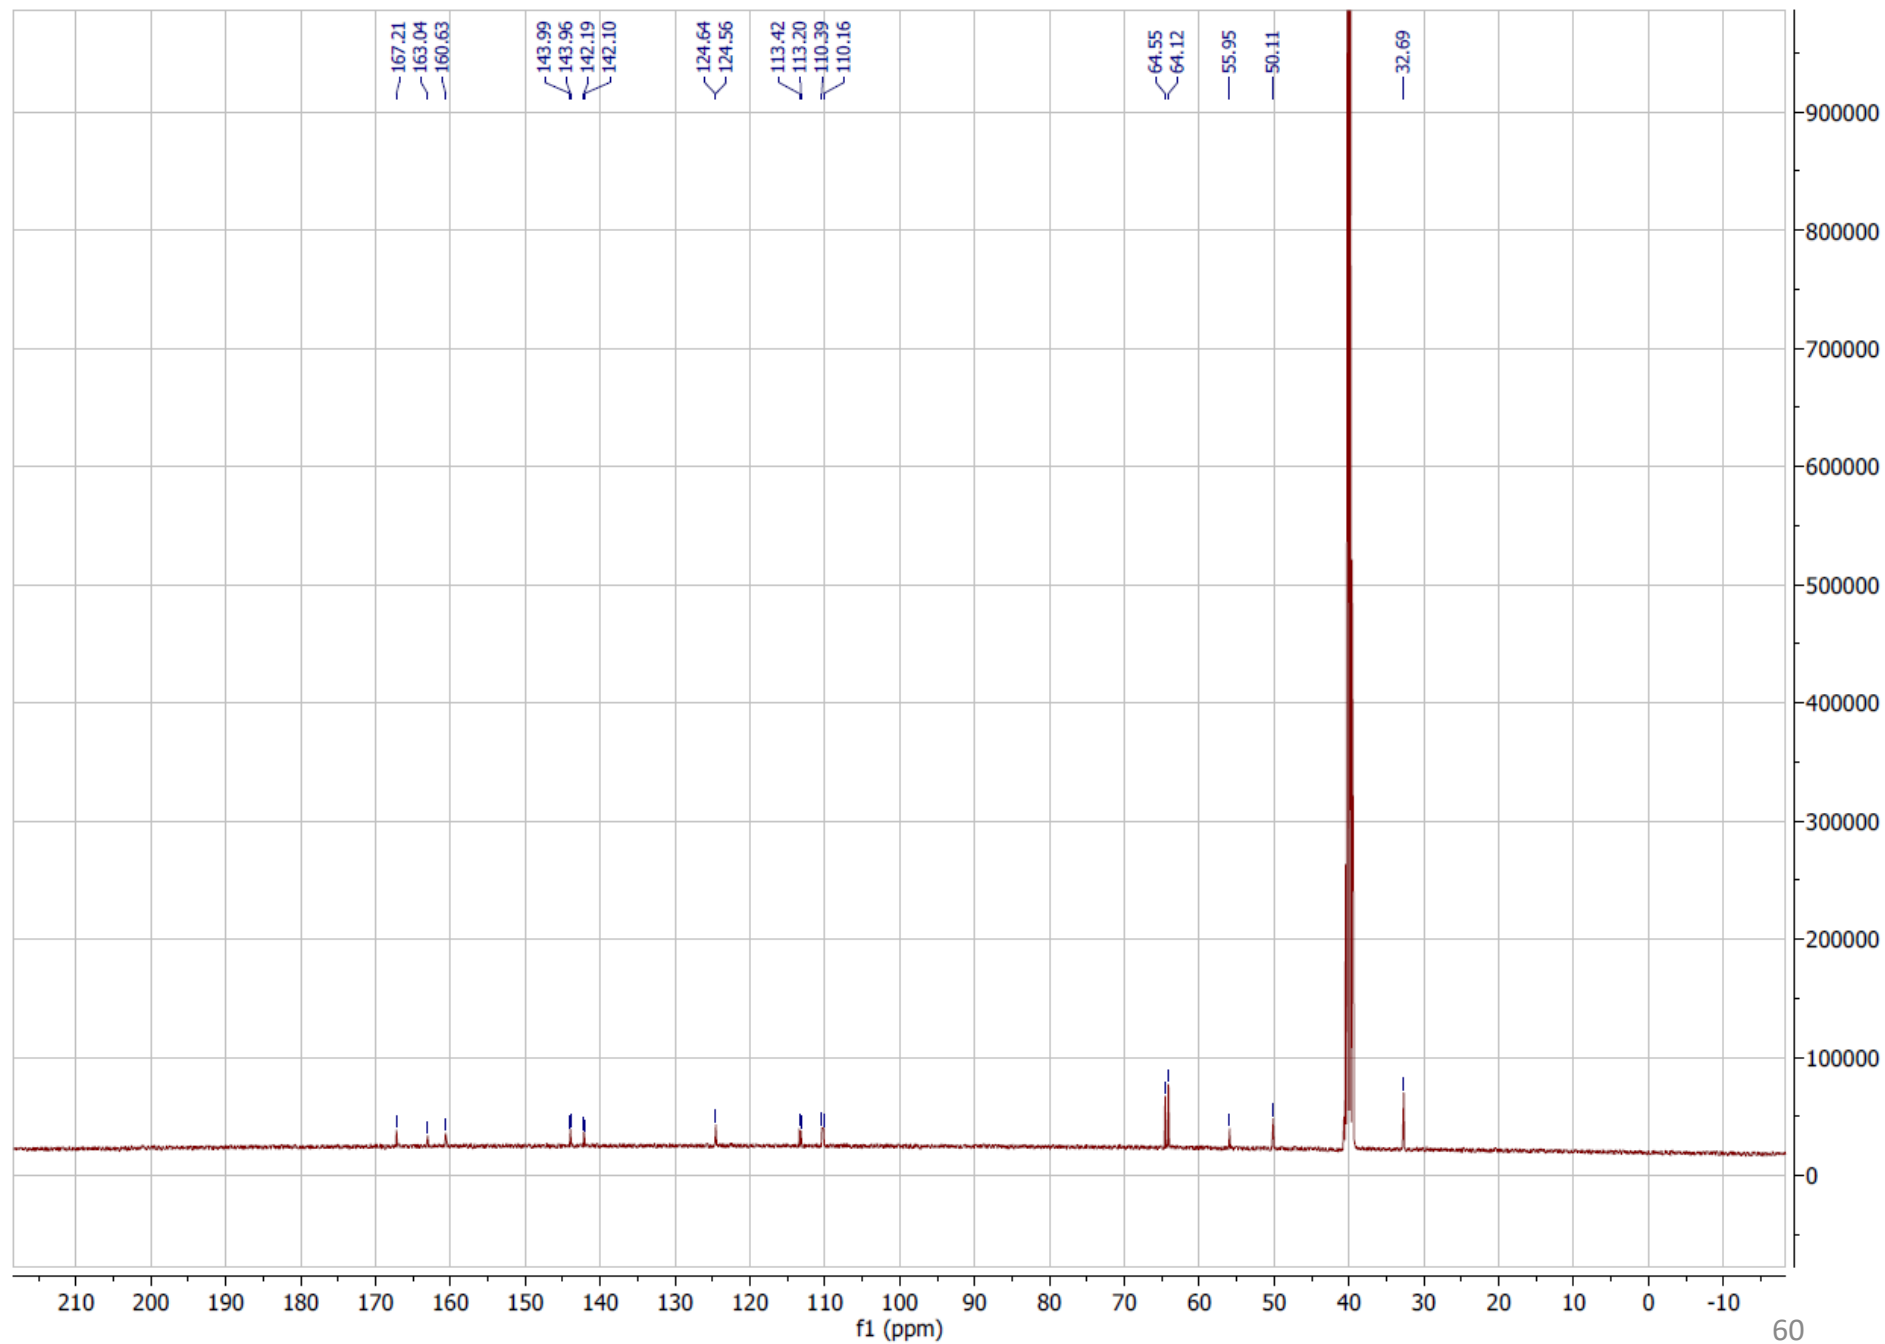

Supplement: d3cc04317g1.pdf [file d3cc04317g1.pdf]
